# Supplementary material for: Integrative Analyses of Widely Targeted Metabolic Profiling and Transcriptome Data Reveals Molecular Insight into Metabolomic Variations during Apple (Malus domestica) Fruit Development and Ripening
Source: PubMed Central journal article supplement (PMC7370097; doi:10.3390/ijms21134797), 2020-07-07
Supplement: ijms-21-04797-s001.pdf [file ijms-21-04797-s001.pdf]

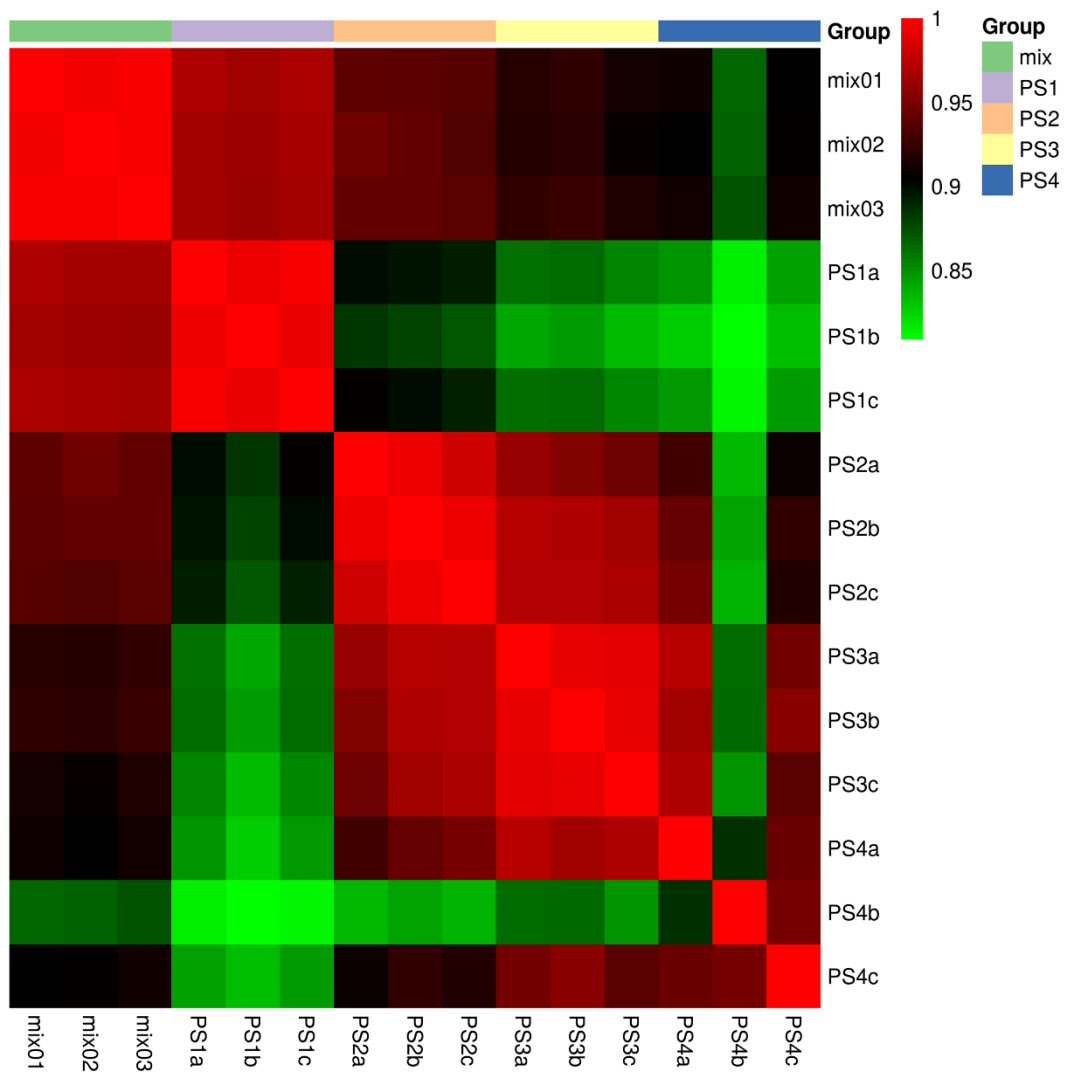

**Figure S1.** Heat map of  $r$  (Pearson's correlation coefficient) value among different samples including replicates. The color represented the  $r$  value.

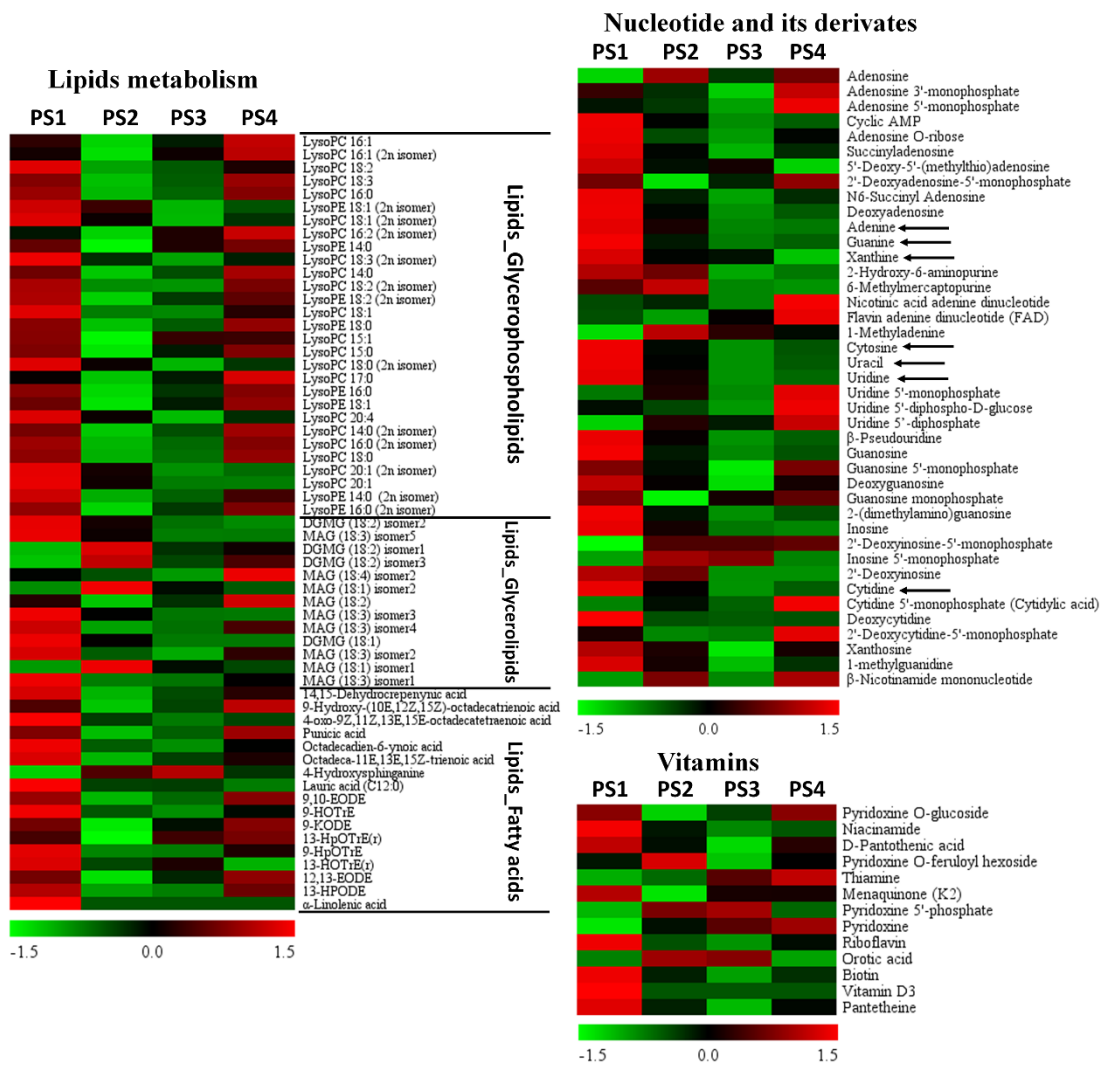

**Figure S2.** Distributions of accumulation profiles of lipids, nucleotides, and vitamins detected by widely-targeted UPLC-MC during four fruit developmental stages. The colors indicate the proportional content of each identified metabolites as determined by the average peak response area with R scale normalization. PS1, 2, 3, and 4 represents fruit samples collected at 27, 84, 125, 165 Days After Anthesis (DAA), respectively. Three independent replicates were performed for each stages.

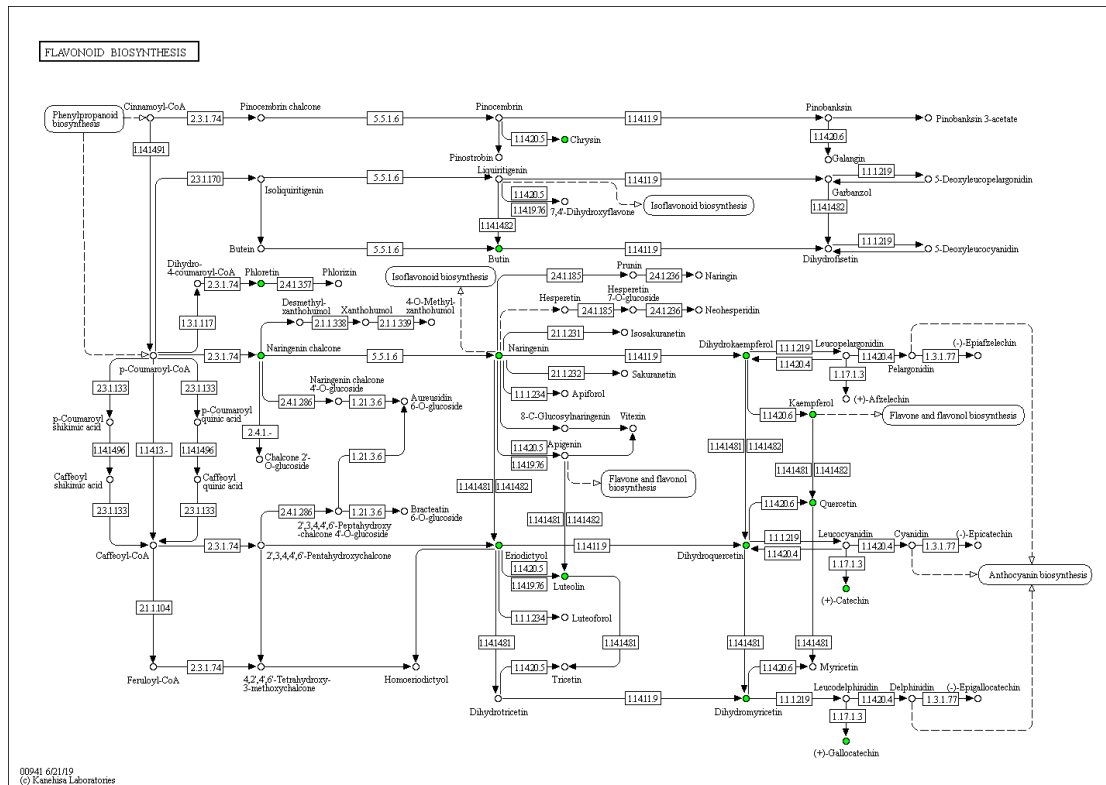

Figure S3. Differential metabolites of PS2 vs PS1 group in flavonoid biosynthesis pathway.

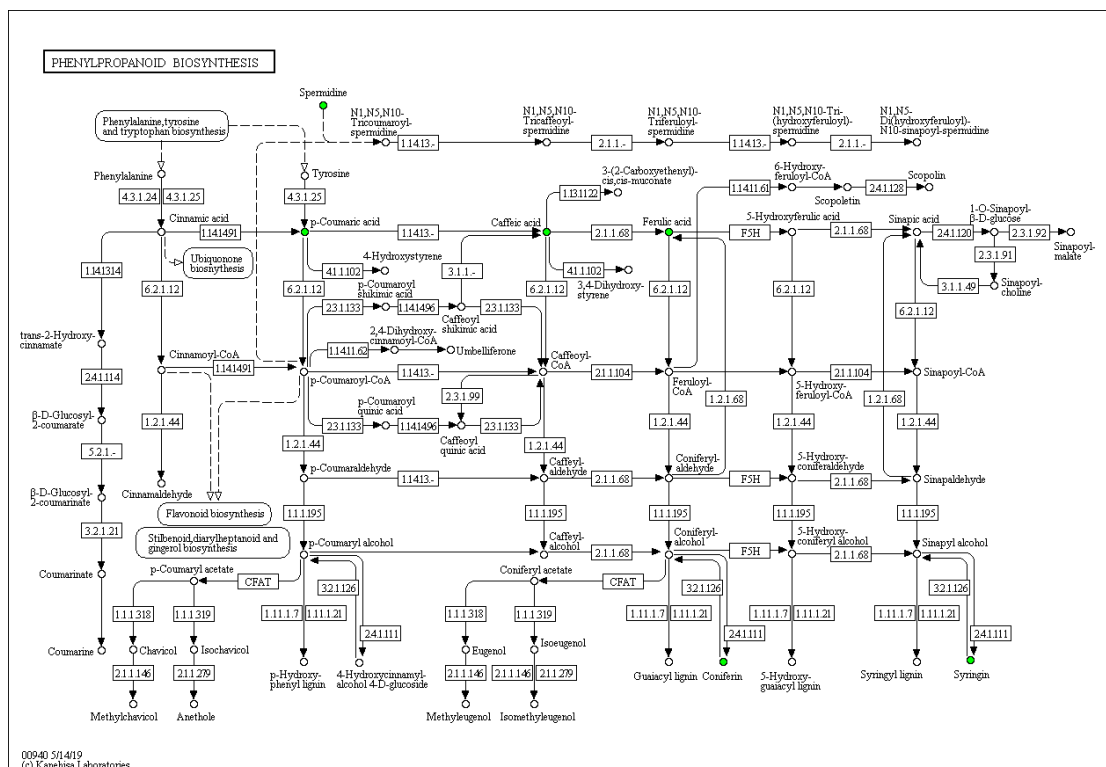

Figure S4. Differential metabolites of PS2 vs PS1 group in phenylpropanoid biosynthesis pathway.

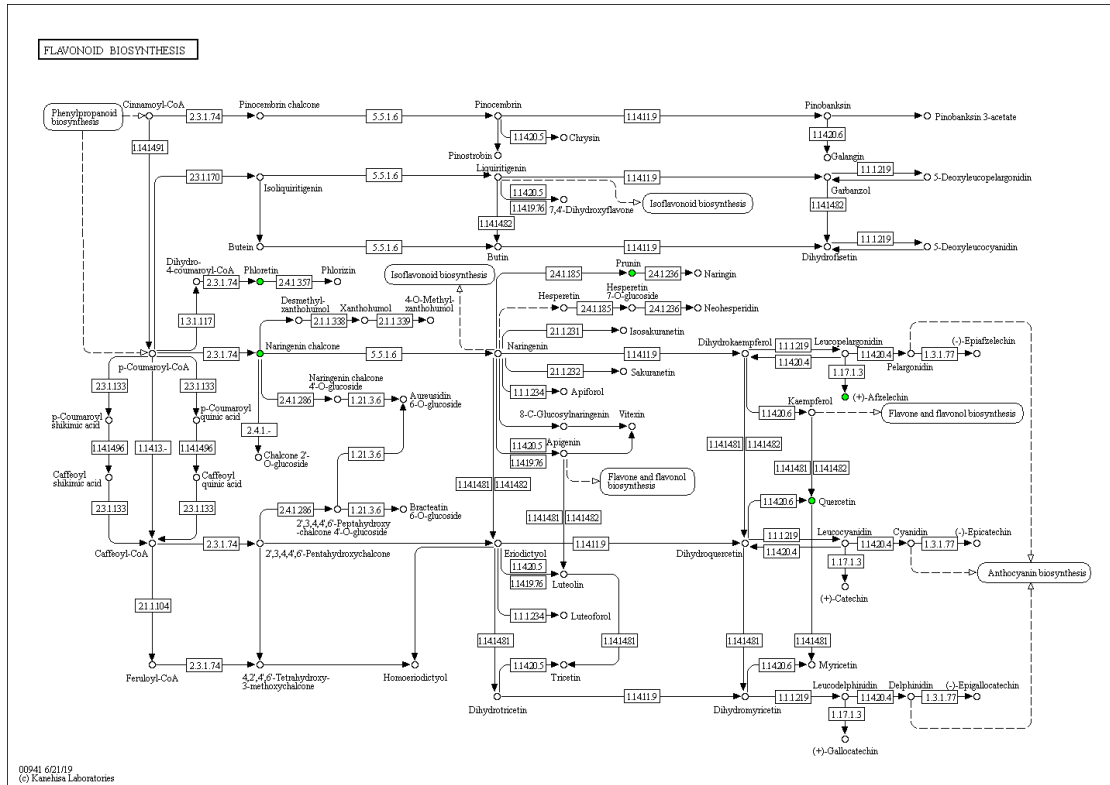

Figure S5. Differential metabolites of PS3 vs PS2 group in flavonoid biosynthesis pathway.

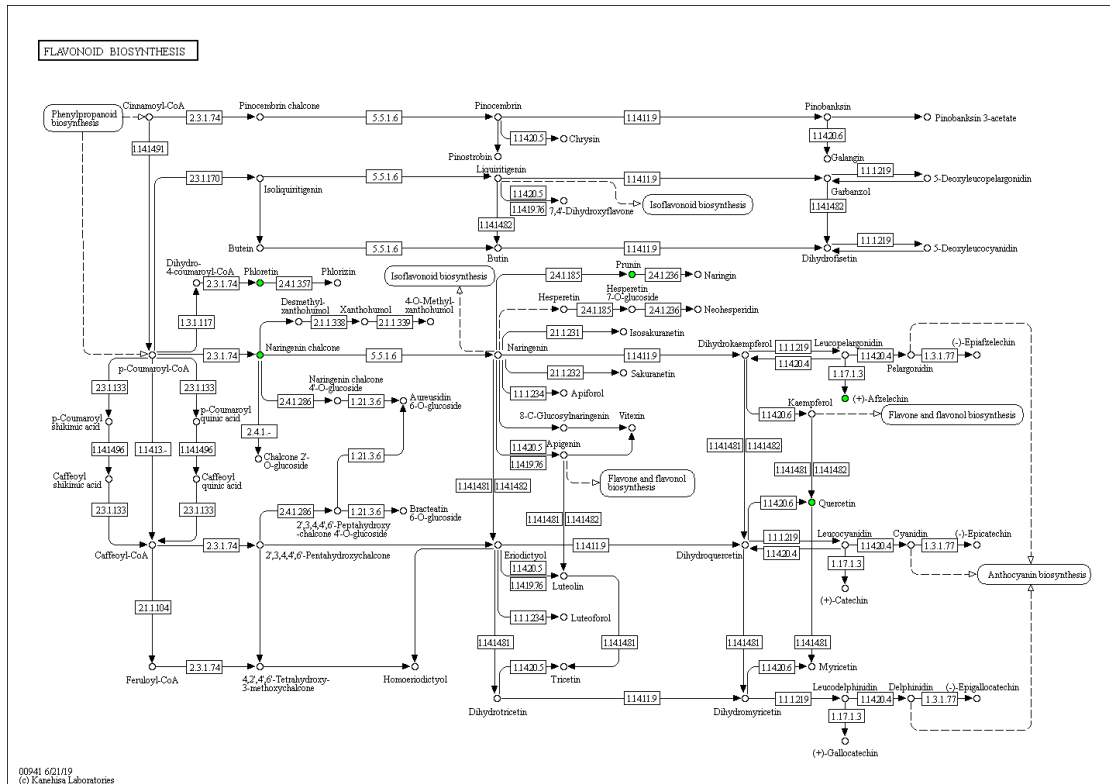

Figure S6. Differential metabolites of PS3 vs PS2 group in phenylpropanoid biosynthesis pathway.

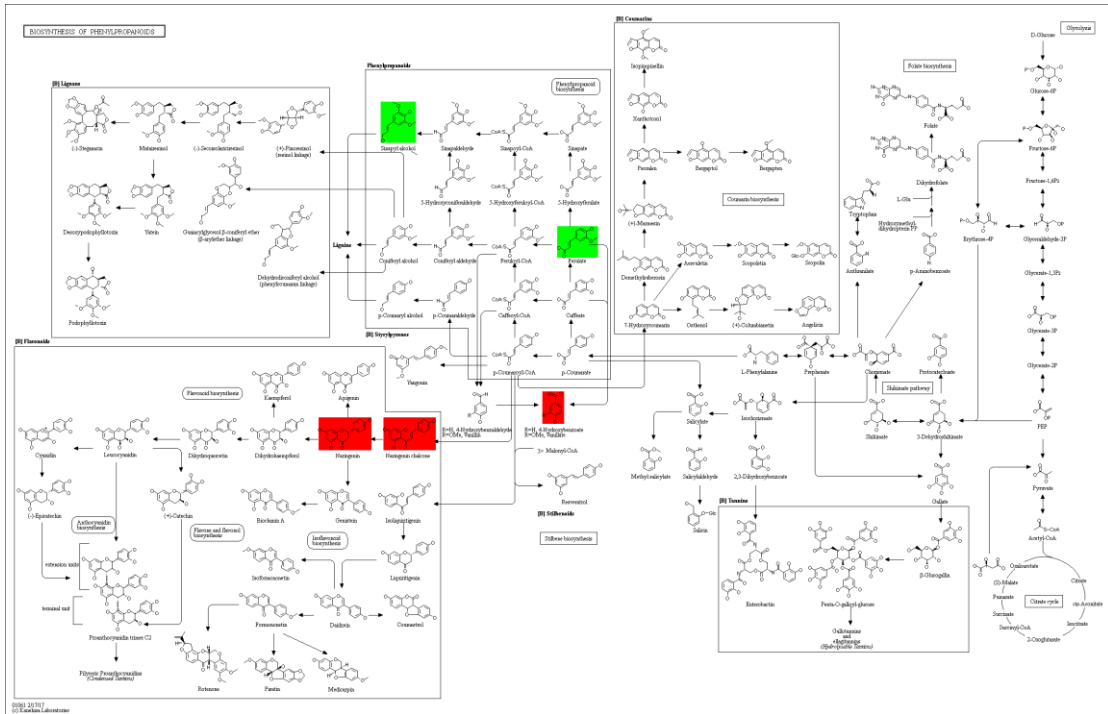

**Figure S7.** Differential metabolites of PS4 vs PS3 group in biosynthesis of phenylpropanoids pathway.

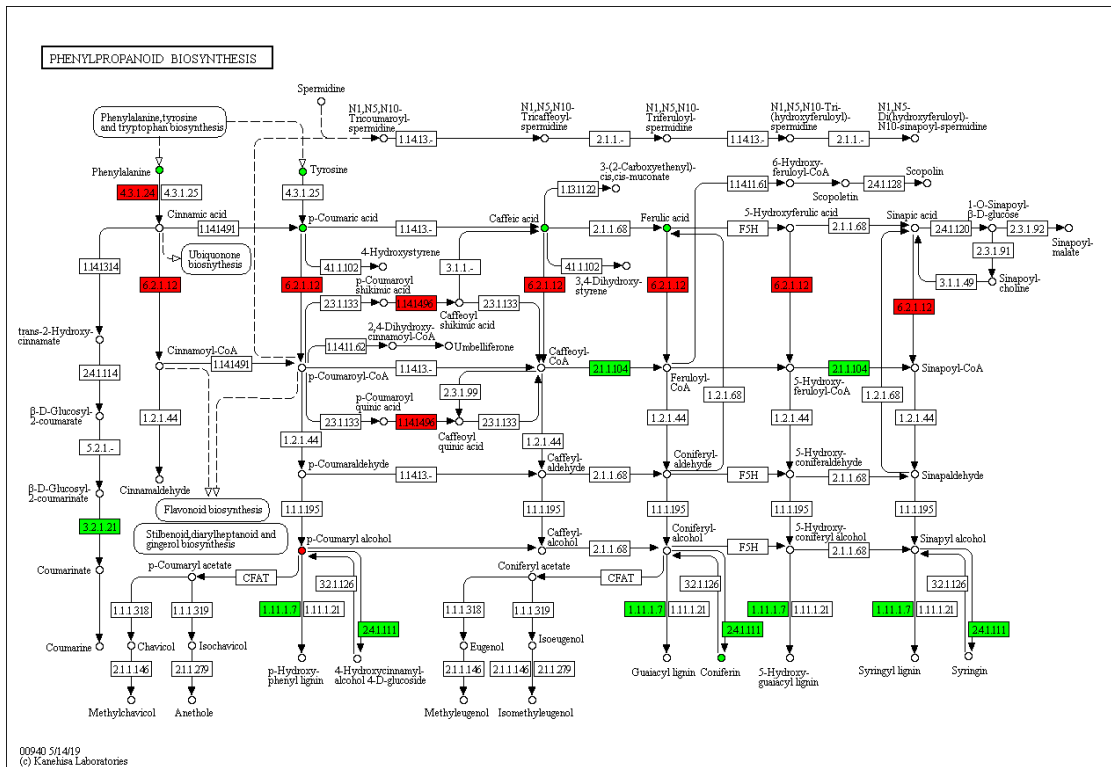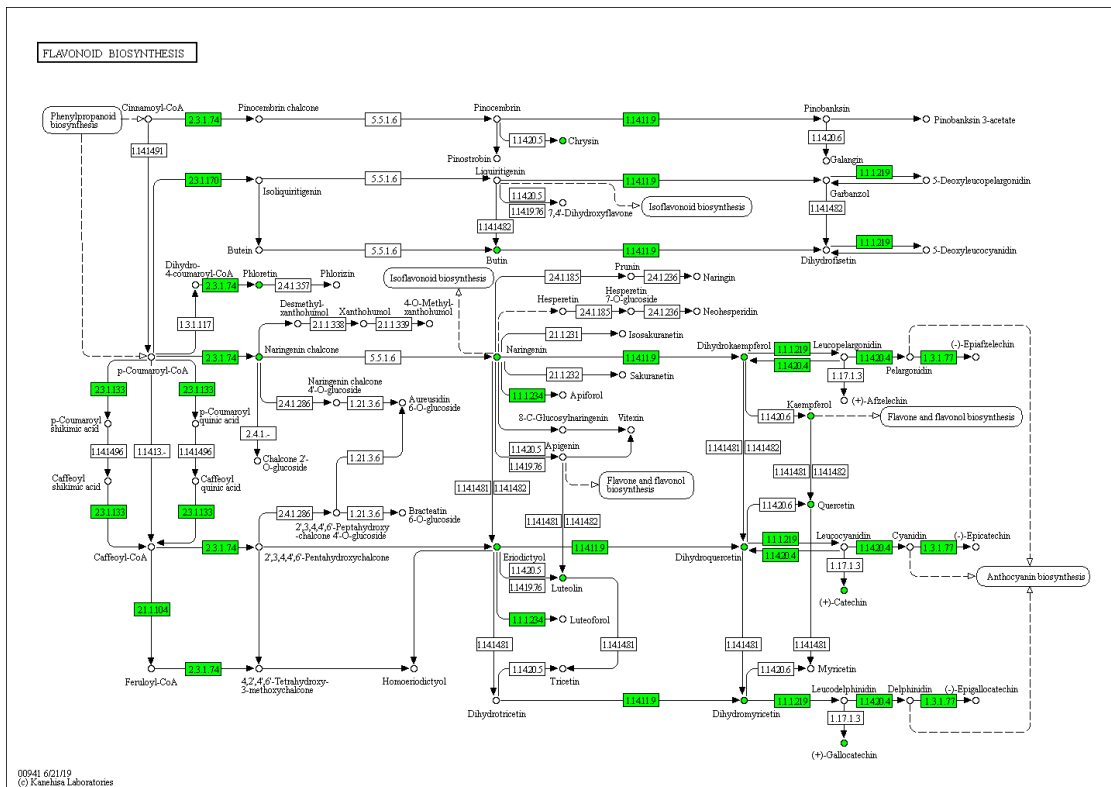

**Figure S8.** Differential metabolites of PS2 vs PS1 group in flavonoid biosynthesis pathway and phenylpropanoid biosynthesis pathway combined with RNA-seq results.

**Table S1.** A total of 462 detected metabolites in this study and their peak response areas along the developmental stages of apple fruit.

| Index   | Compounds                             | Class                  | mix0<br>1    | mix0<br>2    | mix0<br>3    | PS1a         | PS1b         | PS1c         | PS2a         | PS2b         | PS2c         | PS3a         | PS3b         | PS3c         | PS4a         | PS4b         | PS4c         | ID         |
|---------|---------------------------------------|------------------------|--------------|--------------|--------------|--------------|--------------|--------------|--------------|--------------|--------------|--------------|--------------|--------------|--------------|--------------|--------------|------------|
| Mad216  | Pantothenol                           | Alcohols and polyols   | 5.25E<br>+03 | 7.57E<br>+03 | 5.27E<br>+03 | 4.24E<br>+03 | 5.20E<br>+03 | 2.99E<br>+03 | 5.63E<br>+03 | 2.21E<br>+04 | 7.70E<br>+03 | 3.10E<br>+03 | 2.52E<br>+03 | 2.82E<br>+04 | 5.05E<br>+03 | 2.30E<br>+03 | 5.63E<br>+03 | --         |
| Mad55   | D-Sorbitol                            | Alcohols and polyols   | 4.75E<br>+06 | 4.94E<br>+06 | 5.63E<br>+06 | 5.45E<br>+06 | 5.87E<br>+06 | 5.79E<br>+06 | 5.33E<br>+06 | 4.37E<br>+06 | 4.04E<br>+06 | 6.23E<br>+06 | 5.83E<br>+06 | 5.01E<br>+06 | 4.19E<br>+06 | 4.52E<br>+06 | 4.74E<br>+06 | C00<br>794 |
| Mad56   | D-Mannitol                            | Alcohols and polyols   | 1.41E<br>+07 | 1.25E<br>+07 | 1.48E<br>+07 | 1.40E<br>+07 | 1.37E<br>+07 | 1.52E<br>+07 | 1.47E<br>+07 | 1.21E<br>+07 | 1.12E<br>+07 | 1.77E<br>+07 | 1.61E<br>+07 | 1.31E<br>+07 | 1.13E<br>+07 | 1.17E<br>+07 | 1.26E<br>+07 | C00<br>392 |
| Mad805  | Dulcitol                              | Alcohols and polyols   | 3.31E<br>+06 | 3.09E<br>+06 | 2.93E<br>+06 | 3.75E<br>+06 | 3.58E<br>+06 | 3.43E<br>+06 | 4.65E<br>+06 | 4.65E<br>+06 | 3.37E<br>+06 | 5.86E<br>+06 | 5.72E<br>+06 | 4.46E<br>+06 | 2.82E<br>+06 | 2.99E<br>+06 | 3.08E<br>+06 | C01<br>697 |
| Mad850  | 1,5-Anhydro-D-glucitol                | Alcohols and polyols   | 4.71E<br>+04 | 3.10E<br>+04 | 3.42E<br>+04 | 9.00E<br>+00 | 9.00E<br>+00 | 9.00E<br>+00 | 7.06E<br>+04 | 7.99E<br>+04 | 7.22E<br>+04 | 7.58E<br>+04 | 4.79E<br>+04 | 5.93E<br>+04 | 6.64E<br>+04 | 1.25E<br>+05 | 9.85E<br>+04 | --         |
| Mad100  | Piperidine                            | Alkaloids              | 1.40E<br>+06 | 1.43E<br>+06 | 1.63E<br>+06 | 1.12E<br>+06 | 1.15E<br>+06 | 8.49E<br>+05 | 2.45E<br>+05 | 4.19E<br>+05 | 5.20E<br>+05 | 1.29E<br>+06 | 8.42E<br>+05 | 8.38E<br>+05 | 2.29E<br>+06 | 4.48E<br>+06 | 3.98E<br>+06 | C01<br>746 |
| Mad1121 | Isohemiphloin                         | Alkaloids              | 1.57E<br>+05 | 1.33E<br>+05 | 1.44E<br>+05 | 1.83E<br>+05 | 2.01E<br>+05 | 1.83E<br>+05 | 2.90E<br>+05 | 1.71E<br>+05 | 1.29E<br>+05 | 1.18E<br>+05 | 6.25E<br>+04 | 8.37E<br>+04 | 1.01E<br>+05 | 1.05E<br>+05 | 7.15E<br>+04 | --         |
| Mad80   | Betaine                               | Alkaloids              | 1.98E<br>+05 | 2.35E<br>+05 | 2.28E<br>+05 | 1.04E<br>+06 | 4.26E<br>+05 | 5.14E<br>+05 | 1.27E<br>+05 | 1.46E<br>+05 | 1.40E<br>+05 | 9.63E<br>+04 | 1.28E<br>+05 | 1.10E<br>+05 | 2.71E<br>+05 | 2.99E<br>+05 | 2.01E<br>+05 | C00<br>719 |
| Mad221  | Theobromine                           | Alkaloids              | 1.08E<br>+04 | 1.73E<br>+04 | 8.09E<br>+03 | 2.76E<br>+04 | 3.14E<br>+04 | 3.64E<br>+04 | 8.24E<br>+03 | 7.67E<br>+03 | 7.35E<br>+03 | 5.07E<br>+03 | 9.00E<br>+00 | 6.54E<br>+03 | 1.38E<br>+04 | 5.73E<br>+03 | 4.46E<br>+03 | C07<br>480 |
| Mad72   | Trigonelline                          | Alkaloids              | 2.44E<br>+06 | 1.90E<br>+06 | 2.37E<br>+06 | 7.22E<br>+06 | 6.53E<br>+06 | 6.65E<br>+06 | 1.02E<br>+06 | 1.47E<br>+06 | 1.71E<br>+06 | 5.34E<br>+05 | 3.58E<br>+05 | 2.15E<br>+05 | 2.55E<br>+06 | 2.11E<br>+06 | 1.26E<br>+06 | C01<br>004 |
| Mad1028 | Aminophylline                         | Alkaloids              | 6.33E<br>+05 | 6.22E<br>+05 | 6.16E<br>+05 | 9.96E<br>+05 | 1.11E<br>+06 | 1.11E<br>+06 | 2.52E<br>+05 | 3.38E<br>+05 | 4.07E<br>+05 | 1.99E<br>+05 | 2.06E<br>+05 | 4.05E<br>+05 | 6.81E<br>+05 | 4.41E<br>+05 | 3.89E<br>+05 | --         |
| Mad75   | Aspartic acid di-O-glucoside          | Amino acid derivatives | 1.55E<br>+05 | 1.34E<br>+05 | 1.74E<br>+05 | 4.71E<br>+04 | 4.86E<br>+04 | 5.60E<br>+04 | 1.49E<br>+05 | 2.21E<br>+05 | 3.16E<br>+05 | 1.09E<br>+05 | 1.87E<br>+05 | 8.55E<br>+04 | 1.75E<br>+05 | 2.24E<br>+05 | 1.65E<br>+05 | --         |
| Mad489  | L-Glutamyl-L-valyl-L-valyl-L-cysteine | Amino acid derivatives | 9.96E<br>+04 | 1.16E<br>+05 | 1.17E<br>+05 | 4.04E<br>+04 | 4.89E<br>+04 | 4.89E<br>+04 | 1.42E<br>+05 | 1.30E<br>+05 | 1.47E<br>+05 | 2.05E<br>+05 | 2.55E<br>+05 | 2.13E<br>+05 | 2.29E<br>+05 | 1.74E<br>+05 | 1.91E<br>+05 | --         |
| Mad1151 | Acetyl tryptophan                     | Amino acid derivatives | 1.32E<br>+07 | 1.25E<br>+07 | 1.34E<br>+07 | 5.53E<br>+05 | 3.70E<br>+05 | 3.35E<br>+05 | 5.94E<br>+05 | 1.02E<br>+06 | 8.27E<br>+06 | 1.14E<br>+06 | 1.63E<br>+06 | 1.50E<br>+06 | 2.74E<br>+06 | 2.16E<br>+06 | 1.70E<br>+06 | --         |
| Mad836  | L-Glutamic acid O-glucoside           | Amino acid derivatives | 6.52E<br>+04 | 1.23E<br>+05 | 8.65E<br>+04 | 2.65E<br>+05 | 1.64E<br>+05 | 3.43E<br>+05 | 6.56E<br>+04 | 2.43E<br>+04 | 5.33E<br>+04 | 1.38E<br>+04 | 1.89E<br>+04 | 2.49E<br>+04 | 2.69E<br>+04 | 3.54E<br>+04 | 3.38E<br>+04 | --         |
| Mad1154 | 3-(2-Naphthyl)-D-alanine              | Amino acid derivatives | 2.31E<br>+04 | 2.82E<br>+04 | 3.30E<br>+04 | 1.32E<br>+04 | 1.97E<br>+04 | 2.94E<br>+04 | 2.45E<br>+04 | 5.41E<br>+04 | 2.73E<br>+04 | 3.92E<br>+04 | 6.15E<br>+04 | 3.67E<br>+04 | 3.38E<br>+04 | 2.08E<br>+04 | 2.50E<br>+04 | --         |
| Mad881  | Glutathione oxidized                  | Amino acid derivatives | 1.19E<br>+05 | 1.05E<br>+05 | 1.03E<br>+05 | 2.54E<br>+05 | 2.16E<br>+05 | 2.04E<br>+05 | 8.21E<br>+04 | 1.01E<br>+05 | 1.15E<br>+05 | 4.65E<br>+04 | 3.18E<br>+04 | 1.06E<br>+04 | 6.75E<br>+04 | 3.58E<br>+04 | 2.68E<br>+04 | C00<br>127 |
| Mad197  | L-Kynurenine                          | Amino acid derivatives | 1.67E<br>+04 | 1.16E<br>+04 | 1.32E<br>+04 | 1.74E<br>+04 | 1.34E<br>+04 | 1.71E<br>+04 | 8.57E<br>+03 | 1.54E<br>+04 | 2.10E<br>+04 | 9.70E<br>+03 | 1.45E<br>+04 | 1.16E<br>+04 | 1.34E<br>+04 | 1.06E<br>+04 | 1.50E<br>+04 | C00<br>328 |
| Mad1025 | 2,3-dimethylsuccinic acid             | Amino acid derivatives | 4.19E<br>+04 | 5.16E<br>+04 | 6.05E<br>+04 | 3.16E<br>+04 | 5.50E<br>+04 | 3.39E<br>+04 | 3.37E<br>+04 | 2.84E<br>+04 | 2.59E<br>+04 | 1.02E<br>+05 | 5.14E<br>+04 | 1.40E<br>+05 | 5.72E<br>+04 | 3.52E<br>+04 | 4.38E<br>+04 | --         |
| Mad132  | N-Acetyl-L-glutamic acid              | Amino acid derivatives | 1.93E<br>+05 | 2.10E<br>+05 | 2.19E<br>+05 | 4.33E<br>+05 | 4.47E<br>+05 | 4.36E<br>+05 | 2.84E<br>+05 | 2.51E<br>+05 | 1.68E<br>+05 | 5.19E<br>+04 | 1.17E<br>+05 | 3.72E<br>+04 | 1.05E<br>+05 | 8.75E<br>+04 | 5.41E<br>+04 | C00<br>624 |
| Mad121  | γ-Glu-Cys                             | Amino acid derivatives | 1.68E<br>+04 | 1.19E<br>+04 | 7.34E<br>+03 | 2.57E<br>+04 | 1.06E<br>+05 | 9.00E<br>+00 | 9.00E<br>+00 | 8.40E<br>+03 | 1.05E<br>+04 | 6.67E<br>+03 | 9.76E<br>+03 | 9.00E<br>+00 | 9.00E<br>+00 | 9.00E<br>+00 | 4.09E<br>+03 | C00<br>669 |
| Mad35   | 5-Aminovaleric acid                   | Amino acid derivatives | 1.74E<br>+04 | 1.59E<br>+04 | 1.55E<br>+04 | 5.47E<br>+04 | 4.86E<br>+04 | 7.88E<br>+04 | 1.14E<br>+04 | 1.40E<br>+04 | 1.66E<br>+04 | 6.71E<br>+03 | 9.00E<br>+00 | 5.14E<br>+03 | 1.76E<br>+04 | 1.27E<br>+04 | 1.65E<br>+04 | C00<br>431 |

|         |                                             |                        |          |          |          |          |          |          |          |          |          |          |          |          |          |          |          |     |     |
|---------|---------------------------------------------|------------------------|----------|----------|----------|----------|----------|----------|----------|----------|----------|----------|----------|----------|----------|----------|----------|-----|-----|
| Mad122  | N6-Acetyl-L-lysine                          | Amino acid derivatives | 2.22E+04 | 2.44E+04 | 2.58E+04 | 4.14E+04 | 5.29E+04 | 3.12E+04 | 9.00E+00 | 2.21E+04 | 2.36E+04 | 6.97E+03 | 2.05E+04 | 2.57E+04 | 3.16E+04 | 2.16E+04 | 2.74E+04 | C02 | 727 |
| Mad66   | Glycyl-L-proline                            | Amino acid derivatives | 9.63E+03 | 1.13E+04 | 1.06E+04 | 2.49E+04 | 2.18E+04 | 2.27E+04 | 6.29E+03 | 6.15E+03 | 8.60E+03 | 3.90E+03 | 4.78E+03 | 3.68E+03 | 4.74E+03 | 9.00E+00 | 9.00E+00 | --  | --  |
| Mad1016 | Asp-phe                                     | Amino acid derivatives | 4.10E+04 | 4.65E+04 | 4.36E+04 | 4.35E+04 | 5.12E+04 | 5.40E+04 | 5.84E+04 | 5.05E+04 | 5.39E+04 | 3.58E+04 | 1.89E+04 | 2.12E+04 | 3.22E+04 | 2.21E+04 | 2.21E+04 | --  | --  |
| Mad893  | Nα-Acetyl-L-glutamine                       | Amino acid derivatives | 4.45E+05 | 4.53E+05 | 4.46E+05 | 3.74E+05 | 3.84E+05 | 5.34E+05 | 4.41E+05 | 4.71E+05 | 4.52E+05 | 4.45E+05 | 4.30E+05 | 3.04E+05 | 9.03E+05 | 5.22E+05 | 4.16E+05 | --  | --  |
| Mad1148 | N-γ-Acetyl-N-2-Formyl-5-methoxykynurenamine | Amino acid derivatives | 2.01E+04 | 1.85E+04 | 2.00E+04 | 5.11E+04 | 4.25E+04 | 3.27E+04 | 6.96E+03 | 9.35E+03 | 5.33E+03 | 7.56E+03 | 6.39E+03 | 6.54E+03 | 1.37E+04 | 4.15E+03 | 9.24E+03 | C05 | 642 |
| Mad926  | N-Propionylglycine                          | Amino acid derivatives | 1.41E+05 | 1.35E+05 | 1.48E+05 | 2.63E+05 | 2.12E+05 | 2.39E+05 | 1.15E+05 | 1.27E+05 | 1.43E+05 | 1.04E+05 | 7.40E+04 | 8.23E+04 | 6.04E+04 | 3.54E+04 | 3.53E+04 | --  | --  |
| Mad19   | 1-Methylhistidine                           | Amino acid derivatives | 8.07E+04 | 9.79E+04 | 1.06E+05 | 2.04E+05 | 2.15E+05 | 2.27E+05 | 3.68E+04 | 7.67E+04 | 7.32E+04 | 3.68E+04 | 4.05E+04 | 2.78E+04 | 4.45E+04 | 4.60E+04 | 5.02E+04 | C01 | 152 |
| Mad190  | N-Glycyl-L-leucine                          | Amino acid derivatives | 1.58E+04 | 1.52E+04 | 1.77E+04 | 4.29E+04 | 5.92E+04 | 5.53E+04 | 7.80E+03 | 1.03E+04 | 8.71E+03 | 7.66E+03 | 6.44E+03 | 9.00E+03 | 1.26E+04 | 7.35E+03 | 8.21E+03 | --  | --  |
| Mad1112 | N-Acetyl-L-leucine                          | Amino acid derivatives | 3.49E+04 | 2.99E+04 | 3.34E+04 | 2.76E+04 | 4.00E+04 | 3.25E+04 | 1.61E+04 | 1.48E+04 | 1.53E+04 | 2.40E+04 | 2.32E+04 | 1.86E+04 | 5.55E+04 | 7.44E+04 | 9.59E+04 | --  | --  |
| Mad786  | 2,6-Diaminoimelic acid                      | Amino acid derivatives | 2.01E+06 | 2.04E+06 | 2.08E+06 | 4.34E+06 | 6.48E+06 | 4.86E+06 | 4.58E+05 | 3.02E+05 | 2.63E+05 | 8.81E+04 | 6.62E+04 | 1.32E+05 | 1.54E+05 | 1.02E+05 | 1.28E+05 | C00 | 666 |
| Mad104  | Glutathione reduced form                    | Amino acid derivatives | 1.81E+06 | 1.77E+06 | 1.91E+06 | 1.54E+06 | 4.78E+06 | 8.55E+06 | 6.60E+03 | 4.31E+06 | 4.02E+06 | 2.12E+06 | 3.48E+06 | 6.09E+06 | 6.51E+06 | 1.38E+06 | 1.42E+06 | C00 | 051 |
| Mad915  | S-(methyl)glutathione                       | Amino acid derivatives | 3.13E+04 | 6.28E+04 | 4.79E+04 | 4.95E+04 | 4.67E+04 | 6.34E+04 | 7.76E+04 | 5.90E+04 | 6.25E+04 | 5.34E+04 | 5.27E+04 | 4.66E+04 | 2.92E+04 | 1.72E+04 | 1.24E+04 | --  | --  |
| Mad927  | S-(5'-Adenosyl)-L-homocysteine              | Amino acid derivatives | 1.37E+04 | 1.17E+04 | 1.56E+04 | 2.06E+04 | 3.14E+04 | 1.77E+04 | 1.54E+04 | 1.72E+04 | 8.69E+03 | 6.59E+03 | 9.48E+03 | 9.00E+03 | 1.35E+04 | 6.85E+03 | 5.14E+03 | C00 | 021 |
| Mad868  | L-Pipecolic acid                            | Amino acid derivatives | 1.46E+04 | 8.34E+03 | 7.19E+03 | 1.30E+04 | 1.69E+04 | 1.80E+04 | 8.33E+03 | 9.48E+03 | 1.23E+04 | 2.74E+03 | 7.13E+03 | 5.67E+03 | 5.35E+03 | 4.96E+03 | 7.75E+03 | C00 | 408 |
| Mad53   | L-Saccharopine                              | Amino acid derivatives | 4.66E+05 | 5.46E+05 | 4.94E+05 | 4.72E+05 | 5.31E+05 | 4.60E+05 | 2.81E+05 | 3.30E+05 | 4.24E+05 | 4.58E+05 | 7.55E+05 | 8.24E+05 | 2.56E+05 | 1.77E+05 | 3.25E+05 | C00 | 449 |
| Mad17   | 3-N-Methyl-L-histidine                      | Amino acid derivatives | 8.95E+03 | 8.14E+03 | 5.63E+03 | 9.08E+03 | 9.77E+03 | 1.17E+04 | 9.62E+03 | 1.04E+04 | 1.08E+04 | 6.92E+03 | 5.56E+03 | 4.54E+03 | 7.25E+03 | 1.18E+04 | 1.04E+04 | --  | --  |
| Mad5    | Histamine                                   | Amino acid derivatives | 4.39E+05 | 3.80E+05 | 5.08E+05 | 1.09E+06 | 8.59E+05 | 1.10E+06 | 5.12E+05 | 2.95E+05 | 3.29E+05 | 1.75E+05 | 2.64E+05 | 2.22E+05 | 2.52E+05 | 2.35E+05 | 3.19E+05 | C00 | 388 |
| Mad1029 | N-Acetyl-L-tyrosine                         | Amino acid derivatives | 3.15E+04 | 3.81E+04 | 3.26E+04 | 9.00E+00 | 9.00E+00 | 9.00E+00 | 4.71E+04 | 4.68E+04 | 5.77E+04 | 5.78E+04 | 4.66E+04 | 4.75E+04 | 3.51E+04 | 4.44E+04 | 5.55E+04 | --  | --  |
| Mad885  | N-Acetylaspartate                           | Amino acid derivatives | 2.38E+04 | 2.35E+04 | 2.25E+04 | 2.22E+04 | 2.36E+04 | 2.25E+04 | 1.19E+04 | 1.75E+04 | 1.32E+04 | 2.55E+04 | 2.54E+04 | 1.77E+04 | 2.71E+04 | 4.27E+04 | 4.20E+04 | C01 | 042 |
| Mad865  | (5-L-Glutamyl)-L-amino acid                 | Amino acid derivatives | 3.21E+04 | 3.76E+04 | 3.54E+04 | 3.87E+04 | 3.14E+04 | 3.73E+04 | 4.44E+04 | 2.61E+04 | 3.54E+04 | 2.93E+04 | 2.43E+04 | 1.78E+04 | 4.30E+04 | 2.75E+04 | 2.48E+04 | C03 | 740 |
| Mad68   | Methionine sulfoxide                        | Amino acid derivatives | 6.11E+04 | 5.55E+04 | 8.04E+04 | 2.54E+04 | 2.11E+04 | 5.96E+04 | 1.87E+04 | 8.37E+04 | 1.03E+05 | 4.43E+04 | 6.52E+04 | 6.21E+04 | 3.99E+04 | 7.12E+04 | 7.58E+04 | --  | --  |
| Mad26   | S-(5'-Adenosyl)-L-methionine                | Amino acid derivatives | 8.29E+05 | 6.25E+05 | 7.70E+05 | 1.61E+06 | 1.51E+06 | 1.82E+06 | 4.75E+05 | 6.35E+05 | 7.01E+05 | 4.50E+05 | 5.26E+05 | 4.69E+05 | 4.07E+05 | 5.46E+05 | 5.11E+05 | C00 | 019 |
| Mad943  | 3-Hydroxy-3-methylpentane-1,5-dioic acid    | Amino acid derivatives | 2.05E+06 | 1.90E+06 | 1.86E+06 | 5.37E+06 | 8.85E+06 | 5.35E+06 | 2.26E+06 | 2.92E+06 | 2.09E+06 | 9.59E+05 | 1.06E+06 | 4.35E+05 | 1.83E+05 | 8.84E+05 | 1.08E+05 | --  | --  |
| Mad44   | 2-Aminoisobutyric acid                      | Amino acid derivatives | 5.76E+05 | 4.09E+05 | 5.67E+05 | 1.11E+06 | 1.41E+06 | 6.85E+06 | 1.83E+06 | 1.27E+06 | 2.12E+06 | 1.45E+06 | 1.50E+06 | 1.55E+06 | 1.88E+06 | 1.89E+06 | 1.81E+06 | --  | --  |
| Mad63   | N,N-Dimethylglycine                         | Amino acid derivatives | 2.29E+05 | 2.10E+05 | 2.08E+05 | 5.93E+05 | 7.22E+05 | 6.25E+05 | 2.08E+05 | 1.68E+05 | 1.52E+05 | 5.94E+04 | 1.24E+05 | 6.28E+04 | 1.08E+05 | 1.45E+05 | 9.10E+04 | C01 | 026 |



|        |                                          |                        |              |              |              |              |              |              |              |              |              |              |              |              |              |              |              |            |
|--------|------------------------------------------|------------------------|--------------|--------------|--------------|--------------|--------------|--------------|--------------|--------------|--------------|--------------|--------------|--------------|--------------|--------------|--------------|------------|
| Mad135 | 5-oxoproline                             | Amino acid derivatives | 3.21E<br>+06 | 3.04E<br>+06 | 3.93E<br>+06 | 6.45E<br>+06 | 1.35E<br>+07 | 8.53E<br>+06 | 7.29E<br>+05 | 1.07E<br>+06 | 1.48E<br>+06 | 4.01E<br>+05 | 6.09E<br>+05 | 6.93E<br>+05 | 1.29E<br>+06 | 1.16E<br>+06 | 8.97E<br>+05 | C01<br>879 |
| Mad126 | N-Acetylthreonine                        | Amino acid derivatives | 1.54E<br>+05 | 1.56E<br>+05 | 1.58E<br>+05 | 2.15E<br>+05 | 2.50E<br>+05 | 2.77E<br>+05 | 1.67E<br>+05 | 1.01E<br>+05 | 1.53E<br>+05 | 1.18E<br>+05 | 1.43E<br>+05 | 7.14E<br>+04 | 1.32E<br>+05 | 8.43E<br>+04 | 5.84E<br>+04 | --         |
| Mad21  | H-HomoArg-OH                             | Amino acid derivatives | 1.81E<br>+04 | 2.00E<br>+04 | 2.04E<br>+04 | 4.60E<br>+04 | 2.83E<br>+04 | 3.26E<br>+04 | 9.00E<br>+00 | 3.18E<br>+04 | 2.68E<br>+04 | 8.04E<br>+03 | 1.05E<br>+04 | 8.13E<br>+03 | 7.97E<br>+03 | 1.50E<br>+04 | 1.27E<br>+04 | --         |
| Mad74  | 2-Aminoadipic acid (L-Homoglutamic acid) | Amino acids            | 6.07E<br>+04 | 6.63E<br>+04 | 7.17E<br>+04 | 9.49E<br>+04 | 1.28E<br>+05 | 1.25E<br>+05 | 6.06E<br>+04 | 6.08E<br>+04 | 4.39E<br>+04 | 3.48E<br>+04 | 3.64E<br>+04 | 4.47E<br>+04 | 8.38E<br>+04 | 7.75E<br>+04 | 6.07E<br>+04 | C00<br>956 |
| Mad65  | L-Proline                                | Amino acids            | 4.75E<br>+06 | 3.87E<br>+06 | 5.23E<br>+06 | 8.88E<br>+06 | 8.55E<br>+06 | 8.38E<br>+06 | 3.57E<br>+06 | 6.77E<br>+06 | 9.35E<br>+06 | 1.60E<br>+06 | 3.17E<br>+06 | 2.12E<br>+06 | 2.12E<br>+06 | 2.88E<br>+06 | 1.91E<br>+06 | C00<br>148 |
| Mad39  | L-Citrulline                             | Amino acids            | 2.59E<br>+05 | 2.73E<br>+05 | 2.65E<br>+05 | 3.73E<br>+05 | 3.44E<br>+05 | 3.31E<br>+05 | 1.88E<br>+05 | 2.82E<br>+05 | 3.92E<br>+05 | 2.48E<br>+05 | 2.51E<br>+05 | 2.15E<br>+05 | 2.34E<br>+05 | 3.39E<br>+05 | 2.62E<br>+05 | C00<br>327 |
| Mad33  | L-Serine                                 | Amino acids            | 5.87E<br>+05 | 5.70E<br>+05 | 5.82E<br>+05 | 6.15E<br>+05 | 8.72E<br>+05 | 8.36E<br>+05 | 7.50E<br>+05 | 6.19E<br>+05 | 6.25E<br>+05 | 5.48E<br>+05 | 6.71E<br>+05 | 5.85E<br>+05 | 2.38E<br>+05 | 6.04E<br>+05 | 7.75E<br>+05 | C00<br>065 |
| Mad812 | L-Aspartic acid                          | Amino acids            | 2.52E<br>+06 | 2.68E<br>+06 | 2.55E<br>+06 | 1.36E<br>+06 | 1.21E<br>+06 | 1.48E<br>+06 | 5.62E<br>+06 | 5.15E<br>+06 | 7.20E<br>+06 | 4.62E<br>+06 | 4.84E<br>+06 | 2.87E<br>+06 | 7.70E<br>+06 | 1.14E<br>+07 | 1.23E<br>+07 | C00<br>049 |
| Mad813 | L-Glutamic acid                          | Amino acids            | 4.23E<br>+06 | 4.05E<br>+06 | 4.18E<br>+06 | 4.07E<br>+06 | 3.67E<br>+06 | 4.27E<br>+06 | 8.00E<br>+06 | 6.66E<br>+06 | 7.37E<br>+06 | 3.28E<br>+06 | 5.22E<br>+06 | 2.93E<br>+06 | 6.68E<br>+06 | 1.08E<br>+07 | 8.77E<br>+06 | C00<br>025 |
| Mad141 | L-Leucine                                | Amino acids            | 8.95E<br>+06 | 7.63E<br>+06 | 9.16E<br>+06 | 1.29E<br>+07 | 1.30E<br>+07 | 1.18E<br>+07 | 4.19E<br>+06 | 6.81E<br>+06 | 8.85E<br>+06 | 4.79E<br>+06 | 4.74E<br>+06 | 5.98E<br>+06 | 9.00E<br>+00 | 9.00E<br>+00 | 9.00E<br>+00 | C00<br>123 |
| Mad196 | L-Phenylalanine                          | Amino acids            | 3.27E<br>+07 | 3.12E<br>+07 | 3.21E<br>+07 | 2.95E<br>+07 | 3.11E<br>+07 | 3.29E<br>+07 | 3.87E<br>+07 | 3.79E<br>+07 | 3.76E<br>+07 | 1.50E<br>+07 | 1.41E<br>+07 | 1.59E<br>+07 | 1.54E<br>+07 | 1.39E<br>+07 | 1.23E<br>+07 | C00<br>079 |
| Mad793 | L-Threonine                              | Amino acids            | 8.85E<br>+04 | 9.34E<br>+04 | 1.03E<br>+05 | 7.19E<br>+04 | 7.56E<br>+04 | 6.16E<br>+04 | 9.14E<br>+04 | 1.35E<br>+05 | 1.93E<br>+05 | 1.36E<br>+05 | 1.65E<br>+05 | 1.04E<br>+05 | 2.00E<br>+05 | 2.77E<br>+05 | 1.63E<br>+05 | C00<br>188 |
| Mad15  | L-(+)-Lysine                             | Amino acids            | 3.03E<br>+05 | 2.87E<br>+05 | 3.13E<br>+05 | 2.52E<br>+05 | 2.67E<br>+05 | 2.66E<br>+05 | 1.80E<br>+05 | 3.07E<br>+05 | 3.71E<br>+05 | 2.97E<br>+05 | 1.89E<br>+05 | 2.49E<br>+05 | 2.93E<br>+05 | 4.51E<br>+05 | 4.59E<br>+05 | C00<br>047 |
| Mad781 | L-Histidine                              | Amino acids            | 2.95E<br>+04 | 2.80E<br>+04 | 2.77E<br>+04 | 7.21E<br>+03 | 8.22E<br>+03 | 7.70E<br>+03 | 8.53E<br>+03 | 2.97E<br>+04 | 6.63E<br>+04 | 1.80E<br>+04 | 2.54E<br>+04 | 2.22E<br>+04 | 3.28E<br>+04 | 7.41E<br>+04 | 4.85E<br>+04 | C00<br>135 |
| Mad78  | L-Valine                                 | Amino acids            | 1.22E<br>+07 | 1.04E<br>+07 | 1.34E<br>+07 | 2.30E<br>+07 | 2.25E<br>+07 | 2.00E<br>+07 | 6.74E<br>+06 | 1.06E<br>+07 | 1.28E<br>+07 | 5.24E<br>+06 | 5.97E<br>+06 | 7.52E<br>+06 | 7.72E<br>+06 | 1.42E<br>+07 | 8.95E<br>+06 | C00<br>183 |
| Mad131 | L-Isoleucine                             | Amino acids            | 1.92E<br>+07 | 1.95E<br>+07 | 2.04E<br>+07 | 1.57E<br>+07 | 1.78E<br>+07 | 1.44E<br>+07 | 5.68E<br>+06 | 9.23E<br>+06 | 1.08E<br>+07 | 1.61E<br>+07 | 1.40E<br>+07 | 1.46E<br>+07 | 2.30E<br>+07 | 2.33E<br>+07 | 2.37E<br>+07 | C00<br>407 |
| Mad784 | L-(+)-Arginine                           | Amino acids            | 9.83E<br>+04 | 1.01E<br>+05 | 9.75E<br>+04 | 5.74E<br>+04 | 4.15E<br>+04 | 4.16E<br>+04 | 4.08E<br>+04 | 3.13E<br>+05 | 2.12E<br>+05 | 1.06E<br>+05 | 6.75E<br>+04 | 4.44E<br>+04 | 7.36E<br>+04 | 1.26E<br>+05 | 8.29E<br>+04 | C00<br>062 |
| Mad796 | L-Homoserine                             | Amino acids            | 1.57E<br>+04 | 8.97E<br>+03 | 1.35E<br>+04 | 1.43E<br>+04 | 1.81E<br>+04 | 1.16E<br>+04 | 1.32E<br>+04 | 3.46E<br>+04 | 2.17E<br>+04 | 1.75E<br>+04 | 2.49E<br>+04 | 8.00E<br>+03 | 1.85E<br>+04 | 2.75E<br>+04 | 1.90E<br>+04 | C00<br>263 |
| Mad797 | L-Asparagine                             | Amino acids            | 9.38E<br>+06 | 1.03E<br>+07 | 1.03E<br>+07 | 7.84E<br>+06 | 6.47E<br>+06 | 8.04E<br>+06 | 1.12E<br>+07 | 1.54E<br>+07 | 1.99E<br>+07 | 1.63E<br>+07 | 1.87E<br>+07 | 1.20E<br>+07 | 2.08E<br>+07 | 2.43E<br>+07 | 2.62E<br>+07 | C00<br>152 |
| Mad61  | L-Cysteine                               | Amino acids            | 8.23E<br>+03 | 9.19E<br>+03 | 1.09E<br>+04 | 5.26E<br>+03 | 1.02E<br>+04 | 5.91E<br>+03 | 5.79E<br>+03 | 4.51E<br>+03 | 6.85E<br>+03 | 1.21E<br>+04 | 1.01E<br>+04 | 8.33E<br>+03 | 2.08E<br>+04 | 6.53E<br>+03 | 1.44E<br>+04 | C00<br>097 |
| Mad136 | L-Tyramine                               | Amino acids            | 1.24E<br>+04 | 1.13E<br>+04 | 1.53E<br>+04 | 1.05E<br>+05 | 9.00E<br>+00 | 4.64E<br>+03 | 8.93E<br>+03 | 5.45E<br>+03 | 4.89E<br>+03 | 9.00E<br>+00 | 6.59E<br>+03 | 7.75E<br>+03 | 9.20E<br>+03 | 3.26E<br>+03 | 3.14E<br>+03 | C00<br>483 |
| Mad894 | L(-)-Tyrosine                            | Amino acids            | 7.10E<br>+04 | 6.56E<br>+04 | 7.24E<br>+04 | 8.45E<br>+04 | 6.79E<br>+04 | 6.64E<br>+04 | 1.19E<br>+05 | 1.31E<br>+05 | 1.61E<br>+05 | 1.33E<br>+04 | 1.58E<br>+04 | 1.31E<br>+04 | 2.49E<br>+04 | 2.62E<br>+04 | 1.19E<br>+04 | C00<br>082 |
| Mad105 | L-Methionine                             | Amino acids            | 2.55E<br>+06 | 2.24E<br>+06 | 2.71E<br>+06 | 4.96E<br>+05 | 6.17E<br>+05 | 2.91E<br>+05 | 3.88E<br>+06 | 4.14E<br>+06 | 5.60E<br>+06 | 2.24E<br>+06 | 2.84E<br>+06 | 2.01E<br>+06 | 1.31E<br>+06 | 1.82E<br>+06 | 1.65E<br>+06 | C00<br>073 |
| Mad798 | L-Glutamine                              | Amino acids            | 2.34E<br>+04 | 2.59E<br>+04 | 2.55E<br>+04 | 1.35E<br>+04 | 1.19E<br>+04 | 1.41E<br>+04 | 5.33E<br>+04 | 6.47E<br>+04 | 7.26E<br>+04 | 3.80E<br>+04 | 7.40E<br>+04 | 1.64E<br>+04 | 7.64E<br>+04 | 1.07E<br>+05 | 1.01E<br>+05 | C00<br>064 |
| Mad42  | L-Alanine                                | Amino acids            | 8.42E<br>+05 | 7.97E<br>+05 | 8.79E<br>+05 | 1.81E<br>+06 | 1.94E<br>+06 | 1.99E<br>+06 | 6.59E<br>+05 | 8.00E<br>+05 | 9.06E<br>+05 | 3.11E<br>+05 | 5.35E<br>+05 | 4.48E<br>+05 | 3.08E<br>+05 | 5.74E<br>+05 | 3.62E<br>+05 | C00<br>041 |



|         |                                              |                      |              |              |              |              |              |              |              |              |              |              |              |              |              |              |              |            |
|---------|----------------------------------------------|----------------------|--------------|--------------|--------------|--------------|--------------|--------------|--------------|--------------|--------------|--------------|--------------|--------------|--------------|--------------|--------------|------------|
| Mad86   | N-Acetyl-D-glucosamine                       | Carbohydrates        | 2.58E<br>+05 | 2.86E<br>+05 | 2.97E<br>+05 | 3.60E<br>+05 | 3.66E<br>+05 | 4.36E<br>+05 | 2.26E<br>+05 | 1.54E<br>+05 | 1.73E<br>+05 | 1.62E<br>+05 | 2.03E<br>+05 | 2.01E<br>+05 | 2.92E<br>+05 | 1.61E<br>+05 | 1.75E<br>+05 | C00<br>140 |
| Mad860  | D-Glucose 6-phosphate                        | Carbohydrates        | 1.63E<br>+06 | 1.08E<br>+06 | 1.07E<br>+06 | 1.34E<br>+06 | 1.28E<br>+06 | 2.17E<br>+06 | 3.18E<br>+06 | 1.50E<br>+06 | 1.78E<br>+06 | 1.00E<br>+06 | 1.10E<br>+06 | 6.89E<br>+05 | 1.42E<br>+06 | 9.00E<br>+00 | 1.26E<br>+06 | C00<br>092 |
| Mad922  | D-Sedoheptuiose 7-phosphate                  | Carbohydrates        | 5.51E<br>+06 | 5.15E<br>+06 | 5.67E<br>+06 | 7.58E<br>+06 | 6.85E<br>+06 | 7.74E<br>+06 | 2.56E<br>+06 | 2.25E<br>+06 | 2.12E<br>+06 | 1.40E<br>+06 | 1.94E<br>+06 | 9.81E<br>+05 | 1.81E<br>+06 | 1.78E<br>+06 | 1.58E<br>+06 | --         |
| Mad839  | D-glucuronic acid                            | Carbohydrates        | 1.04E<br>+06 | 1.12E<br>+06 | 1.26E<br>+06 | 1.87E<br>+06 | 2.45E<br>+06 | 2.98E<br>+06 | 4.43E<br>+05 | 4.51E<br>+05 | 4.80E<br>+05 | 1.81E<br>+05 | 2.44E<br>+05 | 3.21E<br>+05 | 4.34E<br>+05 | 3.43E<br>+05 | 4.72E<br>+05 | C00<br>191 |
| Mad1033 | Protocatechuic acid O-glucoside              | Catechin derivatives | 1.03E<br>+06 | 9.70E<br>+05 | 1.08E<br>+06 | 9.17E<br>+05 | 9.70E<br>+05 | 8.86E<br>+05 | 1.33E<br>+06 | 8.62E<br>+05 | 8.10E<br>+05 | 8.87E<br>+05 | 1.30E<br>+06 | 9.35E<br>+05 | 1.30E<br>+06 | 1.40E<br>+06 | 1.56E<br>+06 | --         |
| Mad1111 | Catechin-catechin-catechin                   | Catechin derivatives | 4.15E<br>+06 | 3.98E<br>+06 | 4.01E<br>+06 | 8.45E<br>+06 | 9.28E<br>+06 | 8.30E<br>+06 | 1.37E<br>+06 | 6.87E<br>+05 | 7.24E<br>+05 | 3.53E<br>+05 | 2.32E<br>+05 | 3.38E<br>+05 | 6.05E<br>+05 | 3.90E<br>+05 | 2.51E<br>+05 | --         |
| Mad1116 | Epicatechin-epiafzelechin                    | Catechin derivatives | 1.07E<br>+06 | 9.37E<br>+05 | 9.72E<br>+05 | 1.13E<br>+06 | 1.14E<br>+06 | 1.12E<br>+06 | 1.39E<br>+06 | 1.16E<br>+06 | 1.13E<br>+06 | 9.84E<br>+05 | 6.78E<br>+05 | 8.12E<br>+05 | 1.53E<br>+06 | 7.60E<br>+05 | 5.07E<br>+05 | --         |
| Mad1054 | Catechin                                     | Catechin derivatives | 4.05E<br>+07 | 4.04E<br>+07 | 4.06E<br>+07 | 5.12E<br>+07 | 5.00E<br>+07 | 5.09E<br>+07 | 1.04E<br>+07 | 7.06E<br>+06 | 8.08E<br>+06 | 4.18E<br>+06 | 4.97E<br>+06 | 3.97E<br>+06 | 5.53E<br>+06 | 6.22E<br>+06 | 3.57E<br>+06 | C06<br>562 |
| Mad1082 | L-Epicatechin                                | Catechin derivatives | 5.14E<br>+07 | 5.10E<br>+07 | 5.06E<br>+07 | 6.12E<br>+07 | 6.06E<br>+07 | 6.26E<br>+07 | 4.57E<br>+07 | 4.15E<br>+07 | 4.00E<br>+07 | 3.42E<br>+07 | 2.72E<br>+07 | 3.04E<br>+07 | 3.70E<br>+07 | 3.07E<br>+07 | 2.27E<br>+07 | C09<br>727 |
| Mad1085 | Epigallate catechin gallate (EGCG)           | Catechin derivatives | 4.04E<br>+04 | 3.19E<br>+04 | 2.45E<br>+04 | 1.98E<br>+04 | 2.29E<br>+04 | 2.33E<br>+04 | 7.41E<br>+04 | 2.72E<br>+04 | 3.10E<br>+04 | 4.36E<br>+04 | 2.25E<br>+04 | 2.62E<br>+04 | 2.63E<br>+04 | 2.10E<br>+04 | 2.61E<br>+04 | C09<br>731 |
| Mad277  | Epigallocatechin (EGC)                       | Catechin derivatives | 5.56E<br>+05 | 5.37E<br>+05 | 5.05E<br>+05 | 7.21E<br>+05 | 5.98E<br>+05 | 9.18E<br>+05 | 4.22E<br>+05 | 2.76E<br>+05 | 6.51E<br>+05 | 7.55E<br>+04 | 1.58E<br>+05 | 4.87E<br>+05 | 1.03E<br>+06 | 3.74E<br>+05 | 1.14E<br>+05 | C12<br>136 |
| Mad1015 | (+)-Gallocatechin (GC)                       | Catechin derivatives | 5.93E<br>+04 | 4.83E<br>+04 | 4.08E<br>+04 | 1.11E<br>+05 | 1.42E<br>+05 | 8.67E<br>+04 | 7.90E<br>+03 | 1.32E<br>+04 | 1.65E<br>+04 | 1.76E<br>+04 | 2.89E<br>+04 | 1.52E<br>+04 | 2.28E<br>+04 | 2.83E<br>+04 | 2.61E<br>+04 | C12<br>127 |
| Mad1034 | Protocatechuic acid                          | Catechin derivatives | 8.87E<br>+05 | 8.44E<br>+05 | 7.80E<br>+05 | 2.25E<br>+06 | 2.38E<br>+06 | 2.05E<br>+06 | 2.90E<br>+05 | 1.18E<br>+05 | 1.83E<br>+05 | 1.05E<br>+05 | 1.18E<br>+05 | 1.96E<br>+05 | 1.83E<br>+05 | 2.96E<br>+05 | 1.50E<br>+05 | C00<br>230 |
| Mad1071 | Protocatechuic aldehyde                      | Catechin derivatives | 4.11E<br>+04 | 4.65E<br>+04 | 5.05E<br>+04 | 9.65E<br>+04 | 9.72E<br>+04 | 1.13E<br>+05 | 2.71E<br>+04 | 1.42E<br>+04 | 1.82E<br>+04 | 1.53E<br>+04 | 1.51E<br>+04 | 2.02E<br>+04 | 2.53E<br>+04 | 1.65E<br>+04 | 2.11E<br>+04 | C16<br>700 |
| Mad70   | sn-Glycero-3-phosphocholine                  | Cholines             | 6.31E<br>+05 | 7.16E<br>+05 | 6.52E<br>+05 | 1.07E<br>+06 | 9.65E<br>+05 | 1.32E<br>+06 | 5.18E<br>+05 | 2.54E<br>+05 | 4.35E<br>+05 | 2.95E<br>+05 | 3.07E<br>+05 | 2.38E<br>+05 | 6.83E<br>+05 | 6.64E<br>+05 | 7.35E<br>+05 | C00<br>670 |
| Mad59   | Choline                                      | Cholines             | 3.58E<br>+06 | 3.48E<br>+06 | 3.90E<br>+06 | 1.07E<br>+07 | 9.98E<br>+06 | 5.84E<br>+06 | 1.90E<br>+06 | 1.32E<br>+06 | 1.71E<br>+06 | 1.02E<br>+06 | 1.41E<br>+06 | 1.14E<br>+06 | 2.01E<br>+06 | 2.11E<br>+06 | 1.58E<br>+06 | C00<br>114 |
| Mad46   | O-Phosphocholine                             | Cholines             | 6.96E<br>+05 | 8.35E<br>+05 | 8.58E<br>+05 | 1.79E<br>+06 | 1.90E<br>+06 | 2.29E<br>+06 | 1.21E<br>+05 | 1.01E<br>+05 | 1.49E<br>+04 | 1.47E<br>+04 | 1.30E<br>+03 | 8.88E<br>+04 | 1.82E<br>+04 | 2.91E<br>+04 | 3.48E<br>+04 | C00<br>588 |
| Mad52   | Acetylcholine                                | Cholines             | 3.37E<br>+05 | 3.07E<br>+05 | 3.47E<br>+05 | 4.66E<br>+05 | 5.29E<br>+05 | 5.65E<br>+05 | 3.09E<br>+05 | 3.05E<br>+05 | 3.14E<br>+05 | 3.23E<br>+05 | 3.17E<br>+05 | 2.78E<br>+05 | 2.71E<br>+05 | 2.53E<br>+05 | 3.17E<br>+05 | --         |
| Mad447  | O-Feruloyl 4-hydroxylcoumarin                | Coumarins            | 4.02E<br>+04 | 5.92E<br>+04 | 5.63E<br>+04 | 2.01E<br>+04 | 2.84E<br>+04 | 2.10E<br>+04 | 1.27E<br>+05 | 9.03E<br>+04 | 6.10E<br>+04 | 6.33E<br>+04 | 3.23E<br>+04 | 3.05E<br>+04 | 4.85E<br>+04 | 5.86E<br>+04 | 3.19E<br>+04 | --         |
| Mad289  | 6,7-dihydroxycoumarin 6-O-quinic acid        | Coumarins            | 5.39E<br>+05 | 7.60E<br>+05 | 9.48E<br>+05 | 6.55E<br>+05 | 8.28E<br>+05 | 6.90E<br>+05 | 4.93E<br>+05 | 6.14E<br>+05 | 7.00E<br>+05 | 5.55E<br>+05 | 5.92E<br>+05 | 6.86E<br>+05 | 5.04E<br>+05 | 4.65E<br>+05 | 5.41E<br>+05 | --         |
| Mad331  | O-Feruloyl 2-hydroxylcoumarin                | Coumarins            | 5.64E<br>+04 | 5.28E<br>+04 | 6.62E<br>+04 | 1.20E<br>+04 | 1.42E<br>+04 | 1.37E<br>+04 | 1.18E<br>+05 | 1.04E<br>+05 | 1.03E<br>+05 | 1.22E<br>+05 | 7.30E<br>+04 | 9.71E<br>+04 | 1.50E<br>+05 | 1.20E<br>+05 | 7.15E<br>+04 | --         |
| Mad1096 | 4-hydroxycoumarin di-glucoside               | Coumarins            | 1.26E<br>+04 | 1.58E<br>+04 | 1.76E<br>+04 | 9.00E<br>+00 | 9.00E<br>+00 | 9.00E<br>+00 | 9.00E<br>+00 | 9.00E<br>+00 | 9.00E<br>+00 | 9.00E<br>+00 | 9.00E<br>+00 | 9.00E<br>+00 | 2.00E<br>+04 | 1.47E<br>+05 | 1.26E<br>+05 | --         |
| Mad1020 | Esculetin O-quinacyl esculetin O-quinic acid | Coumarins            | 2.37E<br>+06 | 4.06E<br>+06 | 4.36E<br>+06 | 2.41E<br>+06 | 2.40E<br>+06 | 9.00E<br>+00 | 9.00E<br>+00 | 9.00E<br>+00 | 3.22E<br>+06 | 2.67E<br>+06 | 2.07E<br>+06 | 2.66E<br>+06 | 2.61E<br>+06 | 1.75E<br>+06 | 2.28E<br>+06 | --         |
| Mad347  | Esculetin (6,7-dihydroxycoumarin)            | Coumarins            | 6.52E<br>+04 | 7.46E<br>+04 | 9.34E<br>+04 | 9.00E<br>+00 | 9.00E<br>+00 | 9.00E<br>+00 | 1.00E<br>+05 | 9.21E<br>+04 | 7.04E<br>+04 | 8.17E<br>+04 | 1.26E<br>+05 | 1.08E<br>+05 | 1.25E<br>+05 | 7.05E<br>+04 | 4.88E<br>+04 | C09<br>263 |
| Mad388  | 6-Methoxy-7,8-DihydroxyCoumarin              | Coumarins            | 2.26E<br>+04 | 2.55E<br>+04 | 3.62E<br>+04 | 9.00E<br>+00 | 9.00E<br>+00 | 9.00E<br>+00 | 3.11E<br>+04 | 5.03E<br>+04 | 2.81E<br>+04 | 1.68E<br>+04 | 8.07E<br>+04 | 6.38E<br>+04 | 2.70E<br>+04 | 4.29E<br>+04 | 7.07E<br>+04 | --         |

|         |                                                 |           |              |              |              |              |              |              |              |              |              |              |              |              |              |              |              |            |
|---------|-------------------------------------------------|-----------|--------------|--------------|--------------|--------------|--------------|--------------|--------------|--------------|--------------|--------------|--------------|--------------|--------------|--------------|--------------|------------|
| Mad1037 | Esculin (6,7-Dihydroxycoumarin-6-glucoside)     | Coumarins | 3.94E<br>+05 | 4.35E<br>+05 | 4.07E<br>+05 | 5.45E<br>+05 | 5.71E<br>+05 | 5.33E<br>+05 | 4.40E<br>+05 | 2.50E<br>+05 | 1.83E<br>+05 | 8.60E<br>+05 | 3.36E<br>+05 | 3.33E<br>+05 | 4.34E<br>+05 | 4.63E<br>+05 | 3.71E<br>+05 | --         |
| Mad508  | Hesperetin 7-O-neohesperidoside (Neohesperidin) | Flavanone | 2.48E<br>+05 | 2.35E<br>+05 | 2.38E<br>+05 | 2.73E<br>+05 | 5.01E<br>+05 | 4.13E<br>+05 | 1.59E<br>+05 | 1.06E<br>+05 | 1.08E<br>+05 | 6.33E<br>+04 | 1.47E<br>+05 | 5.81E<br>+04 | 4.30E<br>+04 | 1.21E<br>+05 | 2.72E<br>+05 | C09<br>806 |
| Mad481  | Naringenin 7-O-neohesperidoside (Naringin)      | Flavanone | 2.52E<br>+04 | 5.63E<br>+04 | 4.90E<br>+04 | 4.09E<br>+04 | 5.95E<br>+04 | 9.78E<br>+04 | 3.62E<br>+04 | 1.90E<br>+04 | 3.14E<br>+04 | 2.62E<br>+04 | 1.36E<br>+04 | 2.04E<br>+04 | 3.57E<br>+04 | 1.95E<br>+04 | 1.27E<br>+04 | C09<br>789 |
| Mad1187 | Naringenin 7-O-glucoside (Prunin)               | Flavanone | 5.02E<br>+06 | 4.81E<br>+06 | 5.63E<br>+06 | 7.91E<br>+06 | 1.03E<br>+07 | 8.90E<br>+06 | 4.69E<br>+06 | 3.18E<br>+06 | 3.05E<br>+06 | 1.52E<br>+06 | 1.70E<br>+06 | 1.37E<br>+06 | 1.27E<br>+06 | 2.36E<br>+06 | 2.49E<br>+06 | C09<br>099 |
| Mad624  | Naringenin                                      | Flavanone | 1.96E<br>+05 | 2.05E<br>+05 | 2.13E<br>+05 | 6.11E<br>+05 | 9.39E<br>+05 | 5.51E<br>+05 | 9.00E<br>+00 | 9.00E<br>+00 | 9.00E<br>+00 | 9.00E<br>+00 | 9.00E<br>+00 | 9.00E<br>+00 | 9.00E<br>+00 | 1.28E<br>+04 | 9.00E<br>+00 | C00<br>509 |
| Mad623  | Phloretin                                       | Flavanone | 3.69E<br>+05 | 3.85E<br>+05 | 3.95E<br>+05 | 1.41E<br>+06 | 1.31E<br>+06 | 1.48E<br>+06 | 2.74E<br>+04 | 1.88E<br>+04 | 1.35E<br>+04 | 9.00E<br>+00 | 1.36E<br>+04 | 9.85E<br>+03 | 1.60E<br>+04 | 1.22E<br>+04 | 9.00E<br>+00 | --         |
| Mad595  | Eriodictyol                                     | Flavanone | 4.10E<br>+04 | 4.28E<br>+04 | 4.21E<br>+04 | 1.08E<br>+05 | 2.10E<br>+05 | 9.44E<br>+04 | 9.00E<br>+00 | 9.00E<br>+00 | 9.00E<br>+00 | 9.00E<br>+00 | 9.00E<br>+00 | 9.00E<br>+00 | 9.00E<br>+00 | 9.00E<br>+00 | 9.00E<br>+00 | C05<br>631 |
| Mad1165 | Hesperetin 5-O-glucoside                        | Flavanone | 6.90E<br>+07 | 6.96E<br>+07 | 6.90E<br>+07 | 7.40E<br>+07 | 7.83E<br>+07 | 7.57E<br>+07 | 6.94E<br>+07 | 6.59E<br>+07 | 6.01E<br>+07 | 5.56E<br>+07 | 5.84E<br>+07 | 5.07E<br>+07 | 4.29E<br>+07 | 6.73E<br>+07 | 7.03E<br>+07 | --         |
| Mad490  | Hesperetin 7-rutinoside (Hesperidin)            | Flavanone | 3.00E<br>+05 | 2.81E<br>+05 | 2.77E<br>+05 | 4.39E<br>+05 | 5.22E<br>+05 | 4.38E<br>+05 | 1.92E<br>+05 | 1.61E<br>+05 | 9.13E<br>+04 | 6.08E<br>+04 | 1.40E<br>+05 | 7.47E<br>+04 | 4.92E<br>+04 | 1.65E<br>+05 | 3.01E<br>+05 | --         |
| Mad1268 | Naringenin chalcone                             | Flavanone | 2.15E<br>+05 | 2.00E<br>+05 | 2.12E<br>+05 | 6.32E<br>+05 | 1.01E<br>+06 | 5.49E<br>+05 | 9.03E<br>+03 | 9.00E<br>+00 | 9.00E<br>+00 | 9.00E<br>+00 | 9.00E<br>+00 | 9.00E<br>+00 | 9.00E<br>+00 | 1.70E<br>+04 | 6.75E<br>+03 | C06<br>561 |
| Mad1246 | Isosakuranetin-7-neohesperidoside (Poncirin)    | Flavanone | 1.24E<br>+06 | 1.09E<br>+06 | 1.08E<br>+06 | 3.61E<br>+06 | 4.34E<br>+06 | 3.88E<br>+06 | 3.15E<br>+05 | 1.15E<br>+05 | 1.27E<br>+05 | 2.21E<br>+04 | 2.30E<br>+04 | 1.65E<br>+04 | 3.44E<br>+04 | 3.75E<br>+04 | 2.42E<br>+04 | --         |
| Mad365  | Afzelechin (3,5,7,4'-Tetrahydroxyflavan)        | Flavanone | 7.90E<br>+04 | 7.37E<br>+04 | 8.47E<br>+04 | 1.03E<br>+05 | 1.17E<br>+05 | 1.29E<br>+05 | 1.12E<br>+05 | 1.13E<br>+05 | 9.89E<br>+04 | 4.07E<br>+04 | 7.14E<br>+04 | 3.95E<br>+04 | 4.63E<br>+04 | 9.55E<br>+04 | 2.35E<br>+04 | C09<br>320 |
| Mad486  | Chrysoeriol 5-O-hexoside                        | Flavone   | 1.78E<br>+05 | 1.56E<br>+05 | 1.86E<br>+05 | 3.67E<br>+05 | 4.76E<br>+05 | 3.57E<br>+05 | 1.00E<br>+05 | 7.61E<br>+04 | 1.14E<br>+05 | 5.47E<br>+04 | 7.20E<br>+04 | 8.63E<br>+04 | 1.26E<br>+05 | 7.58E<br>+04 | 7.05E<br>+04 | --         |
| Mad521  | Selgin O-malonylhexaside                        | Flavone   | 1.14E<br>+05 | 1.13E<br>+05 | 1.08E<br>+05 | 4.05E<br>+05 | 1.74E<br>+05 | 2.15E<br>+05 | 4.78E<br>+04 | 5.77E<br>+04 | 3.72E<br>+04 | 8.99E<br>+03 | 8.97E<br>+04 | 4.45E<br>+04 | 3.02E<br>+04 | 3.18E<br>+04 | 6.08E<br>+04 | --         |
| Mad577  | Chrysin O-hexoside                              | Flavone   | 1.04E<br>+05 | 1.02E<br>+05 | 1.11E<br>+05 | 1.94E<br>+05 | 2.20E<br>+05 | 1.78E<br>+05 | 1.05E<br>+05 | 7.90E<br>+04 | 9.64E<br>+04 | 4.82E<br>+04 | 2.98E<br>+04 | 5.31E<br>+04 | 8.63E<br>+04 | 3.71E<br>+04 | 3.58E<br>+04 | --         |
| Mad632  | Tricin                                          | Flavone   | 9.81E<br>+03 | 1.01E<br>+04 | 1.06E<br>+04 | 1.70E<br>+04 | 4.58E<br>+03 | 2.63E<br>+04 | 4.52E<br>+03 | 4.19E<br>+04 | 6.29E<br>+03 | 3.20E<br>+03 | 7.12E<br>+03 | 4.71E<br>+03 | 9.77E<br>+03 | 9.62E<br>+03 | 5.64E<br>+03 | --         |
| Mad456  | Syringetin 5-O-hexoside                         | Flavone   | 3.83E<br>+04 | 4.38E<br>+04 | 4.82E<br>+04 | 9.00E<br>+00 | 9.00E<br>+00 | 9.00E<br>+00 | 1.64E<br>+04 | 1.26E<br>+04 | 3.21E<br>+04 | 4.38E<br>+04 | 9.26E<br>+04 | 1.35E<br>+04 | 3.10E<br>+05 | 8.69E<br>+04 | 7.55E<br>+04 | --         |
| Mad593  | Chrysin 5-O-glucoside (Toringin)                | Flavone   | 2.99E<br>+04 | 3.33E<br>+04 | 4.28E<br>+04 | 3.30E<br>+04 | 3.64E<br>+04 | 4.86E<br>+04 | 3.87E<br>+04 | 3.50E<br>+04 | 3.84E<br>+04 | 2.69E<br>+04 | 2.59E<br>+04 | 3.55E<br>+04 | 3.23E<br>+04 | 2.45E<br>+04 | 1.83E<br>+04 | --         |
| Mad493  | Syringetin 7-O-hexoside                         | Flavone   | 3.13E<br>+04 | 3.59E<br>+04 | 4.33E<br>+04 | 9.00E<br>+00 | 9.00E<br>+00 | 4.32E<br>+03 | 1.72E<br>+04 | 1.00E<br>+04 | 1.88E<br>+04 | 2.83E<br>+04 | 7.66E<br>+04 | 1.20E<br>+04 | 2.66E<br>+05 | 4.89E<br>+04 | 6.59E<br>+04 | --         |
| Mad517  | Chrysoeriol 7-O-hexoside                        | Flavone   | 1.94E<br>+05 | 1.62E<br>+05 | 1.94E<br>+05 | 3.83E<br>+05 | 4.52E<br>+05 | 3.33E<br>+05 | 9.58E<br>+04 | 7.63E<br>+04 | 1.00E<br>+05 | 6.80E<br>+04 | 7.16E<br>+04 | 8.67E<br>+04 | 1.30E<br>+05 | 7.94E<br>+04 | 6.21E<br>+04 | --         |
| Mad1064 | Acacetin O-acetyl hexoside                      | Flavone   | 6.74E<br>+04 | 6.84E<br>+04 | 8.02E<br>+04 | 4.11E<br>+04 | 4.51E<br>+04 | 4.38E<br>+04 | 2.20E<br>+05 | 1.58E<br>+05 | 1.88E<br>+05 | 1.01E<br>+05 | 1.01E<br>+05 | 7.51E<br>+04 | 7.04E<br>+04 | 9.59E<br>+04 | 8.85E<br>+04 | --         |
| Mad1125 | Apigenin O-hexosyl-O-rutinoside                 | Flavone   | 3.32E<br>+04 | 2.66E<br>+04 | 2.64E<br>+04 | 1.43E<br>+04 | 1.36E<br>+04 | 9.00E<br>+00 | 2.90E<br>+04 | 2.49E<br>+04 | 2.98E<br>+04 | 2.63E<br>+04 | 3.06E<br>+04 | 4.14E<br>+04 | 5.03E<br>+04 | 3.51E<br>+04 | 2.97E<br>+04 | --         |
| Mad1164 | Chrysoeriol O-acetylhexoside                    | Flavone   | 1.07E<br>+06 | 1.46E<br>+06 | 1.64E<br>+06 | 1.19E<br>+06 | 1.35E<br>+06 | 1.29E<br>+06 | 7.91E<br>+05 | 6.52E<br>+05 | 6.44E<br>+05 | 2.05E<br>+05 | 5.94E<br>+05 | 3.30E<br>+05 | 1.22E<br>+05 | 1.21E<br>+05 | 2.33E<br>+06 | --         |
| Mad1173 | Chrysoeriol 7-O-rutinoside                      | Flavone   | 2.37E<br>+04 | 3.07E<br>+04 | 3.35E<br>+04 | 3.07E<br>+04 | 3.71E<br>+04 | 3.45E<br>+04 | 2.62E<br>+04 | 1.82E<br>+04 | 2.84E<br>+04 | 1.50E<br>+04 | 2.63E<br>+04 | 1.61E<br>+04 | 1.34E<br>+04 | 4.64E<br>+04 | 7.94E<br>+04 | --         |

|         |                                               |                          |              |              |              |              |              |              |              |              |              |              |              |              |              |              |              |            |
|---------|-----------------------------------------------|--------------------------|--------------|--------------|--------------|--------------|--------------|--------------|--------------|--------------|--------------|--------------|--------------|--------------|--------------|--------------|--------------|------------|
| Mad1188 | Apigenin 7-O-glucoside<br>(Cosmosiin)         | Flavone                  | 2.59E<br>+05 | 3.34E<br>+05 | 3.19E<br>+05 | 5.96E<br>+05 | 6.36E<br>+05 | 7.88E<br>+05 | 2.66E<br>+05 | 1.95E<br>+05 | 2.09E<br>+05 | 7.89E<br>+04 | 8.42E<br>+04 | 8.55E<br>+04 | 9.00E<br>+00 | 6.70E<br>+04 | 8.88E<br>+04 | C04<br>608 |
| Mad1196 | Chrysoeriol O-glucuronic acid                 | Flavone                  | 1.02E<br>+04 | 1.39E<br>+04 | 1.20E<br>+04 | 9.37E<br>+04 | 9.00E<br>+00 | 9.00E<br>+00 | 9.00E<br>+00 | 9.00E<br>+00 | 4.09E<br>+03 | 4.83E<br>+03 | 9.00E<br>+00 | 3.55E<br>+03 | 5.67E<br>+03 | 9.00E<br>+00 | 9.00E<br>+00 | --         |
| Mad1228 | Luteolin O-eudesmic acid-O-<br>hexoside       | Flavone                  | 1.40E<br>+05 | 1.33E<br>+05 | 1.33E<br>+05 | 1.35E<br>+05 | 1.70E<br>+05 | 1.24E<br>+05 | 3.27E<br>+05 | 2.45E<br>+05 | 1.80E<br>+05 | 9.38E<br>+04 | 3.14E<br>+04 | 4.43E<br>+04 | 7.45E<br>+04 | 5.86E<br>+04 | 5.25E<br>+04 | --         |
| Mad1130 | Tricin O-saccharic acid                       | Flavone                  | 1.41E<br>+04 | 1.88E<br>+04 | 1.50E<br>+04 | 1.33E<br>+04 | 9.56E<br>+03 | 1.46E<br>+04 | 1.28E<br>+04 | 8.35E<br>+03 | 1.10E<br>+04 | 1.42E<br>+04 | 1.57E<br>+04 | 9.00E<br>+00 | 1.15E<br>+05 | 1.35E<br>+04 | 7.41E<br>+03 | --         |
| Mad1168 | Tricin 5-O-hexoside                           | Flavone                  | 3.24E<br>+04 | 3.72E<br>+04 | 3.83E<br>+04 | 9.00E<br>+00 | 9.00E<br>+00 | 9.00E<br>+00 | 4.20E<br>+04 | 2.78E<br>+04 | 9.54E<br>+04 | 7.37E<br>+04 | 1.94E<br>+05 | 3.35E<br>+04 | 2.98E<br>+05 | 1.13E<br>+05 | 1.30E<br>+05 | --         |
| Mad1198 | Tricin 7-O-hexoside                           | Flavone                  | 3.32E<br>+05 | 3.01E<br>+05 | 3.04E<br>+05 | 6.09E<br>+05 | 1.10E<br>+06 | 6.45E<br>+05 | 5.32E<br>+05 | 3.05E<br>+05 | 1.59E<br>+05 | 2.22E<br>+05 | 2.88E<br>+04 | 5.29E<br>+04 | 1.21E<br>+05 | 9.13E<br>+04 | 2.45E<br>+04 | --         |
| Mad1249 | Luteolin                                      | Flavone                  | 2.14E<br>+04 | 1.72E<br>+04 | 1.87E<br>+04 | 6.58E<br>+04 | 8.09E<br>+04 | 6.17E<br>+04 | 9.00E<br>+00 | 9.00E<br>+00 | 9.00E<br>+00 | 9.00E<br>+00 | 9.00E<br>+00 | 9.00E<br>+00 | 9.00E<br>+00 | 9.00E<br>+00 | 9.00E<br>+00 | C01<br>514 |
| Mad1295 | Amentoflavone                                 | Flavone                  | 1.47E<br>+04 | 1.18E<br>+04 | 1.06E<br>+04 | 9.00E<br>+00 | 9.00E<br>+00 | 9.94E<br>+04 | 9.00E<br>+00 | 9.00E<br>+00 | 1.77E<br>+04 | 9.00E<br>+00 | 9.00E<br>+00 | 3.53E<br>+04 | 9.00E<br>+00 | 7.79E<br>+03 | 9.00E<br>+00 | --         |
| Mad688  | Chrysin                                       | Flavone                  | 2.57E<br>+03 | 3.61E<br>+03 | 2.81E<br>+03 | 5.59E<br>+03 | 1.48E<br>+04 | 8.38E<br>+03 | 9.00E<br>+00 | 9.00E<br>+00 | 9.00E<br>+00 | 9.00E<br>+00 | 9.00E<br>+00 | 9.00E<br>+00 | 9.00E<br>+00 | 9.00E<br>+00 | 9.00E<br>+00 | C10<br>028 |
| Mad1166 | Apigenin 7-O-<br>neohesperidoside (Rhoifolin) | Flavone                  | 4.02E<br>+05 | 4.00E<br>+05 | 3.74E<br>+05 | 6.97E<br>+05 | 6.94E<br>+05 | 8.27E<br>+05 | 2.83E<br>+05 | 1.92E<br>+05 | 1.93E<br>+05 | 1.26E<br>+05 | 1.09E<br>+05 | 1.25E<br>+05 | 2.09E<br>+05 | 1.27E<br>+05 | 8.00E<br>+04 | C12<br>627 |
| Mad444  | Apigenin 5-O-glucoside                        | Flavone                  | 3.33E<br>+05 | 4.88E<br>+05 | 2.86E<br>+05 | 1.13E<br>+06 | 1.29E<br>+06 | 1.35E<br>+06 | 2.42E<br>+05 | 1.70E<br>+05 | 1.79E<br>+05 | 4.49E<br>+04 | 8.40E<br>+04 | 9.83E<br>+04 | 1.36E<br>+05 | 9.96E<br>+04 | 9.50E<br>+04 | --         |
| Mad631  | Chrysoeriol                                   | Flavone                  | 4.23E<br>+03 | 4.87E<br>+03 | 3.59E<br>+03 | 1.07E<br>+04 | 7.15E<br>+03 | 9.65E<br>+03 | 9.00E<br>+00 | 9.00E<br>+00 | 9.00E<br>+00 | 9.00E<br>+00 | 9.00E<br>+00 | 9.00E<br>+00 | 9.00E<br>+00 | 9.00E<br>+00 | 9.00E<br>+00 | C04<br>293 |
| Mad458  | Apigenin 7-rutinoside<br>(Isorhoifolin)       | Flavone                  | 2.09E<br>+06 | 2.08E<br>+06 | 2.09E<br>+06 | 3.25E<br>+06 | 4.05E<br>+06 | 4.27E<br>+06 | 1.42E<br>+06 | 1.23E<br>+06 | 1.18E<br>+06 | 9.25E<br>+05 | 6.29E<br>+05 | 8.60E<br>+05 | 1.32E<br>+06 | 8.29E<br>+05 | 4.94E<br>+05 | --         |
| Mad693  | Nobiletin                                     | Flavone                  | 3.89E<br>+04 | 3.95E<br>+04 | 4.59E<br>+04 | 3.35E<br>+04 | 3.30E<br>+04 | 3.65E<br>+04 | 5.47E<br>+04 | 4.63E<br>+04 | 3.66E<br>+04 | 6.82E<br>+04 | 3.97E<br>+04 | 6.40E<br>+04 | 3.89E<br>+04 | 3.89E<br>+04 | 3.72E<br>+04 | --         |
| Mad709  | Tangeretin                                    | Flavone                  | 5.41E<br>+04 | 5.87E<br>+04 | 6.68E<br>+04 | 6.19E<br>+04 | 6.06E<br>+04 | 6.07E<br>+04 | 7.11E<br>+04 | 6.46E<br>+04 | 6.40E<br>+04 | 7.21E<br>+04 | 6.41E<br>+04 | 7.08E<br>+04 | 6.04E<br>+04 | 5.79E<br>+04 | 5.12E<br>+04 | --         |
| Mad1136 | Luteolin 7-O-glucoside<br>(Cynaroside)        | Flavone                  | 9.35E<br>+05 | 9.75E<br>+05 | 9.02E<br>+05 | 2.70E<br>+06 | 2.51E<br>+06 | 2.91E<br>+06 | 3.77E<br>+05 | 2.71E<br>+05 | 3.95E<br>+05 | 2.60E<br>+05 | 3.03E<br>+05 | 2.96E<br>+05 | 3.43E<br>+05 | 2.23E<br>+05 | 2.38E<br>+05 | --         |
| Mad626  | Butin                                         | Flavone                  | 1.99E<br>+05 | 2.21E<br>+05 | 2.07E<br>+05 | 5.96E<br>+05 | 9.25E<br>+05 | 6.15E<br>+05 | 9.00E<br>+00 | 9.00E<br>+00 | 9.00E<br>+00 | 9.00E<br>+00 | 9.00E<br>+00 | 9.00E<br>+00 | 9.00E<br>+00 | 9.00E<br>+00 | 9.00E<br>+00 | C09<br>614 |
| Mad454  | O-methylnaringenin C-<br>pentoside            | Flavone C-<br>glycosides | 1.25E<br>+05 | 1.81E<br>+05 | 2.10E<br>+05 | 2.47E<br>+05 | 1.84E<br>+05 | 2.27E<br>+05 | 1.26E<br>+05 | 1.53E<br>+05 | 9.20E<br>+04 | 9.03E<br>+04 | 6.17E<br>+04 | 5.57E<br>+04 | 1.07E<br>+05 | 8.81E<br>+04 | 7.22E<br>+04 | --         |
| Mad359  | di-C,C-hexosyl-luteolin                       | Flavone C-<br>glycosides | 8.71E<br>+03 | 9.20E<br>+03 | 9.67E<br>+03 | 2.89E<br>+04 | 8.27E<br>+03 | 9.00E<br>+00 | 9.00E<br>+00 | 2.22E<br>+03 | 9.00E<br>+03 | 6.66E<br>+03 | 9.00E<br>+00 | 2.72E<br>+03 | 1.57E<br>+04 | 1.22E<br>+04 | 3.07E<br>+03 | --         |
| Mad391  | Luteolin 6-C-glucoside                        | Flavone C-<br>glycosides | 2.17E<br>+04 | 1.93E<br>+04 | 2.30E<br>+04 | 1.08E<br>+04 | 1.51E<br>+04 | 3.52E<br>+04 | 6.11E<br>+03 | 6.35E<br>+03 | 1.35E<br>+03 | 1.71E<br>+03 | 3.84E<br>+03 | 1.80E<br>+03 | 2.20E<br>+04 | 8.62E<br>+03 | 2.00E<br>+04 | --         |
| Mad278  | 8-C-hexosyl-hesperetin O-<br>hexoside         | Flavone C-<br>glycosides | 4.05E<br>+04 | 4.25E<br>+04 | 4.20E<br>+04 | 5.00E<br>+04 | 6.61E<br>+04 | 5.68E<br>+04 | 1.70E<br>+04 | 1.82E<br>+04 | 1.30E<br>+04 | 9.70E<br>+03 | 2.46E<br>+04 | 1.10E<br>+04 | 6.23E<br>+03 | 5.87E<br>+04 | 6.23E<br>+04 | --         |
| Mad298  | C-hexosyl-luteolin O-hexoside                 | Flavone C-<br>glycosides | 6.79E<br>+03 | 7.93E<br>+03 | 6.21E<br>+03 | 2.95E<br>+04 | 9.00E<br>+00 | 9.00E<br>+00 | 9.00E<br>+00 | 9.00E<br>+00 | 9.00E<br>+00 | 9.00E<br>+00 | 9.00E<br>+00 | 9.00E<br>+00 | 1.16E<br>+04 | 1.09E<br>+04 | 9.00E<br>+00 | --         |
| Mad370  | 6-C-hexosyl-hesperetin O-<br>hexoside         | Flavone C-<br>glycosides | 7.51E<br>+04 | 7.36E<br>+04 | 4.44E<br>+04 | 1.18E<br>+04 | 9.51E<br>+03 | 5.82E<br>+03 | 1.45E<br>+05 | 7.71E<br>+04 | 5.99E<br>+04 | 1.30E<br>+05 | 1.45E<br>+05 | 1.05E<br>+05 | 1.02E<br>+05 | 2.38E<br>+05 | 1.34E<br>+05 | --         |
| Mad424  | Luteolin 8-C-hexosyl-O-<br>hexoside           | Flavone C-<br>glycosides | 2.39E<br>+04 | 2.29E<br>+04 | 2.09E<br>+04 | 2.09E<br>+04 | 9.00E<br>+00 | 1.44E<br>+04 | 5.62E<br>+04 | 4.04E<br>+04 | 6.24E<br>+04 | 6.23E<br>+04 | 4.63E<br>+04 | 2.03E<br>+04 | 7.03E<br>+04 | 5.07E<br>+04 | 2.88E<br>+04 | --         |
| Mad1156 | Chrysoeriol 8-C-pentosyl-O-<br>rutinoside     | Flavone C-<br>glycosides | 1.29E<br>+04 | 2.16E<br>+04 | 1.91E<br>+04 | 7.46E<br>+03 | 6.14E<br>+03 | 6.14E<br>+03 | 2.49E<br>+04 | 1.83E<br>+04 | 1.63E<br>+04 | 1.98E<br>+04 | 1.79E<br>+04 | 3.26E<br>+04 | 3.97E<br>+04 | 2.43E<br>+04 | 9.00E<br>+00 | --         |











|         |                          |                                 |              |              |              |              |              |              |              |              |              |              |              |              |              |              |              |            |
|---------|--------------------------|---------------------------------|--------------|--------------|--------------|--------------|--------------|--------------|--------------|--------------|--------------|--------------|--------------|--------------|--------------|--------------|--------------|------------|
| Mad1347 | 9,10-EODE                | Lipids_Fatty acids              | 2.61E<br>+05 | 2.22E<br>+05 | 2.18E<br>+05 | 3.86E<br>+05 | 5.38E<br>+05 | 2.89E<br>+05 | 6.02E<br>+04 | 6.14E<br>+04 | 6.40E<br>+04 | 9.99E<br>+04 | 9.93E<br>+04 | 8.53E<br>+04 | 3.27E<br>+05 | 3.87E<br>+05 | 3.44E<br>+05 | --         |
| Mad1342 | 9-HOTrE                  | Lipids_Fatty acids              | 1.43E<br>+05 | 1.29E<br>+05 | 1.25E<br>+05 | 2.96E<br>+05 | 4.47E<br>+05 | 2.45E<br>+05 | 8.39E<br>+04 | 5.56E<br>+04 | 4.55E<br>+04 | 6.64E<br>+04 | 5.81E<br>+04 | 2.33E<br>+04 | 1.17E<br>+05 | 9.89E<br>+04 | 6.06E<br>+04 | --         |
| Mad1349 | 9-KODE                   | Lipids_Fatty acids              | 9.46E<br>+03 | 8.53E<br>+03 | 8.27E<br>+03 | 1.11E<br>+04 | 1.16E<br>+04 | 7.18E<br>+03 | 9.00E<br>+00 | 9.00E<br>+00 | 9.00E<br>+00 | 6.38E<br>+03 | 6.37E<br>+03 | 9.00E<br>+00 | 1.87E<br>+04 | 1.60E<br>+04 | 9.97E<br>+03 | C14<br>766 |
| Mad1339 | 13-HpOTrE(r)             | Lipids_Fatty acids              | 4.00E<br>+03 | 3.39E<br>+03 | 4.66E<br>+03 | 4.80E<br>+03 | 4.49E<br>+03 | 1.68E<br>+03 | 9.00E<br>+00 | 9.00E<br>+00 | 9.00E<br>+00 | 2.35E<br>+03 | 3.48E<br>+03 | 2.72E<br>+03 | 6.26E<br>+03 | 1.08E<br>+04 | 7.54E<br>+03 | --         |
| Mad1333 | 9-HpOTrE                 | Lipids_Fatty acids              | 1.01E<br>+04 | 8.92E<br>+03 | 9.63E<br>+03 | 1.44E<br>+04 | 1.85E<br>+04 | 1.25E<br>+04 | 4.05E<br>+03 | 6.66E<br>+03 | 5.41E<br>+03 | 5.64E<br>+03 | 5.05E<br>+03 | 5.60E<br>+03 | 6.79E<br>+03 | 1.07E<br>+04 | 8.35E<br>+03 | --         |
| Mad1336 | 13-HOTrE(r)              | Lipids_Fatty acids              | 3.91E<br>+04 | 4.04E<br>+04 | 3.46E<br>+04 | 3.63E<br>+04 | 3.74E<br>+04 | 4.25E<br>+04 | 3.36E<br>+04 | 3.47E<br>+04 | 3.34E<br>+04 | 3.93E<br>+04 | 3.10E<br>+04 | 3.66E<br>+04 | 3.59E<br>+04 | 3.09E<br>+04 | 3.04E<br>+04 | --         |
| Mad1352 | 12,13-EODE               | Lipids_Fatty acids              | 3.50E<br>+03 | 3.85E<br>+03 | 3.26E<br>+03 | 5.21E<br>+03 | 5.42E<br>+03 | 3.39E<br>+03 | 9.00E<br>+00 | 9.00E<br>+00 | 9.00E<br>+00 | 1.99E<br>+03 | 1.23E<br>+03 | 9.00E<br>+00 | 6.77E<br>+03 | 8.22E<br>+03 | 7.01E<br>+03 | --         |
| Mad1338 | 13-HPODE                 | Lipids_Fatty acids              | 9.93E<br>+03 | 1.04E<br>+04 | 9.98E<br>+03 | 1.42E<br>+04 | 2.71E<br>+04 | 1.36E<br>+04 | 3.06E<br>+03 | 2.71E<br>+03 | 2.44E<br>+03 | 3.16E<br>+03 | 3.66E<br>+03 | 3.07E<br>+03 | 1.04E<br>+04 | 1.38E<br>+04 | 1.12E<br>+04 | C04<br>717 |
| Mad1357 | $\alpha$ -Linolenic acid | Lipids_Fatty acids              | 2.80E<br>+03 | 2.82E<br>+03 | 2.54E<br>+03 | 8.62E<br>+03 | 9.80E<br>+03 | 4.86E<br>+03 | 9.00E<br>+00 | 9.00E<br>+00 | 9.00E<br>+00 | 9.00E<br>+00 | 9.00E<br>+00 | 9.00E<br>+00 | 9.00E<br>+00 | 9.00E<br>+00 | 9.00E<br>+00 | C06<br>427 |
| Mad710  | DGMG (18:2) isomer2      | Lipids_Glycerolip<br>ids        | 1.32E<br>+04 | 1.04E<br>+04 | 1.22E<br>+04 | 2.28E<br>+04 | 2.97E<br>+04 | 1.87E<br>+04 | 9.31E<br>+03 | 8.22E<br>+03 | 7.80E<br>+03 | 4.05E<br>+03 | 5.76E<br>+03 | 3.66E<br>+03 | 5.62E<br>+03 | 3.59E<br>+03 | 2.89E<br>+03 | --         |
| Mad711  | MAG (18:3) isomer5       | Lipids_Glycerolip<br>ids        | 4.64E<br>+05 | 4.20E<br>+05 | 4.02E<br>+05 | 1.07E<br>+06 | 1.44E<br>+06 | 9.94E<br>+05 | 4.40E<br>+05 | 3.32E<br>+05 | 2.99E<br>+05 | 1.63E<br>+05 | 2.09E<br>+05 | 1.36E<br>+05 | 2.22E<br>+05 | 1.84E<br>+05 | 1.18E<br>+05 | --         |
| Mad723  | DGMG (18:2) isomer1      | Lipids_Glycerolip<br>ids        | 6.62E<br>+04 | 5.80E<br>+04 | 6.84E<br>+04 | 3.90E<br>+04 | 4.48E<br>+04 | 3.37E<br>+04 | 9.77E<br>+04 | 1.22E<br>+05 | 1.04E<br>+05 | 6.59E<br>+04 | 5.96E<br>+04 | 4.19E<br>+04 | 7.86E<br>+04 | 6.35E<br>+04 | 5.40E<br>+04 | --         |
| Mad728  | DGMG (18:2) isomer3      | Lipids_Glycerolip<br>ids        | 5.96E<br>+04 | 6.46E<br>+04 | 5.48E<br>+04 | 3.38E<br>+04 | 5.39E<br>+04 | 2.64E<br>+04 | 9.29E<br>+04 | 9.71E<br>+04 | 9.49E<br>+04 | 5.27E<br>+04 | 6.20E<br>+04 | 3.76E<br>+04 | 9.09E<br>+04 | 6.33E<br>+04 | 6.18E<br>+04 | --         |
| Mad699  | MAG (18:4) isomer2       | Lipids_Glycerolip<br>ids        | 6.72E<br>+04 | 6.39E<br>+04 | 7.78E<br>+04 | 4.55E<br>+04 | 6.05E<br>+04 | 9.21E<br>+04 | 7.03E<br>+04 | 4.35E<br>+04 | 4.60E<br>+04 | 4.51E<br>+04 | 7.12E<br>+04 | 2.48E<br>+04 | 1.79E<br>+05 | 1.30E<br>+05 | 6.86E<br>+04 | --         |
| Mad750  | MAG (18:1) isomer2       | Lipids_Glycerolip<br>ids        | 2.85E<br>+04 | 2.53E<br>+04 | 2.88E<br>+04 | 1.70E<br>+04 | 2.15E<br>+04 | 1.09E<br>+04 | 4.66E<br>+04 | 5.44E<br>+04 | 5.37E<br>+04 | 3.03E<br>+04 | 2.68E<br>+04 | 1.60E<br>+04 | 2.19E<br>+04 | 2.01E<br>+04 | 1.48E<br>+04 | --         |
| Mad771  | MAG (18:2)               | Lipids_Glycerolip<br>ids        | 4.59E<br>+05 | 3.82E<br>+05 | 4.04E<br>+05 | 4.14E<br>+05 | 4.02E<br>+05 | 2.50E<br>+05 | 6.90E<br>+04 | 9.88E<br>+04 | 7.99E<br>+04 | 1.98E<br>+05 | 2.70E<br>+05 | 1.59E<br>+05 | 8.37E<br>+05 | 1.17E<br>+06 | 9.95E<br>+05 | --         |
| Mad738  | MAG (18:3) isomer3       | Lipids_Glycerolip<br>ids        | 3.83E<br>+04 | 2.53E<br>+04 | 2.84E<br>+04 | 1.26E<br>+05 | 1.34E<br>+05 | 1.01E<br>+05 | 3.13E<br>+04 | 1.93E<br>+04 | 1.83E<br>+04 | 1.17E<br>+04 | 1.44E<br>+04 | 5.80E<br>+03 | 1.84E<br>+04 | 1.08E<br>+04 | 4.64E<br>+03 | --         |
| Mad766  | MAG (18:3) isomer4       | Lipids_Glycerolip<br>ids        | 1.73E<br>+04 | 1.28E<br>+04 | 1.51E<br>+04 | 3.17E<br>+04 | 3.62E<br>+04 | 1.77E<br>+04 | 6.37E<br>+03 | 7.02E<br>+03 | 6.83E<br>+03 | 1.04E<br>+04 | 7.97E<br>+03 | 6.60E<br>+03 | 1.83E<br>+04 | 1.45E<br>+04 | 1.69E<br>+04 | --         |
| Mad712  | DGMG (18:1)              | Lipids_Glycerolip<br>ids        | 3.64E<br>+04 | 4.81E<br>+04 | 5.79E<br>+04 | 1.24E<br>+05 | 1.35E<br>+05 | 9.43E<br>+04 | 3.94E<br>+04 | 3.44E<br>+04 | 3.63E<br>+04 | 1.87E<br>+04 | 2.39E<br>+04 | 1.67E<br>+04 | 2.72E<br>+04 | 1.81E<br>+04 | 1.54E<br>+04 | --         |
| Mad730  | MAG (18:3) isomer2       | Lipids_Glycerolip<br>ids        | 1.40E<br>+04 | 1.21E<br>+04 | 1.95E<br>+04 | 3.37E<br>+04 | 4.88E<br>+04 | 3.10E<br>+04 | 1.18E<br>+04 | 8.58E<br>+03 | 9.35E<br>+03 | 5.51E<br>+03 | 7.84E<br>+03 | 7.99E<br>+03 | 1.94E<br>+04 | 2.10E<br>+04 | 1.40E<br>+04 | --         |
| Mad743  | MAG (18:1) isomer1       | Lipids_Glycerolip<br>ids        | 2.82E<br>+04 | 2.75E<br>+04 | 3.06E<br>+04 | 1.94E<br>+04 | 2.01E<br>+04 | 1.51E<br>+04 | 5.24E<br>+04 | 6.03E<br>+04 | 5.25E<br>+04 | 3.39E<br>+04 | 3.14E<br>+04 | 1.84E<br>+04 | 2.55E<br>+04 | 2.48E<br>+04 | 1.89E<br>+04 | --         |
| Mad768  | MAG (18:3) isomer1       | Lipids_Glycerolip<br>ids        | 6.97E<br>+05 | 6.14E<br>+05 | 6.45E<br>+05 | 1.99E<br>+06 | 2.18E<br>+06 | 1.06E<br>+06 | 1.57E<br>+05 | 1.78E<br>+05 | 2.25E<br>+05 | 2.75E<br>+05 | 1.80E<br>+05 | 1.50E<br>+05 | 5.04E<br>+05 | 2.60E<br>+05 | 4.96E<br>+05 | --         |
| Mad737  | LysoPC 16:1              | Lipids_Glyceroph<br>ospholipids | 2.39E<br>+04 | 2.31E<br>+04 | 2.32E<br>+04 | 2.64E<br>+04 | 2.53E<br>+04 | 2.83E<br>+04 | 1.58E<br>+04 | 1.86E<br>+04 | 1.69E<br>+04 | 1.86E<br>+04 | 2.69E<br>+04 | 2.56E<br>+04 | 5.39E<br>+04 | 3.56E<br>+04 | 2.10E<br>+04 | --         |
| Mad722  | LysoPC 16:1 (2n isomer)  | Lipids_Glyceroph<br>ospholipids | 1.18E<br>+05 | 1.15E<br>+05 | 1.20E<br>+05 | 1.08E<br>+05 | 1.55E<br>+05 | 1.24E<br>+05 | 5.29E<br>+04 | 6.19E<br>+04 | 6.27E<br>+04 | 1.05E<br>+05 | 1.50E<br>+05 | 1.25E<br>+05 | 2.87E<br>+05 | 1.78E<br>+05 | 1.99E<br>+05 | --         |
| Mad735  | LysoPC 18:2              | Lipids_Glyceroph<br>ospholipids | 6.49E<br>+05 | 5.84E<br>+05 | 6.38E<br>+05 | 1.38E<br>+06 | 1.57E<br>+06 | 1.24E<br>+06 | 3.04E<br>+05 | 3.42E<br>+05 | 3.20E<br>+05 | 3.32E<br>+05 | 4.87E<br>+05 | 4.79E<br>+05 | 8.09E<br>+05 | 7.10E<br>+05 | 5.17E<br>+05 | --         |

|         |                         |                             |          |          |          |          |          |          |          |          |          |          |          |          |          |          |          |    |
|---------|-------------------------|-----------------------------|----------|----------|----------|----------|----------|----------|----------|----------|----------|----------|----------|----------|----------|----------|----------|----|
| Mad745  | LysoPC 18:3             | Lipids_Glycerophospholipids | 5.26E+05 | 5.05E+05 | 5.60E+05 | 9.55E+05 | 1.46E+06 | 8.74E+05 | 1.95E+05 | 2.30E+05 | 2.79E+05 | 2.61E+05 | 3.32E+05 | 5.81E+05 | 1.40E+06 | 1.28E+06 | 9.16E+05 | -- |
| Mad746  | LysoPC 16:0             | Lipids_Glycerophospholipids | 2.99E+06 | 2.87E+06 | 3.03E+06 | 6.10E+06 | 8.83E+06 | 5.90E+06 | 1.33E+07 | 1.41E+07 | 1.56E+07 | 1.47E+07 | 1.85E+07 | 3.41E+07 | 6.75E+07 | 6.89E+07 | 5.15E+07 | -- |
| Mad747  | LysoPE 18:1 (2n isomer) | Lipids_Glycerophospholipids | 4.68E+05 | 4.48E+05 | 4.56E+05 | 1.11E+06 | 1.10E+06 | 1.03E+06 | 5.27E+05 | 3.81E+05 | 5.31E+05 | 1.66E+05 | 1.19E+05 | 9.16E+04 | 2.76E+05 | 2.18E+05 | 1.59E+05 | -- |
| Mad749  | LysoPC 18:1 (2n isomer) | Lipids_Glycerophospholipids | 6.92E+06 | 7.18E+06 | 7.17E+06 | 1.42E+07 | 1.64E+07 | 1.56E+07 | 8.22E+06 | 5.74E+06 | 5.90E+06 | 3.63E+06 | 2.57E+06 | 2.71E+06 | 5.96E+06 | 5.75E+06 | 3.81E+06 | -- |
| Mad704  | LysoPC 16:2 (2n isomer) | Lipids_Glycerophospholipids | 3.42E+04 | 3.41E+04 | 3.67E+04 | 2.68E+04 | 3.03E+04 | 2.32E+04 | 9.18E+03 | 9.37E+03 | 9.07E+03 | 2.92E+04 | 4.13E+04 | 3.86E+04 | 1.02E+05 | 8.56E+04 | 9.19E+04 | -- |
| Mad715  | LysoPE 14:0             | Lipids_Glycerophospholipids | 4.97E+03 | 5.34E+03 | 3.64E+03 | 7.70E+03 | 8.98E+03 | 7.20E+03 | 9.00E+00 | 1.91E+03 | 9.00E+03 | 2.63E+03 | 2.57E+03 | 3.89E+03 | 1.01E+04 | 1.18E+04 | 8.77E+03 | -- |
| Mad717  | LysoPC 18:3 (2n isomer) | Lipids_Glycerophospholipids | 2.01E+07 | 1.99E+07 | 2.02E+07 | 2.52E+07 | 2.67E+07 | 2.46E+07 | 1.89E+07 | 1.62E+07 | 1.66E+07 | 1.56E+07 | 1.55E+07 | 1.29E+07 | 2.07E+07 | 1.67E+07 | 1.56E+07 | -- |
| Mad719  | LysoPC 14:0             | Lipids_Glycerophospholipids | 2.36E+04 | 2.49E+04 | 2.68E+04 | 4.24E+04 | 5.21E+04 | 3.63E+04 | 7.78E+03 | 7.22E+03 | 9.62E+03 | 1.43E+04 | 1.29E+04 | 2.06E+04 | 5.84E+04 | 7.32E+04 | 4.60E+04 | -- |
| Mad725  | LysoPC 18:2 (2n isomer) | Lipids_Glycerophospholipids | 7.03E+06 | 7.65E+06 | 7.64E+06 | 1.05E+07 | 1.21E+07 | 1.06E+07 | 5.29E+06 | 5.47E+06 | 5.43E+06 | 5.60E+06 | 5.48E+06 | 4.87E+06 | 1.20E+07 | 9.05E+06 | 8.89E+06 | -- |
| Mad731  | LysoPE 18:2 (2n isomer) | Lipids_Glycerophospholipids | 3.31E+05 | 3.58E+05 | 3.84E+05 | 5.70E+05 | 6.84E+05 | 5.66E+05 | 1.69E+05 | 2.01E+05 | 2.05E+05 | 2.40E+05 | 3.15E+05 | 3.59E+05 | 6.16E+05 | 5.43E+05 | 3.21E+05 | -- |
| Mad757  | LysoPC 18:1             | Lipids_Glycerophospholipids | 6.72E+04 | 6.18E+04 | 5.42E+04 | 1.01E+05 | 1.06E+05 | 8.35E+04 | 4.47E+04 | 3.56E+04 | 3.87E+04 | 3.13E+04 | 4.63E+04 | 3.95E+04 | 7.32E+04 | 6.81E+04 | 4.36E+04 | -- |
| Mad765  | LysoPE 18:0             | Lipids_Glycerophospholipids | 6.57E+03 | 6.07E+03 | 7.14E+03 | 2.13E+04 | 4.08E+04 | 2.08E+04 | 6.24E+03 | 5.86E+03 | 4.68E+03 | 6.88E+03 | 8.20E+03 | 1.29E+04 | 2.46E+04 | 3.35E+04 | 2.51E+04 | -- |
| Mad718  | LysoPC 15:1             | Lipids_Glycerophospholipids | 8.43E+03 | 6.12E+03 | 9.67E+03 | 1.28E+04 | 1.48E+04 | 1.31E+04 | 4.20E+03 | 3.45E+03 | 9.00E+02 | 5.89E+03 | 6.50E+03 | 8.22E+03 | 8.49E+03 | 6.87E+03 | 6.07E+03 | -- |
| Mad727  | LysoPC 15:0             | Lipids_Glycerophospholipids | 3.23E+04 | 3.10E+04 | 3.58E+04 | 5.71E+04 | 7.25E+04 | 4.95E+04 | 1.08E+04 | 1.71E+04 | 1.42E+04 | 2.32E+04 | 2.61E+04 | 5.24E+04 | 7.03E+04 | 5.96E+04 | 4.92E+04 | -- |
| Mad755  | LysoPC 18:0 (2n isomer) | Lipids_Glycerophospholipids | 6.49E+04 | 7.53E+04 | 6.43E+04 | 1.55E+05 | 1.65E+05 | 1.59E+05 | 7.60E+04 | 5.30E+04 | 6.07E+04 | 3.29E+04 | 2.29E+04 | 2.46E+04 | 6.08E+04 | 5.02E+04 | 3.28E+04 | -- |
| Mad761  | LysoPC 17:0             | Lipids_Glycerophospholipids | 4.81E+04 | 3.74E+04 | 3.84E+04 | 3.98E+04 | 5.88E+04 | 3.46E+04 | 9.12E+03 | 1.03E+04 | 9.76E+03 | 2.73E+04 | 2.40E+04 | 5.91E+04 | 1.66E+05 | 2.52E+05 | 1.89E+05 | -- |
| Mad1344 | LysoPE 16:0             | Lipids_Glycerophospholipids | 1.20E+06 | 1.16E+06 | 1.17E+06 | 2.22E+06 | 2.80E+06 | 2.24E+06 | 5.83E+05 | 6.46E+05 | 5.88E+05 | 8.51E+05 | 1.04E+06 | 1.71E+06 | 2.36E+06 | 2.59E+06 | 2.15E+06 | -- |
| Mad1348 | LysoPE 18:1             | Lipids_Glycerophospholipids | 2.08E+05 | 1.96E+05 | 1.91E+05 | 2.79E+05 | 3.00E+05 | 2.63E+05 | 1.09E+05 | 1.08E+05 | 1.05E+05 | 1.52E+05 | 2.15E+05 | 2.10E+05 | 4.27E+05 | 3.24E+05 | 2.22E+05 | -- |
| Mad754  | LysoPC 20:4             | Lipids_Glycerophospholipids | 5.16E+05 | 5.15E+05 | 5.92E+05 | 1.14E+06 | 1.33E+06 | 1.12E+06 | 5.82E+05 | 4.22E+05 | 5.09E+05 | 2.80E+05 | 1.82E+05 | 2.08E+05 | 4.81E+05 | 4.51E+05 | 2.90E+05 | -- |
| Mad713  | LysoPC 14:0 (2n isomer) | Lipids_Glycerophospholipids | 4.90E+04 | 4.89E+04 | 5.31E+04 | 8.54E+04 | 1.10E+05 | 7.21E+04 | 1.38E+04 | 1.27E+04 | 2.01E+04 | 2.84E+04 | 2.35E+04 | 3.89E+04 | 1.04E+05 | 1.41E+05 | 8.96E+04 | -- |
| Mad741  | LysoPC 16:0 (2n isomer) | Lipids_Glycerophospholipids | 3.19E+06 | 3.14E+06 | 3.27E+06 | 6.59E+06 | 9.83E+06 | 6.36E+06 | 1.37E+06 | 1.47E+06 | 1.60E+06 | 1.58E+06 | 1.85E+06 | 3.32E+06 | 7.10E+06 | 7.10E+06 | 5.70E+06 | -- |
| Mad764  | LysoPC 18:0             | Lipids_Glycerophospholipids | 3.38E+05 | 4.25E+05 | 3.40E+05 | 1.05E+06 | 2.07E+06 | 9.78E+05 | 2.34E+05 | 1.95E+05 | 1.74E+05 | 2.30E+05 | 2.24E+05 | 4.73E+05 | 1.27E+06 | 1.47E+06 | 1.22E+06 | -- |
| Mad767  | LysoPC 20:1 (2n isomer) | Lipids_Glycerophospholipids | 2.26E+04 | 2.87E+04 | 2.58E+04 | 6.29E+04 | 8.86E+04 | 6.55E+04 | 4.20E+04 | 3.16E+04 | 2.61E+04 | 1.95E+04 | 1.80E+04 | 1.54E+04 | 2.45E+04 | 1.96E+04 | 1.69E+04 | -- |
| Mad769  | LysoPC 20:1             | Lipids_Glycerophospholipids | 7.04E+04 | 7.41E+04 | 7.10E+04 | 3.51E+05 | 5.11E+05 | 3.80E+05 | 1.18E+05 | 7.26E+04 | 5.75E+04 | 2.83E+04 | 3.09E+04 | 2.38E+04 | 3.43E+04 | 2.93E+04 | 1.95E+04 | -- |
| Mad1332 | LysoPE 14:0 (2n isomer) | Lipids_Glycerophospholipids | 6.41E+03 | 5.94E+03 | 6.17E+03 | 1.19E+04 | 1.82E+04 | 8.99E+03 | 3.19E+03 | 4.73E+03 | 5.11E+03 | 2.86E+03 | 5.45E+03 | 9.48E+03 | 8.83E+03 | 1.03E+04 | 6.59E+03 | -- |

|         |                                  |                              |          |          |          |          |          |          |          |          |          |          |          |          |          |          |          |     |
|---------|----------------------------------|------------------------------|----------|----------|----------|----------|----------|----------|----------|----------|----------|----------|----------|----------|----------|----------|----------|-----|
| Mad1343 | LysoPE 16:0 (2n isomer)          | Lipids_Glycerophospholipids  | 1.94E+06 | 1.81E+06 | 1.82E+06 | 3.63E+06 | 4.65E+06 | 3.48E+06 | 9.14E+05 | 9.96E+05 | 9.00E+05 | 1.27E+06 | 1.60E+06 | 2.57E+06 | 3.60E+06 | 3.99E+06 | 3.11E+06 | --  |
| Mad189  | Nicotinic acid-hexoside          | Nicotinic acid derivatives   | 4.80E+05 | 6.20E+05 | 5.91E+05 | 1.25E+06 | 1.26E+06 | 1.12E+06 | 4.21E+05 | 2.91E+05 | 3.15E+05 | 1.20E+05 | 2.49E+05 | 1.16E+05 | 4.07E+05 | 2.56E+05 | 2.84E+05 | --  |
| Mad69   | Nicotinate ribonucleoside        | Nicotinic acid derivatives   | 5.69E+05 | 6.81E+05 | 6.54E+05 | 1.68E+06 | 1.84E+06 | 1.48E+06 | 5.61E+05 | 5.23E+05 | 5.40E+05 | 2.96E+05 | 3.30E+05 | 2.94E+05 | 3.82E+05 | 3.45E+05 | 4.34E+05 | C05 |
| Mad108  | Nicotinic acid                   | Nicotinic acid derivatives   | 1.02E+05 | 1.04E+05 | 1.03E+05 | 1.09E+05 | 1.14E+05 | 1.36E+05 | 2.34E+05 | 2.27E+05 | 2.38E+05 | 1.35E+04 | 3.04E+04 | 9.00E+00 | 9.00E+00 | 1.69E+04 | 9.00E+00 | C00 |
| Mad97   | Xanthine                         | Nucleotide and its derivates | 1.86E+04 | 2.57E+04 | 2.83E+04 | 8.34E+04 | 8.93E+04 | 8.54E+04 | 5.12E+03 | 5.20E+03 | 9.00E+00 | 9.00E+00 | 3.07E+03 | 3.57E+03 | 9.00E+00 | 9.00E+00 | 9.00E+00 | C00 |
| Mad90   | Adenosine 3'-monophosphate       | Nucleotide and its derivates | 3.03E+06 | 2.54E+06 | 2.74E+06 | 2.96E+06 | 3.06E+06 | 3.07E+06 | 2.90E+06 | 2.25E+06 | 2.81E+06 | 2.23E+06 | 1.95E+06 | 2.20E+06 | 4.73E+06 | 3.20E+06 | 3.29E+06 | C01 |
| Mad103  | Adenosine 5'-monophosphate       | Nucleotide and its derivates | 1.29E+06 | 1.08E+06 | 1.09E+06 | 1.14E+06 | 1.28E+06 | 1.03E+06 | 1.04E+06 | 9.95E+05 | 1.21E+06 | 9.98E+05 | 5.98E+05 | 1.21E+06 | 2.47E+06 | 1.41E+06 | 1.65E+06 | C00 |
| Mad963  | Cyclic AMP                       | Nucleotide and its derivates | 9.06E+04 | 8.10E+04 | 8.72E+04 | 2.17E+05 | 2.10E+05 | 1.99E+05 | 6.93E+04 | 4.82E+04 | 4.57E+04 | 2.41E+04 | 2.64E+04 | 2.39E+04 | 3.18E+04 | 2.80E+04 | 3.77E+04 | C00 |
| Mad873  | Uridine 5'-diphospho-D-glucose   | Nucleotide and its derivates | 1.56E+06 | 1.80E+06 | 1.74E+06 | 1.46E+06 | 1.54E+06 | 1.98E+06 | 1.52E+06 | 1.20E+06 | 1.81E+06 | 1.26E+06 | 1.49E+06 | 1.14E+06 | 2.69E+06 | 2.48E+06 | 2.48E+06 | C00 |
| Mad874  | Guanosine 5'-monophosphate       | Nucleotide and its derivates | 5.22E+04 | 6.38E+04 | 4.01E+04 | 5.31E+04 | 7.43E+04 | 6.07E+04 | 3.97E+04 | 3.84E+04 | 5.63E+04 | 2.58E+04 | 2.40E+04 | 2.78E+04 | 7.94E+04 | 5.20E+04 | 5.50E+04 | C00 |
| Mad28   | 2'-Deoxyinosine-5'-monophosphate | Nucleotide and its derivates | 5.40E+06 | 5.74E+06 | 5.47E+06 | 1.44E+07 | 1.77E+07 | 2.05E+07 | 1.18E+07 | 9.82E+06 | 6.99E+06 | 1.21E+07 | 9.15E+06 | 7.24E+06 | 8.74E+06 | 1.61E+07 | 1.16E+07 | C06 |
| Mad195  | 6-Methylmercaptapurine           | Nucleotide and its derivates | 6.91E+06 | 6.58E+06 | 7.15E+06 | 5.53E+06 | 5.87E+06 | 6.77E+06 | 1.46E+07 | 1.22E+07 | 1.51E+07 | 1.06E+07 | 9.71E+06 | 1.16E+07 | 1.21E+07 | 9.62E+06 | 7.50E+06 | C16 |
| Mad199  | Adenosine O-ribose               | Nucleotide and its derivates | 1.25E+05 | 1.19E+05 | 1.18E+05 | 2.57E+05 | 2.62E+05 | 2.15E+05 | 1.25E+05 | 6.62E+04 | 8.21E+04 | 1.03E+05 | 6.98E+04 | 4.38E+04 | 1.94E+05 | 7.75E+04 | 8.97E+04 | --  |
| Mad208  | Succinyladenosine                | Nucleotide and its derivates | 4.14E+05 | 2.95E+05 | 4.50E+05 | 8.89E+05 | 9.59E+05 | 7.96E+05 | 3.39E+05 | 2.95E+05 | 3.03E+05 | 1.47E+05 | 1.12E+05 | 1.80E+05 | 4.70E+05 | 2.21E+05 | 1.81E+05 | --  |
| Mad157  | Uridine                          | Nucleotide and its derivates | 5.38E+06 | 6.71E+06 | 6.33E+06 | 1.26E+07 | 1.40E+07 | 1.21E+07 | 4.37E+06 | 2.57E+06 | 3.29E+06 | 1.18E+06 | 1.15E+06 | 1.05E+06 | 1.96E+06 | 1.36E+06 | 1.21E+06 | C00 |
| Mad29   | Cytosine                         | Nucleotide and its derivates | 6.10E+05 | 4.86E+05 | 6.16E+05 | 1.45E+06 | 1.27E+06 | 1.41E+06 | 7.92E+05 | 3.78E+05 | 4.75E+05 | 2.53E+05 | 3.85E+05 | 2.95E+05 | 3.79E+05 | 3.32E+05 | 4.63E+05 | C00 |
| Mad120  | Adenine                          | Nucleotide and its derivates | 3.19E+05 | 2.76E+05 | 3.42E+05 | 8.57E+05 | 7.54E+05 | 6.23E+05 | 1.45E+05 | 1.72E+05 | 2.14E+05 | 5.19E+04 | 6.38E+04 | 5.72E+04 | 8.36E+04 | 5.13E+04 | 5.68E+04 | C00 |
| Mad67   | β-Nicotinamide mononucleotide    | Nucleotide and its derivates | 1.85E+06 | 2.08E+06 | 2.26E+06 | 1.21E+06 | 1.67E+06 | 1.48E+06 | 3.63E+06 | 2.25E+06 | 2.26E+06 | 1.49E+06 | 1.56E+06 | 1.46E+06 | 2.98E+06 | 3.11E+06 | 2.69E+06 | C00 |
| Mad50   | 2-Hydroxy-6-aminopurine          | Nucleotide and its derivates | 8.97E+04 | 9.21E+04 | 1.11E+05 | 1.31E+05 | 1.08E+05 | 2.44E+05 | 1.44E+05 | 1.05E+05 | 1.28E+05 | 4.46E+04 | 7.30E+04 | 5.65E+04 | 4.89E+04 | 7.67E+04 | 7.37E+04 | --  |
| Mad188  | Adenosine                        | Nucleotide and its derivates | 3.61E+07 | 3.91E+07 | 3.96E+07 | 2.30E+07 | 2.57E+07 | 2.52E+07 | 3.36E+07 | 3.02E+07 | 3.27E+07 | 2.57E+07 | 2.99E+07 | 2.73E+07 | 3.31E+07 | 3.00E+07 | 3.04E+07 | C00 |
| Mad107  | Uracil                           | Nucleotide and its derivates | 5.73E+05 | 4.88E+05 | 5.75E+05 | 1.38E+06 | 1.68E+06 | 1.44E+06 | 3.37E+05 | 2.15E+05 | 3.00E+05 | 8.90E+04 | 1.06E+05 | 1.15E+05 | 2.23E+05 | 1.35E+05 | 1.15E+05 | C00 |
| Mad109  | Guanine                          | Nucleotide and its derivates | 1.01E+05 | 9.49E+04 | 1.10E+05 | 2.51E+05 | 2.70E+05 | 3.76E+05 | 4.08E+04 | 3.27E+04 | 3.56E+04 | 1.64E+04 | 1.97E+04 | 1.42E+04 | 2.87E+04 | 2.06E+04 | 1.51E+04 | C00 |
| Mad71   | Inosine                          | Nucleotide and its derivates | 4.43E+05 | 4.45E+05 | 4.77E+05 | 6.60E+05 | 8.69E+05 | 7.09E+05 | 1.97E+05 | 1.20E+05 | 1.07E+05 | 3.55E+04 | 2.93E+04 | 8.07E+04 | 7.38E+04 | 2.35E+04 | 3.43E+04 | C00 |
| Mad941  | Guanosine                        | Nucleotide and its derivates | 1.87E+06 | 1.82E+06 | 1.73E+06 | 3.77E+06 | 3.77E+06 | 3.80E+06 | 1.10E+06 | 8.14E+05 | 8.25E+05 | 4.62E+05 | 5.90E+05 | 4.65E+05 | 7.67E+05 | 6.18E+05 | 6.23E+05 | C00 |
| Mad180  | Deoxyguanosine                   | Nucleotide and its derivates | 2.28E+04 | 2.92E+04 | 2.32E+04 | 7.17E+04 | 5.78E+04 | 5.36E+04 | 1.55E+04 | 1.06E+04 | 9.00E+00 | 9.00E+00 | 9.00E+00 | 9.00E+00 | 2.99E+04 | 1.48E+04 | 9.00E+00 | C00 |

|         |                                            |                                |          |          |          |          |          |          |          |          |          |          |          |          |          |          |          |     |
|---------|--------------------------------------------|--------------------------------|----------|----------|----------|----------|----------|----------|----------|----------|----------|----------|----------|----------|----------|----------|----------|-----|
| Mad101  | Deoxycytidine                              | Nucleotide and its derivatives | 1.25E+04 | 2.83E+04 | 2.48E+04 | 6.28E+04 | 5.87E+04 | 4.62E+04 | 9.00E+00 | 1.39E+04 | 9.00E+00 | 9.00E+00 | 9.00E+00 | 8.19E+03 | 1.33E+04 | 9.00E+00 | 9.00E+00 | C00 |
| Mad960  | Xanthosine                                 | Nucleotide and its derivatives | 4.72E+04 | 4.61E+04 | 4.03E+04 | 1.01E+05 | 1.32E+05 | 1.17E+05 | 2.31E+04 | 2.14E+04 | 2.05E+04 | 1.02E+04 | 1.57E+04 | 3.04E+00 | 1.71E+04 | 1.56E+04 | 1.56E+04 | C01 |
| Mad866  | Nicotinic acid adenine dinucleotide        | Nucleotide and its derivatives | 4.63E+04 | 4.67E+04 | 4.80E+04 | 3.64E+04 | 3.30E+04 | 3.78E+04 | 3.49E+04 | 4.31E+04 | 3.60E+04 | 3.07E+04 | 4.16E+04 | 2.67E+04 | 8.70E+04 | 5.07E+04 | 4.69E+04 | C00 |
| Mad889  | 2'-Deoxycytidine-5'-monophosphate          | Nucleotide and its derivatives | 5.25E+04 | 4.37E+04 | 4.29E+04 | 3.83E+04 | 3.98E+04 | 3.17E+04 | 2.08E+04 | 3.90E+04 | 4.75E+04 | 4.85E+04 | 4.38E+04 | 1.85E+04 | 5.63E+04 | 3.37E+04 | 3.38E+04 | C00 |
| Mad1049 | 5'-Deoxy-5'-(methylthio)adenosine          | Nucleotide and its derivatives | 4.96E+04 | 4.80E+04 | 4.55E+04 | 5.95E+04 | 6.52E+04 | 4.00E+04 | 3.88E+04 | 5.13E+04 | 5.15E+04 | 4.39E+04 | 5.18E+04 | 4.84E+04 | 4.14E+04 | 4.18E+04 | 4.11E+04 | C00 |
| Mad878  | Inosine 5'-monophosphate                   | Nucleotide and its derivatives | 1.18E+04 | 9.41E+03 | 1.20E+04 | 9.00E+00 | 1.34E+04 | 1.08E+04 | 9.72E+03 | 7.51E+03 | 7.69E+03 | 7.49E+03 | 6.52E+03 | 6.58E+03 | 1.83E+04 | 9.00E+00 | 1.40E+04 | C00 |
| Mad110  | Guanosine monophosphate                    | Nucleotide and its derivatives | 8.10E+03 | 6.68E+03 | 6.33E+03 | 8.35E+03 | 1.11E+04 | 1.05E+04 | 7.78E+03 | 9.00E+03 | 7.73E+03 | 4.07E+03 | 4.28E+03 | 6.28E+03 | 1.43E+03 | 8.78E+03 | 3.87E+03 | C00 |
| Mad1046 | Flavin adenine dinucleotide (FAD)          | Nucleotide and its derivatives | 1.15E+05 | 9.95E+04 | 1.15E+05 | 1.17E+05 | 1.09E+05 | 9.19E+04 | 8.54E+04 | 9.08E+04 | 1.00E+05 | 1.20E+05 | 1.40E+05 | 1.10E+05 | 2.29E+05 | 1.58E+05 | 1.70E+05 | C00 |
| Mad178  | 2'-Deoxyinosine                            | Nucleotide and its derivatives | 2.31E+04 | 3.10E+04 | 2.27E+04 | 6.35E+04 | 8.04E+04 | 6.89E+04 | 1.19E+04 | 7.19E+04 | 1.11E+04 | 9.00E+04 | 9.00E+04 | 9.00E+04 | 9.00E+04 | 9.00E+04 | 9.00E+04 | C05 |
| Mad830  | Uridine 5'-diphosphate                     | Nucleotide and its derivatives | 1.50E+05 | 1.69E+05 | 2.03E+05 | 9.24E+04 | 7.22E+04 | 8.23E+04 | 1.55E+05 | 1.71E+05 | 2.04E+05 | 1.60E+05 | 1.21E+05 | 1.55E+05 | 3.42E+05 | 2.79E+05 | 2.60E+05 | C00 |
| Mad45   | 1-Methyladenine                            | Nucleotide and its derivatives | 6.73E+04 | 4.33E+04 | 6.35E+04 | 2.14E+04 | 1.85E+04 | 8.95E+03 | 7.38E+04 | 1.12E+04 | 1.36E+04 | 4.68E+04 | 7.36E+04 | 4.21E+04 | 2.58E+04 | 5.23E+04 | 5.06E+04 | --  |
| Mad85   | Cytidine 5'-monophosphate (Cytidylic acid) | Nucleotide and its derivatives | 9.06E+04 | 9.81E+04 | 8.81E+04 | 6.64E+04 | 7.07E+04 | 7.46E+04 | 1.02E+05 | 7.19E+04 | 7.16E+04 | 6.75E+04 | 7.48E+04 | 7.78E+04 | 1.01E+05 | 1.13E+05 | 1.12E+05 | C00 |
| Mad143  | 2'-Deoxyadenosine-5'-monophosphate         | Nucleotide and its derivatives | 1.64E+05 | 9.54E+04 | 1.35E+05 | 1.96E+05 | 2.29E+05 | 1.57E+05 | 1.06E+05 | 8.13E+04 | 7.29E+04 | 1.72E+05 | 1.20E+05 | 1.18E+05 | 2.50E+05 | 2.25E+05 | 1.54E+05 | C00 |
| Mad133  | Uridine 5'-monophosphate                   | Nucleotide and its derivatives | 6.93E+04 | 5.81E+04 | 7.07E+04 | 5.27E+04 | 6.65E+04 | 3.81E+04 | 7.61E+04 | 5.24E+04 | 7.50E+04 | 3.91E+04 | 5.49E+04 | 5.66E+04 | 1.22E+05 | 9.48E+04 | 7.41E+04 | C00 |
| Mad27   | 1-methylguanidine                          | Nucleotide and its derivatives | 2.81E+04 | 3.15E+04 | 3.92E+04 | 5.94E+04 | 5.87E+04 | 5.76E+04 | 2.78E+04 | 4.04E+04 | 3.20E+04 | 1.88E+04 | 1.67E+04 | 1.77E+04 | 2.83E+04 | 2.86E+04 | 2.36E+04 | --  |
| Mad993  | N6-Succinyl Adenosine                      | Nucleotide and its derivatives | 1.42E+05 | 1.16E+05 | 1.29E+05 | 2.58E+05 | 2.44E+05 | 2.10E+05 | 1.03E+05 | 9.29E+04 | 9.57E+04 | 8.11E+04 | 4.61E+04 | 6.55E+04 | 1.57E+05 | 7.01E+04 | 7.32E+04 | --  |
| Mad73   | Cytidine                                   | Nucleotide and its derivatives | 2.67E+06 | 3.25E+06 | 3.03E+06 | 7.09E+06 | 5.86E+06 | 6.42E+06 | 3.81E+06 | 2.08E+06 | 2.18E+06 | 1.09E+06 | 1.90E+06 | 1.37E+06 | 1.65E+06 | 1.49E+06 | 2.19E+06 | C00 |
| Mad198  | Deoxyadenosine                             | Nucleotide and its derivatives | 2.73E+05 | 3.12E+05 | 3.14E+05 | 8.36E+05 | 8.97E+05 | 7.02E+05 | 1.36E+06 | 8.86E+05 | 9.66E+05 | 4.11E+05 | 4.58E+05 | 2.01E+05 | 7.22E+05 | 4.58E+05 | 4.39E+05 | C00 |
| Mad219  | 2-(dimethylamino)guanosine                 | Nucleotide and its derivatives | 7.13E+04 | 9.59E+04 | 9.81E+04 | 2.58E+05 | 3.53E+05 | 2.65E+05 | 3.70E+04 | 2.73E+04 | 3.21E+04 | 1.72E+04 | 9.15E+03 | 8.61E+03 | 2.16E+04 | 1.89E+04 | 1.70E+04 | --  |
| Mad891  | β-Pseudouridine                            | Nucleotide and its derivatives | 1.08E+05 | 8.71E+04 | 7.72E+04 | 1.98E+05 | 2.22E+05 | 2.12E+05 | 6.11E+04 | 4.80E+04 | 3.59E+04 | 1.95E+04 | 1.69E+04 | 1.54E+04 | 2.67E+04 | 2.41E+04 | 2.17E+04 | C02 |
| Mad92   | Phosphoric acid                            | Organic acids                  | 1.96E+06 | 2.03E+06 | 2.14E+06 | 3.17E+06 | 2.97E+06 | 3.56E+06 | 1.60E+06 | 1.27E+06 | 1.84E+06 | 1.07E+06 | 1.47E+06 | 1.07E+06 | 2.51E+06 | 1.97E+06 | 2.64E+06 | C00 |
| Mad788  | 4-Hydroxy-3-methoxymandelate               | Organic acids                  | 1.32E+04 | 1.08E+04 | 1.84E+04 | 9.00E+00 | 4.94E+03 | 9.00E+00 | 1.23E+04 | 1.58E+04 | 1.70E+04 | 1.72E+04 | 1.43E+04 | 7.01E+03 | 4.73E+03 | 3.86E+03 | 3.10E+03 | C05 |
| Mad861  | Citramalate                                | Organic acids                  | 1.27E+07 | 1.23E+07 | 1.22E+07 | 9.76E+06 | 1.03E+07 | 1.21E+07 | 2.23E+06 | 2.15E+06 | 2.14E+06 | 1.29E+06 | 9.44E+05 | 6.65E+05 | 1.84E+05 | 2.89E+05 | 2.61E+05 | --  |
| Mad965  | Kynurenic acid O-hexside                   | Organic acids                  | 9.05E+05 | 8.76E+05 | 9.20E+05 | 2.73E+05 | 3.24E+05 | 3.47E+05 | 1.07E+06 | 6.40E+05 | 7.55E+05 | 1.03E+06 | 9.66E+05 | 8.60E+05 | 2.53E+05 | 1.38E+05 | 1.59E+05 | --  |
| Mad957  | Diethyl phosphate                          | Organic acids                  | 4.69E+05 | 4.34E+05 | 4.71E+05 | 3.10E+05 | 3.29E+05 | 3.46E+05 | 5.39E+05 | 5.58E+05 | 4.87E+05 | 5.10E+05 | 4.42E+05 | 6.71E+05 | 7.21E+05 | 3.25E+05 | 8.81E+05 | C06 |

|         |                                                        |               |              |              |              |              |              |              |              |              |              |              |              |              |              |              |              |            |
|---------|--------------------------------------------------------|---------------|--------------|--------------|--------------|--------------|--------------|--------------|--------------|--------------|--------------|--------------|--------------|--------------|--------------|--------------|--------------|------------|
| Mad1048 | 2-Isopropylmalate                                      | Organic acids | 1.78E<br>+05 | 1.77E<br>+05 | 1.75E<br>+05 | 1.67E<br>+05 | 1.70E<br>+05 | 1.61E<br>+05 | 8.71E<br>+04 | 1.25E<br>+05 | 1.41E<br>+05 | 1.66E<br>+05 | 2.07E<br>+05 | 1.75E<br>+05 | 3.15E<br>+05 | 3.99E<br>+05 | 4.47E<br>+05 | C02<br>504 |
| Mad794  | 2-Aminoethanesulfonic acid                             | Organic acids | 3.88E<br>+03 | 4.67E<br>+03 | 3.55E<br>+03 | 3.25E<br>+03 | 4.68E<br>+03 | 9.00E<br>+00 | 7.78E<br>+03 | 5.51E<br>+03 | 5.00E<br>+03 | 1.07E<br>+04 | 1.02E<br>+04 | 2.91E<br>+03 | 1.82E<br>+04 | 2.29E<br>+04 | 1.68E<br>+04 | C00<br>245 |
| Mad935  | 3-Hydroxybutyrate                                      | Organic acids | 5.31E<br>+04 | 4.59E<br>+04 | 4.14E<br>+04 | 3.63E<br>+04 | 4.73E<br>+04 | 5.29E<br>+04 | 5.60E<br>+04 | 5.22E<br>+04 | 4.74E<br>+04 | 6.58E<br>+04 | 4.61E<br>+04 | 5.10E<br>+04 | 7.97E<br>+04 | 6.28E<br>+04 | 5.82E<br>+04 | --         |
| Mad1040 | Kynurenic acid                                         | Organic acids | 7.41E<br>+04 | 7.51E<br>+04 | 7.44E<br>+04 | 1.52E<br>+05 | 1.14E<br>+05 | 9.49E<br>+04 | 8.49E<br>+04 | 1.31E<br>+05 | 7.28E<br>+04 | 2.70E<br>+04 | 4.14E<br>+04 | 3.19E<br>+04 | 2.44E<br>+04 | 2.36E<br>+04 | 2.79E<br>+04 | C01<br>717 |
| Mad567  | Ethyl 3,4-Dihydroxybenzoate<br>(Ethyl protocatechuate) | Organic acids | 9.30E<br>+04 | 8.52E<br>+04 | 8.51E<br>+04 | 9.00E<br>+00 | 9.00E<br>+00 | 9.00E<br>+00 | 8.65E<br>+04 | 1.23E<br>+05 | 1.45E<br>+05 | 8.58E<br>+04 | 1.55E<br>+05 | 1.24E<br>+05 | 1.05E<br>+05 | 7.67E<br>+04 | 8.37E<br>+04 | --         |
| Mad969  | Glutaric acid                                          | Organic acids | 1.59E<br>+06 | 1.16E<br>+06 | 1.18E<br>+06 | 1.70E<br>+06 | 1.44E<br>+06 | 1.34E<br>+06 | 9.00E<br>+00 | 9.00E<br>+00 | 1.14E<br>+06 | 9.98E<br>+05 | 9.39E<br>+05 | 7.46E<br>+05 | 1.85E<br>+06 | 1.94E<br>+06 | 2.17E<br>+06 | C00<br>489 |
| Mad1023 | Adipic acid                                            | Organic acids | 6.34E<br>+04 | 4.48E<br>+04 | 3.90E<br>+04 | 3.65E<br>+04 | 6.06E<br>+04 | 4.98E<br>+04 | 2.71E<br>+04 | 2.59E<br>+04 | 1.01E<br>+04 | 1.16E<br>+05 | 5.12E<br>+04 | 1.26E<br>+05 | 5.40E<br>+04 | 3.40E<br>+04 | 3.86E<br>+04 | --         |
| Mad531  | Azelaic acid                                           | Organic acids | 2.72E<br>+04 | 3.28E<br>+04 | 3.44E<br>+04 | 1.42E<br>+04 | 2.18E<br>+04 | 2.25E<br>+04 | 2.34E<br>+04 | 2.93E<br>+04 | 2.88E<br>+04 | 6.81E<br>+04 | 3.81E<br>+04 | 4.98E<br>+04 | 4.37E<br>+04 | 3.73E<br>+04 | 3.14E<br>+04 | --         |
| Mad1207 | Azelaic Acid                                           | Organic acids | 7.33E<br>+05 | 6.74E<br>+05 | 6.87E<br>+05 | 4.41E<br>+05 | 5.79E<br>+05 | 5.16E<br>+05 | 6.04E<br>+05 | 5.98E<br>+05 | 6.15E<br>+05 | 1.67E<br>+06 | 9.72E<br>+05 | 1.15E<br>+06 | 8.88E<br>+05 | 1.00E<br>+06 | 8.40E<br>+05 | --         |
| Mad991  | 2-Methylsuccinic acid                                  | Organic acids | 1.98E<br>+06 | 1.87E<br>+06 | 1.79E<br>+06 | 1.96E<br>+06 | 2.05E<br>+06 | 2.14E<br>+06 | 1.22E<br>+06 | 1.40E<br>+06 | 1.36E<br>+06 | 1.26E<br>+06 | 1.30E<br>+06 | 1.15E<br>+06 | 2.63E<br>+06 | 2.83E<br>+06 | 3.20E<br>+06 | --         |
| Mad1304 | Dodecanedioic acid                                     | Organic acids | 4.83E<br>+03 | 3.01E<br>+03 | 3.55E<br>+03 | 3.70E<br>+03 | 4.75E<br>+03 | 4.00E<br>+03 | 4.20E<br>+03 | 4.06E<br>+03 | 3.85E<br>+03 | 4.09E<br>+03 | 3.55E<br>+03 | 4.45E<br>+03 | 4.18E<br>+03 | 3.74E<br>+03 | 4.06E<br>+03 | --         |
| Mad93   | 6-Aminocaproic acid                                    | Organic acids | 7.04E<br>+06 | 5.74E<br>+06 | 6.33E<br>+06 | 4.96E<br>+06 | 5.20E<br>+06 | 4.08E<br>+06 | 9.20E<br>+05 | 2.03E<br>+06 | 2.55E<br>+06 | 5.50E<br>+06 | 4.08E<br>+06 | 4.15E<br>+06 | 9.19E<br>+06 | 1.45E<br>+07 | 1.41E<br>+07 | C02<br>378 |
| Mad1062 | Terephthalic acid                                      | Organic acids | 1.45E<br>+06 | 1.28E<br>+06 | 1.19E<br>+06 | 9.30E<br>+05 | 7.98E<br>+05 | 9.11E<br>+05 | 1.46E<br>+06 | 1.73E<br>+06 | 1.34E<br>+06 | 1.97E<br>+06 | 1.69E<br>+06 | 2.27E<br>+06 | 2.99E<br>+06 | 1.66E<br>+06 | 1.91E<br>+06 | C06<br>337 |
| Mad1066 | Phthalic acid                                          | Organic acids | 1.21E<br>+05 | 1.18E<br>+05 | 1.17E<br>+05 | 7.63E<br>+04 | 8.07E<br>+04 | 8.51E<br>+04 | 1.18E<br>+05 | 1.04E<br>+05 | 1.01E<br>+05 | 1.33E<br>+05 | 1.34E<br>+05 | 1.31E<br>+05 | 2.83E<br>+05 | 1.64E<br>+05 | 1.57E<br>+05 | C01<br>606 |
| Mad84   | 4-Guanidinobutyric acid                                | Organic acids | 1.20E<br>+05 | 1.37E<br>+05 | 1.62E<br>+05 | 1.87E<br>+05 | 1.56E<br>+05 | 1.87E<br>+05 | 8.80E<br>+04 | 1.57E<br>+05 | 2.63E<br>+05 | 1.10E<br>+05 | 1.13E<br>+05 | 1.11E<br>+05 | 3.04E<br>+05 | 1.74E<br>+05 | 1.20E<br>+05 | C01<br>035 |
| Mad863  | Shikimic acid                                          | Organic acids | 9.16E<br>+05 | 9.62E<br>+05 | 8.59E<br>+05 | 2.48E<br>+06 | 2.43E<br>+06 | 2.22E<br>+06 | 9.44E<br>+05 | 5.63E<br>+05 | 5.31E<br>+05 | 1.75E<br>+05 | 1.91E<br>+05 | 2.56E<br>+05 | 5.78E<br>+05 | 2.20E<br>+05 | 2.72E<br>+05 | C00<br>493 |
| Mad947  | Methylmalonic acid                                     | Organic acids | 1.61E<br>+07 | 1.49E<br>+07 | 1.50E<br>+07 | 3.18E<br>+07 | 3.23E<br>+07 | 3.09E<br>+07 | 9.38E<br>+06 | 1.12E<br>+07 | 1.06E<br>+07 | 4.53E<br>+06 | 7.15E<br>+06 | 2.91E<br>+06 | 3.38E<br>+06 | 2.05E<br>+06 | 2.13E<br>+06 | C02<br>170 |
| Mad125  | 2-Picolinic acid                                       | Organic acids | 4.78E<br>+04 | 2.91E<br>+04 | 3.44E<br>+04 | 3.33E<br>+04 | 2.58E<br>+04 | 1.82E<br>+04 | 4.37E<br>+04 | 5.01E<br>+04 | 6.04E<br>+04 | 5.67E<br>+04 | 3.76E<br>+04 | 3.97E<br>+04 | 7.02E<br>+04 | 6.24E<br>+04 | 7.75E<br>+04 | C10<br>164 |
| Mad218  | D-Pantothenic acid                                     | Organic acids | 4.92E<br>+03 | 6.39E<br>+03 | 2.31E<br>+03 | 1.04E<br>+04 | 1.29E<br>+04 | 1.33E<br>+04 | 5.51E<br>+03 | 3.92E<br>+03 | 6.10E<br>+03 | 2.42E<br>+00 | 9.00E<br>+03 | 2.54E<br>+03 | 7.37E<br>+03 | 3.31E<br>+03 | 3.58E<br>+03 | --         |
| Mad988  | 3-Hydroxy-3-methyl butyric<br>acid                     | Organic acids | 6.53E<br>+04 | 7.03E<br>+04 | 7.10E<br>+04 | 7.18E<br>+04 | 3.12E<br>+04 | 4.86E<br>+04 | 6.88E<br>+04 | 9.37E<br>+04 | 9.90E<br>+04 | 1.57E<br>+04 | 2.06E<br>+04 | 9.00E<br>+00 | 7.21E<br>+04 | 2.73E<br>+04 | 3.90E<br>+04 | --         |
| Mad928  | Succinic acid                                          | Organic acids | 1.52E<br>+07 | 1.55E<br>+07 | 1.53E<br>+07 | 3.16E<br>+07 | 3.27E<br>+07 | 3.28E<br>+07 | 1.01E<br>+07 | 1.18E<br>+07 | 1.02E<br>+07 | 4.45E<br>+06 | 6.90E<br>+06 | 2.80E<br>+06 | 3.12E<br>+06 | 2.03E<br>+06 | 2.13E<br>+06 | C00<br>042 |
| Mad25   | Creatinine                                             | Organic acids | 1.62E<br>+04 | 1.36E<br>+04 | 1.08E<br>+04 | 1.31E<br>+04 | 1.48E<br>+04 | 1.74E<br>+04 | 1.71E<br>+04 | 9.94E<br>+03 | 1.40E<br>+04 | 8.70E<br>+03 | 1.84E<br>+04 | 1.33E<br>+04 | 1.71E<br>+04 | 1.23E<br>+04 | 1.89E<br>+04 | C00<br>791 |
| Mad1139 | Suberic acid                                           | Organic acids | 2.71E<br>+04 | 1.64E<br>+04 | 2.19E<br>+04 | 1.92E<br>+04 | 2.39E<br>+04 | 1.69E<br>+04 | 1.87E<br>+04 | 2.86E<br>+04 | 2.23E<br>+04 | 4.41E<br>+04 | 2.67E<br>+04 | 5.21E<br>+04 | 3.64E<br>+04 | 1.69E<br>+04 | 2.35E<br>+04 | --         |
| Mad909  | L-(+)-Tartaric acid                                    | Organic acids | 2.93E<br>+05 | 2.72E<br>+05 | 2.64E<br>+05 | 2.06E<br>+05 | 2.45E<br>+05 | 2.84E<br>+05 | 3.52E<br>+04 | 5.18E<br>+04 | 3.83E<br>+04 | 3.05E<br>+05 | 2.19E<br>+05 | 1.35E<br>+05 | 4.44E<br>+05 | 5.18E<br>+05 | 5.13E<br>+05 | --         |
| Mad842  | Citric acid                                            | Organic acids | 8.14E<br>+07 | 7.37E<br>+07 | 8.45E<br>+07 | 8.03E<br>+07 | 8.06E<br>+07 | 8.10E<br>+07 | 7.99E<br>+07 | 8.61E<br>+07 | 8.98E<br>+07 | 8.70E<br>+07 | 8.72E<br>+07 | 9.88E<br>+07 | 9.17E<br>+07 | 8.30E<br>+07 | 8.65E<br>+07 | C00<br>158 |



|         |                                               |               |              |              |              |              |              |              |              |              |              |              |              |              |              |              |              |            |
|---------|-----------------------------------------------|---------------|--------------|--------------|--------------|--------------|--------------|--------------|--------------|--------------|--------------|--------------|--------------|--------------|--------------|--------------|--------------|------------|
| Mad919  | Fumaric acid                                  | Organic acids | 4.62E<br>+05 | 3.64E<br>+05 | 3.79E<br>+05 | 1.52E<br>+06 | 1.08E<br>+06 | 2.33E<br>+06 | 9.00E<br>+00 | 9.00E<br>+00 | 9.00E<br>+00 | 9.00E<br>+00 | 9.00E<br>+00 | 9.00E<br>+00 | 9.00E<br>+00 | 9.00E<br>+00 | 9.00E<br>+00 | C00<br>122 |
| Mad903  | A-Ketoglutaric acid                           | Organic acids | 1.14E<br>+06 | 1.03E<br>+06 | 9.47E<br>+05 | 2.36E<br>+06 | 3.41E<br>+06 | 2.52E<br>+06 | 4.47E<br>+05 | 4.02E<br>+05 | 3.68E<br>+05 | 1.84E<br>+05 | 3.13E<br>+05 | 1.45E<br>+05 | 2.77E<br>+05 | 1.63E<br>+05 | 1.36E<br>+05 | --         |
| Mad1068 | 4-Hydroxybenzoic acid                         | Organic acids | 2.10E<br>+05 | 1.72E<br>+05 | 1.55E<br>+05 | 4.41E<br>+05 | 2.91E<br>+05 | 3.44E<br>+05 | 1.88E<br>+05 | 1.53E<br>+05 | 9.00E<br>+00 | 1.19E<br>+05 | 9.00E<br>+00 | 9.00E<br>+00 | 9.00E<br>+00 | 2.43E<br>+05 | 2.00E<br>+05 | C00<br>156 |
| Mad9    | trans-Citridic acid                           | Organic acids | 3.34E<br>+05 | 3.51E<br>+05 | 3.92E<br>+05 | 4.42E<br>+05 | 4.07E<br>+05 | 4.04E<br>+05 | 1.96E<br>+05 | 2.68E<br>+05 | 4.08E<br>+05 | 4.44E<br>+05 | 6.42E<br>+05 | 6.40E<br>+05 | 2.31E<br>+05 | 2.01E<br>+05 | 2.91E<br>+05 | --         |
| Mad23   | $\gamma$ -aminobutyric acid                   | Organic acids | 3.92E<br>+05 | 3.16E<br>+05 | 3.76E<br>+05 | 1.27E<br>+06 | 1.47E<br>+06 | 1.31E<br>+06 | 3.09E<br>+05 | 3.18E<br>+05 | 3.15E<br>+05 | 1.26E<br>+05 | 2.01E<br>+05 | 1.26E<br>+05 | 1.95E<br>+05 | 3.06E<br>+05 | 2.14E<br>+05 | C00<br>334 |
| Mad987  | ethylmalonate                                 | Organic acids | 2.30E<br>+04 | 1.59E<br>+04 | 1.13E<br>+04 | 2.05E<br>+04 | 1.21E<br>+04 | 1.64E<br>+04 | 1.18E<br>+04 | 1.58E<br>+04 | 1.34E<br>+04 | 9.15E<br>+03 | 9.00E<br>+00 | 1.38E<br>+04 | 1.87E<br>+04 | 1.81E<br>+04 | 3.14E<br>+04 | --         |
| Mad770  | Taurocholic acid                              | Organic acids | 4.34E<br>+04 | 4.19E<br>+04 | 3.92E<br>+04 | 4.11E<br>+04 | 3.85E<br>+04 | 4.17E<br>+04 | 4.29E<br>+04 | 3.94E<br>+04 | 3.96E<br>+04 | 4.09E<br>+04 | 4.29E<br>+04 | 4.19E<br>+04 | 3.64E<br>+04 | 3.73E<br>+04 | 4.22E<br>+04 | C05<br>122 |
| Mad1146 | 2-(Formylamino)benzoic acid                   | Organic acids | 1.22E<br>+05 | 1.30E<br>+05 | 1.18E<br>+05 | 3.13E<br>+05 | 3.07E<br>+05 | 3.75E<br>+05 | 9.00E<br>+00 | 9.00E<br>+00 | 9.00E<br>+00 | 9.00E<br>+00 | 9.00E<br>+00 | 9.00E<br>+00 | 9.00E<br>+00 | 9.00E<br>+00 | 9.00E<br>+00 | --         |
| Mad906  | Aminomalonic acid                             | Organic acids | 5.21E<br>+05 | 5.49E<br>+05 | 5.32E<br>+05 | 1.33E<br>+06 | 1.35E<br>+06 | 1.30E<br>+06 | 3.48E<br>+05 | 3.95E<br>+05 | 3.42E<br>+05 | 1.55E<br>+05 | 2.48E<br>+05 | 8.70E<br>+04 | 1.02E<br>+05 | 6.57E<br>+04 | 6.79E<br>+04 | --         |
| Mad930  | (Rs)-Mevalonic acid                           | Organic acids | 3.39E<br>+06 | 3.56E<br>+06 | 3.58E<br>+06 | 7.07E<br>+06 | 6.58E<br>+06 | 7.43E<br>+06 | 3.29E<br>+06 | 3.45E<br>+06 | 3.48E<br>+06 | 2.53E<br>+06 | 2.18E<br>+06 | 1.81E<br>+06 | 1.49E<br>+06 | 1.14E<br>+06 | 1.03E<br>+06 | --         |
| Mad778  | trans,trans-Muconic acid                      | Organic acids | 4.60E<br>+05 | 5.25E<br>+05 | 4.75E<br>+05 | 9.00E<br>+00 | 9.00E<br>+00 | 9.00E<br>+00 | 3.99E<br>+05 | 4.06E<br>+05 | 4.55E<br>+05 | 1.25E<br>+06 | 9.25E<br>+05 | 7.81E<br>+05 | 2.48E<br>+05 | 3.63E<br>+05 | 6.08E<br>+05 | --         |
| pme2033 | L(-)-Malic acid                               | Organic acids | 1.96E<br>+07 | 1.77E<br>+07 | 1.78E<br>+07 | 2.25E<br>+07 | 2.19E<br>+07 | 2.26E<br>+07 | 1.99E<br>+07 | 2.19E<br>+07 | 2.14E<br>+07 | 1.81E<br>+07 | 1.72E<br>+07 | 1.73E<br>+07 | 1.29E<br>+07 | 1.34E<br>+07 | 1.34E<br>+07 | C00<br>497 |
| Mad3    | Histidinol                                    | Others        | 3.37E<br>+07 | 2.74E<br>+07 | 3.32E<br>+07 | 3.61E<br>+07 | 3.50E<br>+07 | 3.74E<br>+07 | 3.53E<br>+07 | 3.26E<br>+07 | 3.05E<br>+07 | 2.90E<br>+07 | 2.37E<br>+07 | 2.59E<br>+07 | 3.24E<br>+07 | 3.08E<br>+07 | 3.11E<br>+07 | C00<br>860 |
| Mad1225 | E-3,4,5'-Trihydroxy-3'-glucopyranosylstilbene | Others        | 3.48E<br>+04 | 3.08E<br>+04 | 2.79E<br>+04 | 6.87E<br>+04 | 1.52E<br>+05 | 8.21E<br>+04 | 5.19E<br>+03 | 9.00E<br>+00 | 9.00E<br>+00 | 8.14E<br>+03 | 9.00E<br>+00 | 9.00E<br>+00 | 9.00E<br>+00 | 9.00E<br>+00 | 9.00E<br>+00 | --         |
| Mad204  | DIMBOA glucoside                              | Others        | 4.05E<br>+05 | 4.09E<br>+05 | 5.21E<br>+05 | 5.19E<br>+05 | 3.99E<br>+05 | 4.77E<br>+05 | 3.64E<br>+05 | 7.90E<br>+05 | 6.12E<br>+05 | 4.56E<br>+05 | 3.02E<br>+05 | 4.94E<br>+05 | 3.62E<br>+05 | 1.94E<br>+05 | 2.73E<br>+05 | C04<br>831 |
| Mad212  | Benzamide                                     | Others        | 3.27E<br>+04 | 2.70E<br>+04 | 3.14E<br>+04 | 2.78E<br>+04 | 2.09E<br>+04 | 2.11E<br>+04 | 5.15E<br>+04 | 3.55E<br>+04 | 3.72E<br>+04 | 2.12E<br>+04 | 2.77E<br>+04 | 2.93E<br>+04 | 3.84E<br>+04 | 2.93E<br>+04 | 2.09E<br>+04 | C09<br>815 |
| Mad714  | Cholesterol                                   | Others        | 9.60E<br>+04 | 8.88E<br>+04 | 1.07E<br>+05 | 7.59E<br>+04 | 1.04E<br>+05 | 7.60E<br>+04 | 7.28E<br>+04 | 8.61E<br>+04 | 1.06E<br>+05 | 1.54E<br>+05 | 9.58E<br>+04 | 1.61E<br>+05 | 1.11E<br>+05 | 8.10E<br>+04 | 4.56E<br>+04 | C00<br>187 |
| Mad185  | Aminopurine                                   | Others        | 6.75E<br>+05 | 5.39E<br>+05 | 7.26E<br>+05 | 1.89E<br>+06 | 1.83E<br>+06 | 1.67E<br>+06 | 5.10E<br>+05 | 3.58E<br>+05 | 3.47E<br>+05 | 2.05E<br>+05 | 2.34E<br>+05 | 2.15E<br>+05 | 3.55E<br>+05 | 2.68E<br>+05 | 2.66E<br>+05 | --         |
| Mad262  | 4-Methyl-5-thiazoleethanol                    | Others        | 1.10E<br>+05 | 1.03E<br>+05 | 1.13E<br>+05 | 4.11E<br>+04 | 3.22E<br>+04 | 5.41E<br>+04 | 7.28E<br>+04 | 5.82E<br>+04 | 1.04E<br>+05 | 1.32E<br>+05 | 1.24E<br>+05 | 1.29E<br>+05 | 2.16E<br>+05 | 1.56E<br>+05 | 1.48E<br>+05 | C04<br>294 |
| Mad690  | Azoxystrobin acid                             | Others        | 8.23E<br>+04 | 7.00E<br>+04 | 7.43E<br>+04 | 3.96E<br>+04 | 4.88E<br>+04 | 7.96E<br>+04 | 4.45E<br>+04 | 8.10E<br>+04 | 4.97E<br>+04 | 1.18E<br>+05 | 1.35E<br>+05 | 1.78E<br>+04 | 4.63E<br>+04 | 4.35E<br>+04 | 3.83E<br>+04 | --         |
| Mad701  | D-erythro-Dihydrosphingosine                  | Others        | 8.03E<br>+04 | 8.96E<br>+04 | 8.02E<br>+04 | 3.36E<br>+05 | 4.10E<br>+05 | 4.50E<br>+05 | 2.07E<br>+05 | 1.77E<br>+05 | 1.29E<br>+05 | 1.37E<br>+05 | 1.67E<br>+05 | 8.30E<br>+04 | 7.77E<br>+04 | 1.39E<br>+05 | 1.41E<br>+05 | --         |
| Mad420  | Phellodensin F                                | Others        | 6.27E<br>+03 | 9.71E<br>+03 | 1.11E<br>+04 | 1.87E<br>+04 | 3.32E<br>+04 | 1.85E<br>+04 | 9.00E<br>+00 | 9.00E<br>+00 | 9.00E<br>+00 | 4.11E<br>+03 | 9.00E<br>+00 | 9.00E<br>+00 | 6.84E<br>+03 | 9.00E<br>+03 | 7.38E<br>+03 | --         |
| Mad653  | N-Lauryldiethanolamine                        | Others        | 2.36E<br>+04 | 2.60E<br>+04 | 2.29E<br>+04 | 2.95E<br>+04 | 3.03E<br>+04 | 2.68E<br>+04 | 2.33E<br>+04 | 2.43E<br>+04 | 2.69E<br>+04 | 2.33E<br>+04 | 2.01E<br>+04 | 3.06E<br>+04 | 3.26E<br>+04 | 2.27E<br>+04 | 1.87E<br>+04 | --         |
| Mad763  | Phthalic anhydride                            | Others        | 9.79E<br>+04 | 8.82E<br>+04 | 9.43E<br>+04 | 1.12E<br>+05 | 1.65E<br>+05 | 1.71E<br>+05 | 6.02E<br>+04 | 5.74E<br>+04 | 7.75E<br>+04 | 1.05E<br>+05 | 8.06E<br>+04 | 6.20E<br>+04 | 1.39E<br>+05 | 1.16E<br>+05 | 8.17E<br>+04 | --         |
| Mad230  | 10-Formyl-THF                                 | Others        | 3.45E<br>+05 | 3.66E<br>+05 | 3.75E<br>+05 | 5.19E<br>+05 | 4.59E<br>+05 | 4.64E<br>+05 | 4.55E<br>+05 | 2.80E<br>+05 | 4.21E<br>+05 | 2.26E<br>+05 | 2.83E<br>+05 | 1.07E<br>+05 | 4.05E<br>+05 | 1.71E<br>+05 | 1.27E<br>+05 | C00<br>234 |

|         |                                                         |               |              |              |              |              |              |              |              |              |              |              |              |              |              |              |              |            |
|---------|---------------------------------------------------------|---------------|--------------|--------------|--------------|--------------|--------------|--------------|--------------|--------------|--------------|--------------|--------------|--------------|--------------|--------------|--------------|------------|
| Mad669  | Cocamidopropyl betaine                                  | Others        | 9.68E<br>+04 | 1.08E<br>+05 | 1.34E<br>+05 | 1.07E<br>+05 | 1.04E<br>+05 | 1.15E<br>+05 | 1.01E<br>+05 | 1.28E<br>+05 | 1.50E<br>+05 | 1.21E<br>+05 | 1.29E<br>+05 | 1.88E<br>+05 | 1.81E<br>+05 | 1.09E<br>+05 | 1.07E<br>+05 | --         |
| Mad1013 | Syringaldehyde O-glucoside                              | Others        | 8.01E<br>+03 | 8.82E<br>+03 | 9.44E<br>+03 | 2.99E<br>+04 | 3.87E<br>+04 | 2.71E<br>+04 | 9.00E<br>+00 | 9.00E<br>+00 | 9.00E<br>+00 | 9.00E<br>+00 | 9.00E<br>+00 | 9.00E<br>+00 | 9.00E<br>+00 | 9.00E<br>+00 | 9.00E<br>+00 | --         |
| Mad791  | Inositol                                                | Others        | 2.15E<br>+05 | 2.33E<br>+05 | 2.65E<br>+05 | 2.37E<br>+05 | 2.60E<br>+05 | 2.78E<br>+05 | 2.94E<br>+05 | 3.16E<br>+05 | 2.56E<br>+05 | 3.02E<br>+05 | 3.06E<br>+05 | 2.20E<br>+05 | 5.53E<br>+05 | 5.87E<br>+05 | 3.53E<br>+05 | C00<br>137 |
| Mad776  | sesamol                                                 | Others        | 9.20E<br>+04 | 9.00E<br>+04 | 7.64E<br>+04 | 9.52E<br>+04 | 8.29E<br>+04 | 9.10E<br>+04 | 1.03E<br>+05 | 3.21E<br>+04 | 5.20E<br>+04 | 9.42E<br>+04 | 5.86E<br>+04 | 7.98E<br>+04 | 7.14E<br>+04 | 6.86E<br>+04 | 4.93E<br>+04 | --         |
| Mad43   | L-Carnitine                                             | Others        | 3.58E<br>+04 | 3.37E<br>+04 | 4.22E<br>+04 | 4.20E<br>+04 | 3.87E<br>+04 | 4.06E<br>+04 | 3.38E<br>+04 | 9.00E<br>+00 | 9.00E<br>+00 | 4.77E<br>+04 | 5.07E<br>+04 | 4.70E<br>+04 | 9.00E<br>+00 | 3.41E<br>+04 | 3.10E<br>+04 | C00<br>318 |
| Mad238  | Phenethylamine                                          | Others        | 1.26E<br>+05 | 9.29E<br>+04 | 1.40E<br>+05 | 9.06E<br>+04 | 8.04E<br>+04 | 8.18E<br>+04 | 2.24E<br>+05 | 1.47E<br>+05 | 1.78E<br>+05 | 1.06E<br>+05 | 1.24E<br>+05 | 1.14E<br>+05 | 1.65E<br>+05 | 1.34E<br>+05 | 1.04E<br>+05 | C05<br>332 |
| Mad20   | Diethanolamine                                          | Others        | 5.40E<br>+04 | 4.39E<br>+04 | 5.32E<br>+04 | 5.82E<br>+04 | 7.59E<br>+04 | 5.25E<br>+04 | 5.62E<br>+04 | 5.73E<br>+04 | 5.91E<br>+04 | 4.08E<br>+04 | 5.14E<br>+04 | 3.59E<br>+04 | 1.59E<br>+04 | 4.34E<br>+04 | 5.23E<br>+04 | C06<br>772 |
| Mad904  | NADP                                                    | Others        | 1.67E<br>+05 | 1.73E<br>+05 | 1.33E<br>+05 | 1.10E<br>+05 | 8.54E<br>+04 | 1.32E<br>+05 | 1.02E<br>+05 | 1.38E<br>+05 | 1.43E<br>+05 | 1.29E<br>+05 | 1.62E<br>+05 | 1.20E<br>+05 | 2.39E<br>+05 | 1.77E<br>+05 | 2.18E<br>+05 | C00<br>006 |
| Mad10   | 4-Nitrophenol                                           | Others        | 5.01E<br>+07 | 4.70E<br>+07 | 5.10E<br>+07 | 5.44E<br>+07 | 5.47E<br>+07 | 5.40E<br>+07 | 4.16E<br>+07 | 4.56E<br>+07 | 5.05E<br>+07 | 5.04E<br>+07 | 5.55E<br>+07 | 5.68E<br>+07 | 3.93E<br>+07 | 3.36E<br>+07 | 4.33E<br>+07 | C00<br>870 |
| Mad807  | O-Phosphorylethanolamine                                | Others        | 2.23E<br>+04 | 2.05E<br>+04 | 2.46E<br>+04 | 3.31E<br>+04 | 2.98E<br>+04 | 4.37E<br>+04 | 1.63E<br>+04 | 1.54E<br>+04 | 1.38E<br>+04 | 5.70E<br>+03 | 1.48E<br>+04 | 8.38E<br>+03 | 7.88E<br>+03 | 1.45E<br>+04 | 2.22E<br>+04 | C00<br>346 |
| Mad13   | 4-(Aminomethyl)-5-(hydroxymethyl)-2-methylpyridin-3-ol  | Others        | 2.21E<br>+04 | 1.88E<br>+04 | 2.84E<br>+04 | 1.85E<br>+04 | 2.96E<br>+04 | 2.11E<br>+04 | 1.08E<br>+04 | 1.89E<br>+04 | 1.85E<br>+04 | 1.50E<br>+04 | 9.61E<br>+03 | 2.62E<br>+04 | 2.49E<br>+04 | 2.50E<br>+04 | 3.42E<br>+04 | C00<br>534 |
| Mad923  | DI-Glyceraldehyde3-phosphate                            | Others        | 1.40E<br>+05 | 1.52E<br>+05 | 1.44E<br>+05 | 2.06E<br>+05 | 2.11E<br>+05 | 1.97E<br>+05 | 1.51E<br>+05 | 1.28E<br>+05 | 1.25E<br>+05 | 1.37E<br>+05 | 7.82E<br>+04 | 9.42E<br>+04 | 1.51E<br>+05 | 1.28E<br>+05 | 1.22E<br>+05 | --         |
| Mad2    | Spermidine                                              | Phenolamides  | 7.00E<br>+05 | 5.90E<br>+05 | 6.69E<br>+05 | 2.52E<br>+06 | 2.43E<br>+06 | 2.79E<br>+06 | 1.52E<br>+05 | 2.48E<br>+05 | 2.97E<br>+05 | 1.75E<br>+05 | 2.15E<br>+05 | 2.38E<br>+05 | 2.43E<br>+05 | 7.27E<br>+04 | 8.83E<br>+04 | C00<br>315 |
| Mad240  | N',N''',N''''-p-coumaroyl-cinnamoyl-caffeoyl spermidine | Phenolamides  | 3.45E<br>+03 | 3.43E<br>+03 | 2.92E<br>+03 | 9.11E<br>+03 | 1.44E<br>+04 | 6.14E<br>+03 | 2.52E<br>+03 | 9.00E<br>+00 | 9.00E<br>+00 | 9.00E<br>+00 | 9.00E<br>+00 | 9.00E<br>+00 | 9.00E<br>+00 | 9.00E<br>+00 | 9.00E<br>+00 | --         |
| Mad11   | Agmatine                                                | Phenolamides  | 9.89E<br>+03 | 7.76E<br>+03 | 1.05E<br>+04 | 2.69E<br>+04 | 2.78E<br>+04 | 2.53E<br>+04 | 6.58E<br>+03 | 4.46E<br>+03 | 4.72E<br>+03 | 5.05E<br>+03 | 9.00E<br>+00 | 9.00E<br>+00 | 9.61E<br>+03 | 3.29E<br>+04 | 1.58E<br>+04 | C00<br>179 |
| Mad228  | N'-p-Coumaroyl putrescine                               | Phenolamides  | 1.79E<br>+04 | 2.27E<br>+04 | 1.76E<br>+04 | 4.86E<br>+04 | 5.24E<br>+04 | 6.51E<br>+04 | 9.00E<br>+00 | 9.00E<br>+00 | 9.00E<br>+00 | 9.00E<br>+00 | 9.78E<br>+03 | 9.00E<br>+00 | 8.09E<br>+03 | 1.15E<br>+04 | 9.00E<br>+00 | --         |
| Mad585  | N-Feruloyl tyramine                                     | Phenolamides  | 1.84E<br>+04 | 1.92E<br>+04 | 1.85E<br>+04 | 1.95E<br>+05 | 9.00E<br>+00 | 9.00E<br>+00 | 9.00E<br>+00 | 8.22E<br>+03 | 9.00E<br>+00 | 9.00E<br>+00 | 9.00E<br>+00 | 9.00E<br>+00 | 9.00E<br>+00 | 9.00E<br>+00 | 1.34E<br>+04 | --         |
| Mad1    | Spermine                                                | Phenolamides  | 9.40E<br>+06 | 1.02E<br>+07 | 1.06E<br>+07 | 9.65E<br>+06 | 1.05E<br>+07 | 9.93E<br>+06 | 1.05E<br>+07 | 1.06E<br>+07 | 9.13E<br>+06 | 8.46E<br>+06 | 6.80E<br>+06 | 7.05E<br>+06 | 9.73E<br>+06 | 9.98E<br>+06 | 9.99E<br>+06 | C00<br>750 |
| Mad7    | Putrescine                                              | Phenolamides  | 7.62E<br>+05 | 8.17E<br>+05 | 8.38E<br>+05 | 9.69E<br>+05 | 1.17E<br>+06 | 1.57E<br>+06 | 5.88E<br>+05 | 5.18E<br>+05 | 5.64E<br>+05 | 2.58E<br>+05 | 5.10E<br>+05 | 1.56E<br>+05 | 1.29E<br>+06 | 8.59E<br>+05 | 3.96E<br>+05 | C00<br>134 |
| Mad170  | Kinetin 9-riboside                                      | Phytohormones | 3.65E<br>+05 | 2.57E<br>+05 | 3.44E<br>+05 | 1.78E<br>+05 | 2.36E<br>+05 | 2.32E<br>+05 | 4.61E<br>+05 | 2.26E<br>+05 | 2.80E<br>+05 | 2.73E<br>+05 | 3.18E<br>+05 | 3.40E<br>+05 | 4.89E<br>+05 | 3.42E<br>+05 | 3.97E<br>+05 | --         |
| Mad217  | trans-zeatin N-glucoside                                | Phytohormones | 4.44E<br>+05 | 3.84E<br>+05 | 4.74E<br>+05 | 2.36E<br>+05 | 2.40E<br>+05 | 2.36E<br>+05 | 2.16E<br>+05 | 2.24E<br>+05 | 2.70E<br>+05 | 3.40E<br>+05 | 4.66E<br>+05 | 3.73E<br>+05 | 1.39E<br>+06 | 7.70E<br>+05 | 6.34E<br>+05 | --         |
| Mad976  | Salicylic acid O-glucoside                              | Phytohormones | 2.22E<br>+06 | 2.44E<br>+06 | 2.33E<br>+06 | 4.14E<br>+06 | 5.43E<br>+06 | 4.76E<br>+06 | 1.64E<br>+06 | 1.16E<br>+06 | 9.88E<br>+05 | 1.12E<br>+06 | 1.47E<br>+06 | 1.02E<br>+06 | 2.09E<br>+06 | 2.03E<br>+06 | 1.73E<br>+06 | --         |
| Mad566  | Indole 3-acetic acid (IAA)                              | Phytohormones | 1.05E<br>+04 | 9.76E<br>+03 | 7.38E<br>+03 | 9.35E<br>+03 | 6.18E<br>+03 | 5.63E<br>+03 | 8.23E<br>+03 | 7.83E<br>+03 | 8.08E<br>+03 | 7.48E<br>+03 | 1.03E<br>+04 | 5.24E<br>+03 | 1.15E<br>+04 | 8.17E<br>+03 | 3.37E<br>+03 | C00<br>954 |
| Mad1290 | (+)-Jasmonic acid (JA)                                  | Phytohormones | 1.54E<br>+05 | 1.44E<br>+05 | 1.47E<br>+05 | 6.09E<br>+05 | 6.02E<br>+05 | 4.49E<br>+05 | 3.77E<br>+04 | 2.22E<br>+04 | 2.29E<br>+04 | 5.92E<br>+03 | 2.18E<br>+04 | 9.00E<br>+00 | 1.27E<br>+04 | 4.50E<br>+03 | 1.48E<br>+04 | C08<br>491 |
| Mad1252 | (+)-cis,trans-Abscisic acid (ABA)                       | Phytohormones | 2.97E<br>+05 | 2.69E<br>+05 | 2.65E<br>+05 | 1.68E<br>+05 | 1.59E<br>+05 | 1.47E<br>+05 | 1.90E<br>+05 | 2.12E<br>+05 | 2.05E<br>+05 | 4.20E<br>+05 | 6.63E<br>+05 | 4.47E<br>+05 | 3.47E<br>+05 | 1.84E<br>+05 | 3.32E<br>+05 | C06<br>082 |

|         |                                                   |                             |              |              |              |              |              |              |              |              |              |              |              |              |              |              |              |              |    |
|---------|---------------------------------------------------|-----------------------------|--------------|--------------|--------------|--------------|--------------|--------------|--------------|--------------|--------------|--------------|--------------|--------------|--------------|--------------|--------------|--------------|----|
| Mad1312 | N-[(-)-Jasmonoyl]-(L)-Isoleucine (JA-L-Ile)       | Phytohormones               | 5.01E<br>+04 | 4.68E<br>+04 | 4.75E<br>+04 | 2.17E<br>+05 | 2.06E<br>+05 | 1.62E<br>+05 | 5.29E<br>+03 | 2.57E<br>+03 | 6.44E<br>+03 | 2.15E<br>+03 | 6.82E<br>+03 | 1.28E<br>+03 | 6.50E<br>+03 | 9.00E<br>+00 | 2.53E<br>+03 | --           |    |
| Mad1133 | Procyanidin A1                                    | Proanthocyanidins           | 1.01E<br>+05 | 1.01E<br>+05 | 9.96E<br>+04 | 2.65E<br>+05 | 2.62E<br>+05 | 2.99E<br>+05 | 9.00E<br>+00 | 9.00E<br>+00 | 9.00E<br>+00 | 9.00E<br>+00 | 9.00E<br>+00 | 9.00E<br>+00 | 9.00E<br>+00 | 9.00E<br>+00 | 9.00E<br>+00 | 9.00E<br>+00 | -- |
| Mad1175 | Procyanidin A2                                    | Proanthocyanidins           | 9.83E<br>+04 | 9.40E<br>+04 | 1.02E<br>+05 | 9.00E<br>+00 | 9.00E<br>+00 | 9.00E<br>+00 | 9.98E<br>+04 | 6.26E<br>+04 | 7.74E<br>+04 | 2.06E<br>+04 | 3.50E<br>+04 | 1.01E<br>+05 | 1.51E<br>+05 | 6.26E<br>+04 | 2.09E<br>+04 | --           |    |
| Mad1076 | Procyanidin B2                                    | Proanthocyanidins           | 4.03E<br>+07 | 4.00E<br>+07 | 3.93E<br>+07 | 4.56E<br>+07 | 4.70E<br>+07 | 4.64E<br>+07 | 4.49E<br>+07 | 3.91E<br>+07 | 3.92E<br>+07 | 3.74E<br>+07 | 3.15E<br>+07 | 3.42E<br>+07 | 4.10E<br>+07 | 3.46E<br>+07 | 2.84E<br>+07 | --           |    |
| Mad1058 | Procyanidin B3                                    | Proanthocyanidins           | 3.82E<br>+07 | 3.84E<br>+07 | 3.74E<br>+07 | 4.30E<br>+07 | 4.39E<br>+07 | 4.35E<br>+07 | 4.16E<br>+07 | 3.73E<br>+07 | 3.78E<br>+07 | 3.45E<br>+07 | 2.93E<br>+07 | 3.23E<br>+07 | 3.83E<br>+07 | 3.29E<br>+07 | 2.62E<br>+07 | --           |    |
| Mad177  | 4-Pyridoxic acid                                  | Pyridine derivatives        | 1.46E<br>+05 | 1.62E<br>+05 | 1.66E<br>+05 | 8.97E<br>+04 | 8.39E<br>+04 | 1.00E<br>+05 | 1.63E<br>+05 | 1.36E<br>+05 | 1.45E<br>+05 | 1.37E<br>+05 | 1.95E<br>+05 | 1.72E<br>+05 | 3.71E<br>+05 | 2.15E<br>+05 | 2.39E<br>+05 | C00<br>847   |    |
| Mad390  | 1-O-Feruloyl quinic acid                          | Quinate and its derivatives | 1.99E<br>+05 | 2.04E<br>+05 | 2.36E<br>+05 | 8.33E<br>+05 | 1.32E<br>+06 | 9.18E<br>+05 | 6.12E<br>+04 | 3.25E<br>+04 | 7.47E<br>+04 | 1.71E<br>+04 | 9.56E<br>+03 | 2.47E<br>+04 | 1.68E<br>+04 | 9.95E<br>+03 | 1.57E<br>+04 | --           |    |
| Mad1084 | 5-O-p-Coumaroylquinic acid                        | Quinate and its derivatives | 3.81E<br>+06 | 4.05E<br>+06 | 3.87E<br>+06 | 8.12E<br>+06 | 1.03E<br>+07 | 1.13E<br>+07 | 8.61E<br>+05 | 7.74E<br>+05 | 8.66E<br>+05 | 4.07E<br>+05 | 2.62E<br>+05 | 3.91E<br>+05 | 5.15E<br>+05 | 2.25E<br>+05 | 3.18E<br>+05 | --           |    |
| Mad430  | 5-O-p-Coumaroyl shikimic acid                     | Quinate and its derivatives | 8.22E<br>+04 | 7.71E<br>+04 | 6.31E<br>+04 | 2.14E<br>+05 | 2.34E<br>+05 | 1.43E<br>+05 | 2.86E<br>+04 | 7.97E<br>+03 | 2.19E<br>+04 | 9.00E<br>+00 | 9.00E<br>+00 | 9.00E<br>+00 | 8.63E<br>+03 | 9.00E<br>+00 | 9.00E<br>+00 | --           |    |
| Mad1065 | 4-O-Caffeoyl quinic acid (cryptochlorogenic acid) | Quinate and its derivatives | 6.82E<br>+05 | 6.19E<br>+05 | 5.99E<br>+05 | 2.40E<br>+05 | 2.57E<br>+05 | 2.17E<br>+05 | 7.66E<br>+05 | 1.03E<br>+06 | 8.18E<br>+05 | 1.01E<br>+06 | 8.58E<br>+05 | 1.01E<br>+06 | 1.18E<br>+06 | 1.46E<br>+06 | 1.01E<br>+06 | --           |    |
| Mad981  | Homovanilloyl quinic acid                         | Quinate and its derivatives | 1.33E<br>+04 | 1.16E<br>+04 | 1.15E<br>+04 | 1.11E<br>+04 | 2.11E<br>+04 | 1.72E<br>+04 | 9.00E<br>+00 | 1.51E<br>+04 | 1.01E<br>+04 | 1.19E<br>+04 | 1.10E<br>+04 | 1.68E<br>+04 | 1.69E<br>+04 | 8.26E<br>+03 | 1.57E<br>+04 | --           |    |
| Mad983  | Quinic acid O-glucuronic acid                     | Quinate and its derivatives | 1.55E<br>+06 | 1.29E<br>+06 | 1.29E<br>+06 | 4.59E<br>+06 | 5.84E<br>+06 | 1.90E<br>+06 | 5.24E<br>+05 | 5.65E<br>+05 | 7.32E<br>+05 | 4.55E<br>+05 | 4.73E<br>+05 | 1.05E<br>+05 | 2.66E<br>+05 | 2.55E<br>+05 | 2.00E<br>+05 | --           |    |
| Mad1038 | 5-O-p-coumaroyl shikimic acid O-hexoside          | Quinate and its derivatives | 1.91E<br>+05 | 1.72E<br>+05 | 1.84E<br>+05 | 3.09E<br>+05 | 4.79E<br>+05 | 1.73E<br>+05 | 9.01E<br>+04 | 4.18E<br>+04 | 6.92E<br>+04 | 1.46E<br>+04 | 8.62E<br>+04 | 1.42E<br>+05 | 1.92E<br>+05 | 8.66E<br>+04 | 9.81E<br>+04 | --           |    |
| Mad1077 | 3-O-p-coumaroyl shikimic acid O-hexoside          | Quinate and its derivatives | 5.46E<br>+04 | 5.09E<br>+04 | 4.88E<br>+04 | 4.92E<br>+04 | 7.38E<br>+04 | 7.23E<br>+04 | 2.23E<br>+04 | 1.31E<br>+04 | 4.46E<br>+04 | 1.39E<br>+04 | 1.37E<br>+04 | 1.15E<br>+04 | 2.50E<br>+04 | 8.95E<br>+04 | 2.99E<br>+04 | --           |    |
| Mad1105 | O-p-Coumaroyl quinic acid O-rutinoside derivative | Quinate and its derivatives | 2.58E<br>+03 | 4.74E<br>+03 | 4.55E<br>+03 | 1.11E<br>+04 | 1.65E<br>+04 | 9.55E<br>+03 | 9.00E<br>+00 | 9.00E<br>+00 | 9.00E<br>+00 | 9.00E<br>+00 | 9.00E<br>+00 | 9.00E<br>+00 | 9.00E<br>+00 | 9.00E<br>+00 | 9.00E<br>+00 | --           |    |
| Mad1106 | 3-O-p-Coumaroyl quinic acid                       | Quinate and its derivatives | 2.47E<br>+07 | 2.11E<br>+07 | 2.36E<br>+07 | 3.34E<br>+07 | 4.12E<br>+07 | 3.83E<br>+07 | 6.94E<br>+06 | 4.86E<br>+06 | 2.55E<br>+06 | 4.18E<br>+06 | 8.19E<br>+06 | 9.16E<br>+06 | 8.72E<br>+06 | 6.67E<br>+06 | 1.19E<br>+07 | --           |    |
| Mad1169 | 3-O-p-Coumaroyl shikimic acid                     | Quinate and its derivatives | 1.39E<br>+04 | 1.58E<br>+04 | 2.36E<br>+04 | 3.09E<br>+04 | 5.77E<br>+04 | 3.75E<br>+04 | 9.00E<br>+00 | 9.00E<br>+00 | 9.00E<br>+00 | 9.00E<br>+00 | 9.00E<br>+00 | 9.00E<br>+00 | 9.00E<br>+00 | 9.00E<br>+00 | 9.00E<br>+00 | --           |    |
| Mad283  | Chlorogenic acid (3-O-Caffeoylquinic acid)        | Quinate and its derivatives | 1.62E<br>+07 | 1.66E<br>+07 | 1.38E<br>+07 | 3.08E<br>+07 | 1.80E<br>+07 | 3.20E<br>+07 | 3.76E<br>+07 | 3.75E<br>+07 | 3.86E<br>+07 | 3.51E<br>+07 | 3.51E<br>+07 | 3.57E<br>+07 | 3.95E<br>+07 | 3.16E<br>+07 | 3.45E<br>+07 | C00<br>852   |    |
| Mad401  | Chlorogenic acid methyl ester                     | Quinate and its derivatives | 7.13E<br>+05 | 6.89E<br>+05 | 8.57E<br>+05 | 4.77E<br>+06 | 5.11E<br>+06 | 5.44E<br>+06 | 1.80E<br>+05 | 1.80E<br>+05 | 1.81E<br>+05 | 1.04E<br>+05 | 6.87E<br>+04 | 7.87E<br>+04 | 9.00E<br>+04 | 3.47E<br>+04 | 3.92E<br>+04 | --           |    |
| Mad1032 | Neochlorogenic acid (5-O-Caffeoylquinic acid)     | Quinate and its derivatives | 7.61E<br>+06 | 1.37E<br>+07 | 1.47E<br>+07 | 1.31E<br>+07 | 1.15E<br>+07 | 1.53E<br>+07 | 1.73E<br>+07 | 1.85E<br>+07 | 1.26E<br>+07 | 2.12E<br>+07 | 1.49E<br>+07 | 1.81E<br>+07 | 1.94E<br>+07 | 1.61E<br>+07 | 1.47E<br>+07 | --           |    |
| Mad902  | Quinic acid                                       | Quinate and its derivatives | 2.13E<br>+07 | 1.84E<br>+07 | 2.13E<br>+07 | 2.83E<br>+07 | 2.62E<br>+07 | 2.51E<br>+07 | 1.91E<br>+07 | 2.32E<br>+07 | 2.36E<br>+07 | 1.86E<br>+07 | 1.70E<br>+07 | 1.85E<br>+07 | 1.94E<br>+07 | 1.14E<br>+07 | 1.26E<br>+07 | C00<br>296   |    |
| Mad1003 | 1-O-Caffeoyl quinic acid                          | Quinate and its derivatives | 9.99E<br>+05 | 8.84E<br>+05 | 9.38E<br>+05 | 2.69E<br>+06 | 2.29E<br>+06 | 2.05E<br>+06 | 6.33E<br>+05 | 5.92E<br>+05 | 6.03E<br>+05 | 4.80E<br>+05 | 3.02E<br>+05 | 5.02E<br>+05 | 7.37E<br>+05 | 4.03E<br>+05 | 3.84E<br>+05 | --           |    |
| Mad683  | Phytocassane C                                    | Terpenoids                  | 1.41E<br>+05 | 1.59E<br>+05 | 1.56E<br>+05 | 1.64E<br>+05 | 1.87E<br>+05 | 1.86E<br>+05 | 1.82E<br>+05 | 2.62E<br>+05 | 2.79E<br>+05 | 2.09E<br>+05 | 2.86E<br>+05 | 2.83E<br>+05 | 1.77E<br>+05 | 2.17E<br>+05 | 2.87E<br>+05 | --           |    |
| Mad428  | 5-Methoxy-N,N-dimethyltryptamine                  | Tryptamine derivatives      | 1.94E<br>+04 | 1.98E<br>+04 | 2.19E<br>+04 | 9.95E<br>+03 | 9.89E<br>+03 | 7.74E<br>+03 | 2.89E<br>+04 | 1.66E<br>+04 | 9.29E<br>+03 | 3.40E<br>+04 | 3.64E<br>+04 | 8.68E<br>+03 | 1.48E<br>+05 | 3.04E<br>+04 | 2.21E<br>+04 | --           |    |
| Mad431  | N-hexosyl-p-coumaroyl serotonin                   | Tryptamine derivatives      | 3.02E<br>+04 | 4.53E<br>+04 | 4.99E<br>+04 | 2.39E<br>+04 | 3.55E<br>+04 | 2.42E<br>+04 | 3.89E<br>+04 | 2.94E<br>+04 | 7.09E<br>+04 | 6.01E<br>+04 | 5.93E<br>+04 | 6.76E<br>+04 | 9.00E<br>+00 | 8.45E<br>+04 | 6.45E<br>+04 | --           |    |



|         |                                |                        |          |          |          |          |          |          |          |          |          |          |          |          |          |          |          |     |
|---------|--------------------------------|------------------------|----------|----------|----------|----------|----------|----------|----------|----------|----------|----------|----------|----------|----------|----------|----------|-----|
| Mad176  | serotonin                      | Tryptamine derivatives | 6.02E+04 | 4.67E+04 | 5.24E+04 | 4.00E+04 | 4.81E+04 | 5.36E+04 | 4.11E+04 | 4.14E+04 | 2.87E+04 | 5.76E+04 | 1.36E+05 | 3.52E+04 | 6.74E+04 | 9.33E+04 | 2.00E+04 | C00 |
| Mad332  | N-Acetyl-5-hydroxytryptamine   | Tryptamine derivatives | 1.07E+04 | 1.70E+04 | 1.53E+04 | 2.55E+04 | 2.63E+04 | 2.77E+04 | 5.78E+03 | 4.71E+03 | 7.06E+03 | 9.00E+00 | 9.00E+00 | 9.00E+00 | 9.00E+00 | 8.57E+03 | 9.00E+00 | C00 |
| Mad102  | Pyridoxine O-glucoside         | Vitamins               | 1.34E+06 | 1.13E+06 | 1.19E+06 | 1.53E+06 | 1.85E+06 | 1.63E+06 | 9.82E+05 | 7.63E+05 | 7.71E+05 | 1.44E+06 | 9.30E+05 | 1.02E+06 | 2.03E+06 | 1.62E+06 | 1.40E+06 | --  |
| Mad163  | Niacinamide                    | Vitamins               | 1.03E+05 | 1.21E+05 | 1.27E+05 | 3.94E+05 | 3.25E+05 | 4.31E+05 | 7.06E+04 | 5.03E+04 | 6.72E+04 | 3.14E+05 | 3.54E+05 | 2.13E+04 | 4.38E+04 | 4.04E+04 | 3.72E+04 | C00 |
| Mad213  | D-Pantothenic acid             | Vitamins               | 2.36E+06 | 2.45E+06 | 2.41E+06 | 3.52E+06 | 3.63E+06 | 3.25E+06 | 2.15E+06 | 2.33E+06 | 2.09E+06 | 1.05E+06 | 1.72E+06 | 1.46E+06 | 3.00E+06 | 2.46E+06 | 2.02E+06 | C00 |
| Mad323  | Pyridoxine O-feruloyl hexoside | Vitamins               | 8.53E+03 | 1.38E+04 | 1.32E+04 | 5.12E+03 | 1.48E+04 | 9.00E+00 | 2.24E+04 | 1.19E+04 | 9.88E+03 | 1.88E+04 | 9.00E+00 | 9.00E+00 | 2.29E+04 | 7.74E+03 | 9.00E+00 | --  |
| Mad76   | Thiamine                       | Vitamins               | 1.53E+05 | 1.94E+05 | 1.68E+05 | 1.27E+05 | 1.05E+05 | 5.92E+04 | 1.07E+05 | 1.19E+05 | 9.52E+04 | 1.85E+05 | 1.82E+05 | 1.24E+05 | 4.08E+05 | 1.77E+05 | 1.13E+05 | C00 |
| Mad773  | Menaquinone (K2)               | Vitamins               | 4.28E+04 | 5.04E+04 | 3.90E+04 | 4.76E+04 | 4.35E+04 | 4.24E+04 | 4.97E+04 | 2.17E+04 | 3.00E+04 | 3.85E+04 | 3.38E+04 | 4.61E+04 | 4.62E+04 | 3.99E+04 | 3.24E+04 | C00 |
| Mad137  | Pyridoxine 5'-phosphate        | Vitamins               | 1.38E+04 | 1.42E+04 | 1.72E+04 | 7.78E+03 | 9.00E+03 | 3.32E+03 | 1.28E+04 | 1.93E+04 | 1.71E+04 | 2.94E+04 | 1.88E+04 | 2.83E+04 | 1.92E+04 | 9.00E+03 | 1.86E+04 | C00 |
| Mad130  | Pyridoxine                     | Vitamins               | 1.29E+06 | 1.33E+06 | 1.43E+06 | 4.84E+05 | 5.61E+05 | 4.76E+05 | 8.69E+05 | 1.14E+06 | 1.42E+06 | 1.41E+06 | 1.41E+06 | 2.27E+06 | 2.64E+06 | 1.31E+06 | 2.80E+06 | C00 |
| Mad1078 | Riboflavin                     | Vitamins               | 1.28E+04 | 1.20E+04 | 1.08E+04 | 1.70E+04 | 2.00E+04 | 1.05E+04 | 1.74E+04 | 9.15E+03 | 1.01E+04 | 1.13E+04 | 1.28E+04 | 9.42E+03 | 9.85E+03 | 1.54E+04 | 1.26E+04 | C00 |
| Mad139  | Orotic acid                    | Vitamins               | 5.87E+04 | 5.79E+04 | 6.64E+04 | 9.41E+04 | 9.00E+04 | 5.51E+04 | 7.17E+04 | 6.14E+04 | 8.90E+04 | 4.66E+04 | 5.95E+04 | 6.63E+04 | 5.10E+04 | 9.00E+03 | 3.48E+04 | C00 |
| Mad355  | Biotin                         | Vitamins               | 1.30E+05 | 1.10E+05 | 1.17E+05 | 3.29E+05 | 4.02E+05 | 3.25E+05 | 8.24E+04 | 7.99E+04 | 6.87E+04 | 4.43E+04 | 4.20E+04 | 2.76E+04 | 1.04E+05 | 6.52E+04 | 5.04E+04 | C00 |
| Mad1271 | Vitamin D3                     | Vitamins               | 1.94E+04 | 1.80E+04 | 1.91E+04 | 4.21E+04 | 6.20E+04 | 4.92E+04 | 9.00E+04 | 9.00E+04 | 9.00E+04 | 9.00E+04 | 9.00E+04 | 9.00E+04 | 9.00E+04 | 9.00E+04 | 9.00E+04 | C05 |
| Mad1051 | Pantetheine                    | Vitamins               | 1.30E+04 | 9.11E+03 | 9.10E+03 | 2.05E+04 | 2.56E+04 | 4.17E+04 | 9.00E+03 | 5.08E+03 | 3.18E+03 | 5.66E+03 | 9.00E+03 | 9.00E+03 | 9.00E+03 | 6.85E+03 | 5.95E+03 | C00 |
| pme2111 | L-ascorbate                    | Vitamins               | 3.32E+05 | 3.40E+05 | 3.60E+05 | 3.91E+05 | 2.09E+06 | 2.97E+05 | 3.64E+05 | 1.01E+06 | 5.77E+05 | 3.75E+05 | 8.61E+05 | 2.92E+05 | 8.71E+05 | 9.43E+05 | 7.41E+05 | C00 |

**Table S2.** The list of 149 representative metabolites for correlation analysis.

| Class  | Index  | Ion mode | Q1 (Da) | Q3 (Da) | Rt (min) | Molecular Weight (Da) | Ionization model | Compounds                   | Class         | PS1      | PS2      | PS3      | PS4      |
|--------|--------|----------|---------|---------|----------|-----------------------|------------------|-----------------------------|---------------|----------|----------|----------|----------|
| Sugars | Mad828 | Negative | 341     | 58.8    | 0.78     | 342.1162              | [M-H]-           | D-(+)-Sucrose               | Carbohydrates | 9.79E+05 | 9.27E+06 | 1.18E+07 | 1.31E+07 |
|        | Mad51  | Positive | 505.169 | 127     | 0.77     | 504.169               | [M+H]+           | D(+)-Melezitose             | Carbohydrates | 2.15E+04 | 2.14E+05 | 2.72E+05 | 3.38E+05 |
|        | Mad819 | Negative | 179     | 70.9    | 0.77     | 180.063               | [M-H]-           | D(+)-Glucose                | Carbohydrates | 1.37E+06 | 4.88E+06 | 7.14E+06 | 6.49E+06 |
|        | Mad841 | Negative | 149     | 58.9    | 0.81     | 150.053               | [M-H]-           | DL-Arabinose                | Carbohydrates | 1.07E+05 | 3.28E+05 | 4.48E+05 | 4.04E+05 |
|        | Mad869 | Negative | 289.1   | 97      | 1.16     | 290.1                 | [M-H]-           | Glucarate O-Phosphoric acid | Carbohydrates | 1.07E+07 | 3.30E+06 | 2.14E+06 | 2.71E+06 |
|        | Mad4   | Positive | 197.058 | 153     | 0.59     | 196.0583              | [M+H]+           | Gluconic acid               | Carbohydrates | 3.35E+04 | 5.54E+03 | 9.00E+00 | 5.54E+03 |

|                    |          |          |             |       |          |          |                |                                          |                                |          |          |          |          |
|--------------------|----------|----------|-------------|-------|----------|----------|----------------|------------------------------------------|--------------------------------|----------|----------|----------|----------|
| Sugars<br>alcohols | Mad860   | Negative | 259         | 96.9  | 0.99     | 260.03   | [M-H]-         | D-Glucose 6-phosphate                    | Carbohydrates                  | 1.60E+06 | 2.15E+06 | 9.30E+05 | 8.93E+05 |
|                    | Mad55    | Positive | 183         | 59.3  | 0.77     | 182.079  | [M+H]+         | D-Sorbitol                               | Alcohols and polyols           | 5.70E+06 | 4.58E+06 | 5.69E+06 | 4.48E+06 |
|                    | Mad56    | Positive | 183.08      | 111   | 0.77     | 182.079  | [M+H]+         | D-Mannitol                               | Alcohols and polyols           | 1.43E+07 | 1.27E+07 | 1.56E+07 | 1.19E+07 |
|                    | Mad805   | Negative | 181.08      | 70.8  | 0.76     | 182.079  | [M-H]-         | Dulcitol                                 | Alcohols and polyols           | 3.59E+06 | 4.22E+06 | 5.35E+06 | 2.96E+06 |
| Nucleotides        | Mad791   | Negative | 179.15<br>7 | 87    | 0.74     | 180.0634 | [M-H]-         | Inositol                                 | Others                         | 2.58E+05 | 2.89E+05 | 2.76E+05 | 4.98E+05 |
|                    | Mad97    | Positive | 153         | 136.4 | 1.17     | 152      | [M+H]+         | Xanthine                                 | Nucleotide and its derivatives | 8.60E+04 | 3.44E+03 | 2.22E+03 | 9.00E+00 |
|                    | Mad157   | Positive | 245.1       | 113   | 1.42     | 244.0695 | [M+H]+         | Uridine                                  | Nucleotide and its derivatives | 1.29E+07 | 3.41E+06 | 1.13E+06 | 1.51E+06 |
|                    | Mad29    | Positive | 112         | 95    | 0.73     | 111.0433 | [M+H]+         | Cytosine                                 | Nucleotide and its derivatives | 1.38E+06 | 5.48E+05 | 3.11E+05 | 3.91E+05 |
|                    | Mad120   | Positive | 136.1       | 136.1 | 1.21     | 135.0545 | [M+H]+         | Adenine                                  | Nucleotide and its derivatives | 7.45E+05 | 1.77E+05 | 5.76E+04 | 6.39E+04 |
|                    | Mad107   | Positive | 113.02<br>7 | 95.9  | 1.19     | 112.027  | [M+H]+         | Uracil                                   | Nucleotide and its derivatives | 1.50E+06 | 2.84E+05 | 1.03E+05 | 1.58E+05 |
|                    | Mad109   | Positive | 152         | 135.1 | 1.19     | 151.049  | [M+H]+         | Guanine                                  | Nucleotide and its derivatives | 2.99E+05 | 3.64E+04 | 1.68E+04 | 2.15E+04 |
| Amino acids        | Mad74    | Positive | 162.1       | 98.3  | 0.81     | 161.1    | [M+H]+         | 2-Aminoadipic acid (L-Homoglutamic acid) | Amino acids                    | 1.16E+05 | 5.51E+04 | 3.86E+04 | 7.40E+04 |
|                    | Mad65    | Positive | 116.1       | 70    | 0.79     | 115.0633 | [M+H]+         | L-Proline                                | Amino acids                    | 8.60E+06 | 6.56E+06 | 2.30E+06 | 2.30E+06 |
|                    | Mad39    | Positive | 176.1       | 98.9  | 0.76     | 175.0957 | [M+H]+         | L-Citrulline                             | Amino acids                    | 3.49E+05 | 2.87E+05 | 2.38E+05 | 2.78E+05 |
|                    | Mad33    | Positive | 106         | 59.9  | 0.75     | 105.0426 | [M+H]+         | L-Serine                                 | Amino acids                    | 7.74E+05 | 6.65E+05 | 6.01E+05 | 5.39E+05 |
|                    | Mad812   | Negative | 132         | 99.9  | 0.77     | 133.0375 | [M-H]-         | L-Aspartic acid                          | Amino acids                    | 1.35E+06 | 5.99E+06 | 4.11E+06 | 1.05E+07 |
|                    | Mad813   | Negative | 146.1       | 102.1 | 0.77     | 147.0532 | [M-H]-         | L-Glutamic acid                          | Amino acids                    | 4.00E+06 | 7.34E+06 | 3.81E+06 | 8.75E+06 |
|                    | Mad141   | Positive | 132.1       | 86    | 1.27     | 131.0946 | [M+H]+         | L-Leucine                                | Amino acids                    | 1.26E+07 | 6.62E+06 | 5.17E+06 | 9.00E+06 |
|                    | Mad196   | Positive | 166         | 120.1 | 1.96     | 165.079  | [M+H]+         | L-Phenylalanine                          | Amino acids                    | 3.12E+07 | 3.81E+07 | 1.50E+07 | 1.39E+07 |
|                    | Mad793   | Negative | 118         | 100.9 | 0.75     | 119.0582 | [M-H]-         | L-Threonine                              | Amino acids                    | 6.97E+04 | 1.40E+05 | 1.35E+05 | 2.13E+05 |
|                    | Mad15    | Positive | 147         | 83.2  | 0.67     | 146.1055 | [M+H]+         | L-(+)-Lysine                             | Amino acids                    | 2.62E+05 | 2.86E+05 | 2.45E+05 | 4.01E+05 |
|                    | Mad781   | Negative | 154.1       | 92.9  | 0.67     | 155.0695 | [M-H]-         | L-Histidine                              | Amino acids                    | 7.71E+03 | 3.48E+04 | 2.19E+04 | 5.18E+04 |
| Mad78              | Positive | 118.1    | 71.8        | 0.81  | 117.079  | [M+H]+   | L-Valine       | Amino acids                              | 2.18E+07                       | 1.00E+07 | 6.24E+06 | 1.03E+07 |          |
| Mad131             | Positive | 132      | 85.9        | 1.23  | 131.0946 | [M+H]+   | L-Isoleucine   | Amino acids                              | 1.60E+07                       | 8.57E+06 | 1.49E+07 | 2.33E+07 |          |
| Mad784             | Negative | 173.1    | 131.1       | 0.69  | 174.1117 | [M-H]-   | L-(+)-Arginine | Amino acids                              | 4.68E+04                       | 1.89E+05 | 7.26E+04 | 9.42E+04 |          |

|               |         |          |         |       |       |          |        |                                               |                             |          |          |          |          |
|---------------|---------|----------|---------|-------|-------|----------|--------|-----------------------------------------------|-----------------------------|----------|----------|----------|----------|
|               | Mad796  | Negative | 118.1   | 101   | 0.75  | 119.0582 | [M-H]- | L-Homoserine                                  | Amino acids                 | 1.47E+04 | 2.32E+04 | 1.68E+04 | 2.17E+04 |
|               | Mad797  | Negative | 131.054 | 71.8  | 0.75  | 132.054  | [M-H]- | L-Asparagine                                  | Amino acids                 | 7.45E+06 | 1.55E+07 | 1.57E+07 | 2.38E+07 |
|               | Mad61   | Positive | 122.02  | 80.1  | 0.78  | 121.02   | [M+H]+ | L-Cysteine                                    | Amino acids                 | 7.12E+03 | 5.72E+03 | 1.02E+04 | 1.39E+04 |
|               | Mad136  | Positive | 138.084 | 103   | 1.25  | 137.084  | [M+H]+ | L-Tyramine                                    | Amino acids                 | 3.65E+04 | 6.42E+03 | 4.78E+03 | 5.20E+03 |
|               | Mad894  | Negative | 180.1   | 163   | 1.21  | 181.074  | [M-H]- | L-(-)-Tyrosine                                | Amino acids                 | 7.29E+04 | 1.37E+05 | 1.41E+04 | 2.10E+04 |
|               | Mad105  | Positive | 150     | 72.8  | 1.18  | 149.051  | [M+H]+ | L-Methionine                                  | Amino acids                 | 4.68E+05 | 4.54E+06 | 2.36E+06 | 1.59E+06 |
|               | Mad798  | Negative | 145.069 | 127.1 | 0.75  | 146.069  | [M-H]- | L-Glutamine                                   | Amino acids                 | 1.32E+04 | 6.35E+04 | 4.28E+04 | 9.48E+04 |
|               | Mad42   | Positive | 90.048  | 71.8  | 0.76  | 89.048   | [M+H]+ | L-Alanine                                     | Amino acids                 | 1.91E+06 | 7.88E+05 | 4.31E+05 | 4.15E+05 |
|               | Mad233  | Positive | 205.1   | 146.1 | 2.36  | 204.09   | [M+H]+ | L-Tryptophan                                  | Amino acids                 | 7.20E+06 | 4.59E+06 | 1.46E+06 | 2.59E+06 |
|               | Mad12   | Positive | 133     | 70    | 0.65  | 132.16   | [M+H]+ | L(+)-Ornithine                                | Amino acids                 | 7.40E+06 | 5.77E+06 | 4.60E+06 | 6.96E+06 |
|               | Mad88   | Positive | 118     | 88    | 0.85  | 117.079  | [M+H]+ | DI-Norvaline                                  | Amino acids                 | 2.07E+07 | 9.47E+06 | 6.03E+06 | 9.56E+06 |
|               | Mad82   | Positive | 269     | 134   | 0.81  | 268.055  | [M+H]+ | L-Homocystine                                 | Amino acids                 | 7.44E+05 | 6.25E+04 | 1.19E+04 | 7.31E+03 |
| Fatty acids   | Mad746  | Positive | 496.3   | 478.3 | 8.65  | 495.3    | [M+H]+ | LysoPC 16:0                                   | Lipids_Glycerophospholipids | 6.94E+06 | 1.43E+06 | 2.24E+06 | 6.26E+06 |
|               | Mad1344 | Negative | 452     | 255.3 | 8.57  | 453      | [M-H]- | LysoPE 16:0                                   | Lipids_Glycerophospholipids | 2.42E+06 | 6.06E+05 | 1.20E+06 | 2.37E+06 |
|               | Mad741  | Positive | 496.33  | 478.3 | 8.49  | 495.33   | [M+H]+ | LysoPC 16:0 (2n isomer)                       | Lipids_Glycerophospholipids | 7.59E+06 | 1.48E+06 | 2.25E+06 | 6.63E+06 |
|               | Mad764  | Positive | 524.36  | 507.4 | 9.57  | 523.36   | [M+H]+ | LysoPC 18:0                                   | Lipids_Glycerophospholipids | 1.37E+06 | 2.01E+05 | 3.09E+05 | 1.32E+06 |
|               | Mad1343 | Negative | 452.3   | 255.3 | 8.4   | 453.3    | [M-H]- | LysoPE 16:0 (2n isomer)                       | Lipids_Glycerophospholipids | 3.92E+06 | 9.37E+05 | 1.81E+06 | 3.57E+06 |
|               | Mad759  | Positive | 295.2   | 179.5 | 9.17  | 294.2    | [M+H]+ | 9-Hydroxy-(10E,12Z,15Z)-octadecatrienoic acid | Lipids_Fatty acids          | 1.05E+05 | 2.19E+04 | 4.54E+04 | 1.88E+05 |
|               | Mad751  | Positive | 279.3   | 201.5 | 8.81  | 278.3    | [M+H]+ | Punicic acid                                  | Lipids_Fatty acids          | 2.24E+05 | 4.24E+04 | 6.87E+04 | 2.55E+05 |
|               | Mad762  | Positive | 279.2   | 149.4 | 9.55  | 278.2    | [M+H]+ | Octadeca-11E,13E,15Z-trienoic acid            | Lipids_Fatty acids          | 9.28E+06 | 4.46E+06 | 5.58E+06 | 6.61E+06 |
|               | Mad682  | Positive | 318.3   | 300.9 | 6.63  | 317.3    | [M+H]+ | 4-Hydroxysphinganine                          | Lipids_Fatty acids          | 9.13E+06 | 1.12E+07 | 1.19E+07 | 1.03E+07 |
|               | Mad1350 | Negative | 199     | 181.3 | 9.52  | 200      | [M-H]- | Lauric acid (C12:0)                           | Lipids_Fatty acids          | 3.71E+03 | 3.24E+03 | 3.24E+03 | 3.16E+03 |
|               | Mad1357 | Negative | 277.1   | 233.7 | 10.47 | 278.1    | [M-H]- | $\alpha$ -Linolenic acid                      | Lipids_Fatty acids          | 7.76E+03 | 9.00E+00 | 9.00E+00 | 9.00E+00 |
| Organic acids | Mad994  |          |         |       |       |          |        | L(-)-Malic acid                               | Organic acids               | 2.23E+07 | 2.11E+07 | 1.75E+07 | 1.32E+07 |
|               | Mad861  | Negative | 147     | 85    | 1     | 148      | [M-H]- | Citramalate                                   | Organic acids               | 1.07E+07 | 2.17E+06 | 9.66E+06 | 2.45E+07 |

|                              |         |          |          |       |      |          |        |                                               |                              |          |          |          |          |
|------------------------------|---------|----------|----------|-------|------|----------|--------|-----------------------------------------------|------------------------------|----------|----------|----------|----------|
|                              | Mad1048 | Negative | 175.1    | 131.3 | 2.73 | 176.1    | [M-H]- | 2-Isopropylmalate                             | Organic acids                | 1.66E+05 | 1.18E+05 | 1.83E+05 | 3.87E+05 |
|                              | Mad863  | Negative | 173.053  | 92.9  | 1.05 | 174.0528 | [M-H]- | Shikimic acid                                 | Organic acids                | 2.38E+06 | 6.79E+05 | 2.07E+05 | 3.57E+05 |
|                              | Mad928  | Negative | 117.03   | 99.9  | 1.31 | 118.027  | [M-H]- | Succinic acid                                 | Organic acids                | 3.24E+07 | 1.07E+07 | 4.72E+06 | 2.43E+06 |
|                              | Mad909  | Negative | 149      | 72.8  | 1.23 | 150.016  | [M-H]- | L-(+)-Tartaric acid                           | Organic acids                | 2.45E+05 | 4.18E+04 | 2.20E+05 | 4.92E+05 |
|                              | Mad842  | Negative | 191      | 131   | 0.81 | 192.027  | [M-H]- | Citric acid                                   | Organic acids                | 8.06E+07 | 8.53E+07 | 9.10E+07 | 8.71E+07 |
|                              | Mad919  | Negative | 115      | 97.9  | 1.24 | 116.011  | [M-H]- | Fumaric acid                                  | Organic acids                | 1.64E+06 | 9.00E+00 | 9.00E+00 | 9.00E+00 |
|                              | Mad903  | Negative | 145      | 80.8  | 1.22 | 146.022  | [M-H]- | A-Ketoglutaric acid                           | Organic acids                | 2.76E+06 | 4.06E+05 | 2.14E+05 | 1.92E+05 |
|                              | Mad9    | Positive | 175      | 98.9  | 0.61 | 174.016  | [M+H]+ | trans-Citridic acid                           | Organic acids                | 4.18E+05 | 2.91E+05 | 5.75E+05 | 2.41E+05 |
|                              | Mad995  |          |          |       |      |          |        | L-ascorbate                                   | Organic acids                | 9.26E+05 | 6.50E+05 | 5.09E+05 | 8.52E+05 |
| Quinates                     | Mad283  | Positive | 355.095  | 355.1 | 2.69 | 354.0951 | [M+H]+ | Chlorogenic acid (3-O-Caffeoylquinic acid)    | Quinate and its derivatives  | 2.69E+07 | 3.79E+07 | 3.53E+07 | 3.52E+07 |
|                              | Mad401  | Positive | 369.111  | 163   | 3.52 | 368.111  | [M+H]+ | Chlorogenic acid methyl ester                 | Quinate and its derivatives  | 5.11E+06 | 1.80E+05 | 8.38E+04 | 5.46E+04 |
|                              | Mad1032 | Negative | 353      | 191.1 | 2.53 | 354.095  | [M-H]- | Neochlorogenic acid (5-O-Caffeoylquinic acid) | Quinate and its derivatives  | 1.33E+07 | 1.61E+07 | 1.81E+07 | 1.67E+07 |
|                              | Mad902  | Negative | 191      | 85    | 1.22 | 192.063  | [M-H]- | Quinic acid                                   | Quinate and its derivatives  | 2.65E+07 | 2.20E+07 | 1.80E+07 | 1.45E+07 |
| Benzoic acids                | Mad1215 | Negative | 121.0368 | 77    | 4.37 | 122.0368 | [M-H]- | Benzoic acid                                  | Benzoic acid derivatives     | 2.02E+05 | 1.64E+05 | 2.79E+05 | 1.29E+05 |
|                              | Mad962  | Negative | 169.022  | 122.8 | 1.81 | 170.022  | [M-H]- | Gallic acid                                   | Benzoic acid derivatives     | 1.39E+05 | 7.61E+03 | 9.00E+00 | 9.00E+00 |
| Hydroxycinnamoyl derivatives | Mad1080 | Negative | 179.042  | 135.1 | 3.14 | 180.0423 | [M-H]- | Caffeic acid                                  | Hydroxycinnamoyl derivatives | 3.01E+06 | 9.94E+04 | 4.28E+04 | 3.51E+04 |
|                              | Mad1170 | Negative | 193.058  | 134.1 | 3.92 | 194.0579 | [M-H]- | Ferulic acid                                  | Hydroxycinnamoyl derivatives | 1.40E+05 | 2.33E+04 | 7.27E+03 | 9.00E+00 |
|                              | Mad1137 | Negative | 163.047  | 119   | 3.71 | 164.047  | [M-H]- | p-Coumaric acid                               | Hydroxycinnamoyl derivatives | 3.99E+06 | 1.12E+05 | 3.31E+04 | 2.35E+04 |
|                              | Mad351  | Positive | 169.042  | 111   | 3.19 | 168.042  | [M+H]+ | Vanillic acid                                 | Hydroxycinnamoyl derivatives | 7.67E+04 | 2.13E+04 | 1.45E+04 | 1.52E+04 |
|                              | Mad388  | Positive | 209.2    | 194.1 | 3.45 | 208.037  | [M+H]+ | 6-Methoxy-7,8-DihydroxyCoumarin               | Coumarins                    | 9.00E+00 | 3.65E+04 | 5.38E+04 | 4.69E+04 |
| Phenolamides                 | Mad2    | Positive | 146.2    | 72.1  | 0.56 | 145.2    | [M+H]+ | Spermidine                                    | Phenolamides                 | 2.58E+06 | 2.32E+05 | 2.09E+05 | 1.35E+05 |
|                              | Mad1    | Positive | 203      | 112   | 0.54 | 202      | [M+H]+ | Spermine                                      | Phenolamides                 | 1.00E+07 | 1.01E+07 | 7.44E+06 | 9.90E+06 |
|                              | Mad7    | Positive | 89       | 71.9  | 0.6  | 88.1     | [M+H]+ | Putrescine                                    | Phenolamides                 | 1.24E+06 | 5.57E+05 | 3.08E+05 | 8.48E+05 |
| Alkaloids                    | Mad80   | Positive | 118.1    | 118.1 | 0.81 | 117.079  | [M+H]+ | Betaine                                       | Alkaloids                    | 6.60E+05 | 1.38E+05 | 1.11E+05 | 2.57E+05 |
|                              | Mad221  | Positive | 181      | 67    | 2.25 | 180      | [M+H]+ | Theobromine                                   | Alkaloids                    | 3.18E+04 | 7.75E+03 | 3.87E+03 | 8.00E+03 |

|                      |         |          |         |       |      |          |                    |                                     |                            |          |          |          |          |
|----------------------|---------|----------|---------|-------|------|----------|--------------------|-------------------------------------|----------------------------|----------|----------|----------|----------|
| Cholines             | Mad72   | Positive | 138     | 137.9 | 0.8  | 137.048  | [M+H] <sup>+</sup> | Trigonelline                        | Alkaloids                  | 6.80E+06 | 1.40E+06 | 3.69E+05 | 1.97E+06 |
|                      | Mad59   | Positive | 104.1   | 60.2  | 0.78 | 103.1    | [M+H] <sup>+</sup> | Choline                             | Cholines                   | 8.84E+06 | 1.64E+06 | 1.19E+06 | 1.90E+06 |
|                      | Mad52   | Positive | 147.12  | 88    | 0.77 | 146.1181 | [M+H] <sup>+</sup> | Acetylcholine                       | Cholines                   | 5.20E+05 | 3.09E+05 | 3.06E+05 | 2.80E+05 |
| Phytohormones        | Mad108  | Positive | 124     | 78    | 1.19 | 123      | [M+H] <sup>+</sup> | Nicotinic acid                      | Nicotinic acid derivatives | 1.20E+05 | 2.33E+05 | 1.46E+04 | 5.64E+03 |
|                      | Mad170  | Positive | 348.1   | 187.7 | 1.6  | 347.1    | [M+H] <sup>+</sup> | Kinetin 9-riboside                  | Phytohormones              | 2.15E+05 | 3.22E+05 | 3.10E+05 | 4.09E+05 |
|                      | Mad566  | Positive | 176.1   | 130.1 | 4.56 | 175.063  | [M+H] <sup>+</sup> | Indole 3-acetic acid (IAA)          | Phytohormones              | 7.05E+03 | 8.05E+03 | 7.67E+03 | 7.68E+03 |
| Flavone              | Mad1290 | Negative | 209     | 58.7  | 5.64 | 210.126  | [M-H] <sup>-</sup> | (+)-Jasmonic acid (JA)              | Phytohormones              | 5.53E+05 | 2.76E+04 | 9.24E+03 | 1.07E+04 |
|                      | Mad1252 | Negative | 263     | 153.2 | 4.93 | 264.136  | [M-H] <sup>-</sup> | (+)-cis,trans-Abscisic acid (ABA)   | Phytohormones              | 1.58E+05 | 2.02E+05 | 5.10E+05 | 2.88E+05 |
|                      | Mad486  | Positive | 463.123 | 313.9 | 3.96 | 462.123  | [M+H] <sup>+</sup> | Chrysoeriol 5-O-hexoside            | Flavone                    | 4.00E+05 | 9.67E+04 | 7.10E+04 | 9.08E+04 |
|                      | Mad577  | Positive | 417.2   | 255.8 | 4.67 | 416.2    | [M+H] <sup>+</sup> | Chrysin O-hexoside                  | Flavone                    | 1.97E+05 | 9.35E+04 | 4.37E+04 | 5.31E+04 |
|                      | Mad632  | Positive | 331.1   | 315.8 | 5.58 | 330.1    | [M+H] <sup>+</sup> | Tricin                              | Flavone                    | 1.60E+04 | 1.76E+04 | 5.01E+03 | 8.34E+03 |
|                      | Mad456  | Positive | 509.2   | 347.6 | 3.82 | 508.2    | [M+H] <sup>+</sup> | Syringetin 5-O-hexoside             | Flavone                    | 9.00E+00 | 2.04E+04 | 5.00E+04 | 1.57E+05 |
|                      | Mad593  | Positive | 417.1   | 255.7 | 4.84 | 416.1    | [M+H] <sup>+</sup> | Chrysin 5-O-glucoside (Toringin)    | Flavone                    | 3.93E+04 | 3.74E+04 | 2.94E+04 | 2.50E+04 |
|                      | Mad493  | Positive | 509.3   | 283.6 | 4.02 | 508.3    | [M+H] <sup>+</sup> | Syringetin 7-O-hexoside             | Flavone                    | 1.45E+03 | 1.53E+04 | 3.90E+04 | 1.27E+05 |
|                      | Mad517  | Positive | 463.2   | 287.7 | 4.14 | 462.2    | [M+H] <sup>+</sup> | Chrysoeriol 7-O-hexoside            | Flavone                    | 3.89E+05 | 9.07E+04 | 7.54E+04 | 9.05E+04 |
|                      | Mad1168 | Negative | 491.1   | 329.3 | 3.9  | 492.1    | [M-H] <sup>-</sup> | Tricin 5-O-hexoside                 | Flavone                    | 9.00E+00 | 5.51E+04 | 1.00E+05 | 1.80E+05 |
| Flavone C-glycosides | Mad1198 | Negative | 491.1   | 431.2 | 4.14 | 492.1    | [M-H] <sup>-</sup> | Tricin 7-O-hexoside                 | Flavone                    | 7.85E+05 | 3.32E+05 | 1.01E+05 | 7.89E+04 |
|                      | Mad1249 | Negative | 285     | 133.1 | 4.91 | 286      | [M-H] <sup>-</sup> | Luteolin                            | Flavone                    | 6.95E+04 | 9.00E+00 | 9.00E+00 | 9.00E+00 |
|                      | Mad688  | Positive | 255.058 | 69.7  | 6.73 | 254.0579 | [M+H] <sup>+</sup> | Chrysin                             | Flavone                    | 9.59E+03 | 9.00E+00 | 9.00E+00 | 9.00E+00 |
|                      | Mad631  | Positive | 301.063 | 286.1 | 5.56 | 300.0634 | [M+H] <sup>+</sup> | Chrysoeriol                         | Flavone                    | 9.17E+03 | 9.00E+00 | 9.00E+00 | 9.00E+00 |
|                      | Mad709  | Positive | 373.121 | 373.1 | 7.32 | 372.121  | [M+H] <sup>+</sup> | Tangeretin                          | Flavone                    | 6.11E+04 | 6.66E+04 | 6.90E+04 | 5.65E+04 |
|                      | Mad1136 | Negative | 447.3   | 285.1 | 3.7  | 448.101  | [M-H] <sup>-</sup> | Luteolin 7-O-glucoside (Cynaroside) | Flavone                    | 2.71E+06 | 3.48E+05 | 2.86E+05 | 2.68E+05 |
|                      | Mad626  | Positive | 273.07  | 153.1 | 5.45 | 272.069  | [M+H] <sup>+</sup> | Butin                               | Flavone                    | 7.12E+05 | 9.00E+00 | 9.00E+00 | 9.00E+00 |
|                      | Mad391  | Positive | 449.1   | 300   | 3.47 | 448.1    | [M+H] <sup>+</sup> | Luteolin 6-C-glucoside              | Flavone C-glycosides       | 2.04E+04 | 2.77E+04 | 1.30E+04 | 1.69E+04 |
|                      | Mad278  | Positive | 627.1   | 430   | 2.65 | 626.1    | [M+H] <sup>+</sup> | 8-C-hexosyl-hesperetin O-hexoside   | Flavone C-glycosides       | 5.76E+04 | 1.61E+04 | 1.51E+04 | 4.24E+04 |

|           |         |          |         |       |      |          |                    |                                                    |                      |          |          |          |          |
|-----------|---------|----------|---------|-------|------|----------|--------------------|----------------------------------------------------|----------------------|----------|----------|----------|----------|
| Flavonol  | Mad370  | Positive | 627.1   | 447.3 | 3.33 | 626.1    | [M+H] <sup>+</sup> | 6-C-hexosyl-hesperetin O-hexoside                  | Flavone C-glycosides | 9.04E+03 | 9.40E+04 | 1.27E+05 | 1.58E+05 |
|           | Mad1156 | Negative | 739.2   | 740   | 3.85 | 740.2    | [M-H] <sup>-</sup> | Chrysoeriol 8-C-pentosyl-O-rutinoside              | Flavone C-glycosides | 6.58E+03 | 1.98E+04 | 2.34E+04 | 2.13E+04 |
|           | Mad1088 | Negative | 449.1   | 329.3 | 3.21 | 450.1    | [M-H] <sup>-</sup> | Eriodictyol C-hexoside                             | Flavone C-glycosides | 2.47E+06 | 6.55E+05 | 4.20E+05 | 4.43E+05 |
|           | Mad1097 | Negative | 447.1   | 327.3 | 3.32 | 448.1    | [M-H] <sup>-</sup> | Luteolin C-hexoside                                | Flavone C-glycosides | 2.48E+04 | 4.98E+04 | 2.30E+04 | 2.91E+04 |
|           | Mad386  | Positive | 713.1   | 303.6 | 3.41 | 712.1    | [M+H] <sup>+</sup> | Quercetin 7-O-malonylhexosyl-hexoside              | Flavonol             | 1.89E+04 | 4.69E+03 | 1.96E+03 | 3.86E+04 |
|           | Mad443  | Positive | 611.2   | 303.7 | 3.73 | 610.2    | [M+H] <sup>+</sup> | Quercetin 7-O-rutinoside                           | Flavonol             | 2.62E+06 | 1.62E+06 | 1.32E+06 | 5.61E+06 |
|           | Mad1115 | Negative | 609.153 | 609.1 | 3.51 | 610.153  | [M-H] <sup>-</sup> | Quercetin 3-O-rutinoside (Rutin)                   | Flavonol             | 3.01E+06 | 1.66E+06 | 1.33E+06 | 6.64E+06 |
|           | Mad1251 | Negative | 301.043 | 151.1 | 4.92 | 302.043  | [M-H] <sup>-</sup> | Quercetin                                          | Flavonol             | 1.11E+07 | 1.59E+05 | 3.51E+04 | 5.35E+04 |
|           | Mad629  | Positive | 287.048 | 287   | 5.52 | 286.048  | [M+H] <sup>+</sup> | Kaempferol                                         | Flavonol             | 4.14E+04 | 9.00E+00 | 9.00E+00 | 9.00E+00 |
|           | Mad1147 | Negative | 593.159 | 285.1 | 3.77 | 594.1585 | [M-H] <sup>-</sup> | Kaempferol 3-O-rutinoside (Nicotiflorin)           | Flavonol             | 2.30E+05 | 7.14E+04 | 5.00E+04 | 1.76E+05 |
|           | Mad1218 | Negative | 317     | 179   | 4.39 | 318.038  | [M-H] <sup>-</sup> | Myricetin                                          | Flavonol             | 2.09E+04 | 6.51E+03 | 5.64E+03 | 4.60E+03 |
|           | Mad1184 | Negative | 447.101 | 287.1 | 4.03 | 448.101  | [M-H] <sup>-</sup> | Kaempferol 3-O-glucoside (Astragalin)              | Flavonol             | 4.27E+05 | 2.27E+05 | 1.38E+05 | 2.27E+05 |
|           | Mad1220 | Negative | 287.06  | 125.1 | 4.43 | 288.063  | [M-H] <sup>-</sup> | Aromadetrin (Dihydrokaempferol)                    | Flavonol             | 2.74E+05 | 9.00E+00 | 9.00E+00 | 9.00E+00 |
|           | Mad1185 | Negative | 463     | 301   | 4.03 | 464.096  | [M-H] <sup>-</sup> | Quercetin 4'-O-glucoside (Spiraeoside)             | Flavonol             | 3.91E+07 | 3.57E+07 | 2.60E+07 | 2.91E+07 |
|           | Mad432  | Positive | 465     | 302.8 | 3.68 | 464.096  | [M+H] <sup>+</sup> | Quercetin 3-O-glucoside (Isotrifoliin)             | Flavonol             | 4.94E+07 | 4.64E+07 | 4.17E+07 | 4.24E+07 |
|           | Mad465  | Positive | 449     | 286.9 | 3.86 | 448.101  | [M+H] <sup>+</sup> | Kaempferol 3-O-galactoside (Trifolin)              | Flavonol             | 5.56E+06 | 1.26E+06 | 5.55E+05 | 1.20E+06 |
|           | Mad1208 | Negative | 431     | 285.1 | 4.29 | 432.106  | [M-H] <sup>-</sup> | Kaempferol 3-O-rhamnoside (Kaempferin)             | Flavonol             | 7.22E+06 | 1.60E+06 | 7.86E+05 | 1.15E+06 |
|           | Mad363  | Positive | 741.22  | 433.2 | 3.28 | 740.216  | [M+H] <sup>+</sup> | Kaempferol-3-O-robinoside-7-O-rhamnoside (Robinin) | Flavonol             | 9.00E+00 | 4.94E+04 | 6.00E+04 | 7.22E+04 |
| Flavanone | Mad508  | Positive | 611.2   | 303.1 | 4.09 | 610.19   | [M+H] <sup>+</sup> | Hesperetin 7-O-neohesperidoside (Neohesperidin)    | Flavanone            | 3.96E+05 | 1.24E+05 | 8.95E+04 | 1.45E+05 |
|           | Mad481  | Positive | 581.179 | 57.1  | 3.92 | 580.1792 | [M+H] <sup>+</sup> | Naringenin 7-O-neohesperidoside (Naringin)         | Flavanone            | 6.61E+04 | 2.89E+04 | 2.01E+04 | 2.26E+04 |
|           | Mad1187 | Negative | 433.121 | 122.9 | 4.05 | 434.1213 | [M-H] <sup>-</sup> | Naringenin 7-O-glucoside (Prunin)                  | Flavanone            | 9.04E+06 | 3.64E+06 | 1.53E+06 | 2.04E+06 |
|           | Mad624  | Positive | 273.069 | 153.1 | 5.41 | 272.0685 | [M+H] <sup>+</sup> | Naringenin                                         | Flavanone            | 7.00E+05 | 9.00E+00 | 9.00E+00 | 4.27E+03 |
|           | Mad623  | Positive | 275.084 | 107   | 5.34 | 274.0841 | [M+H] <sup>+</sup> | Phloretin                                          | Flavanone            | 1.40E+06 | 1.99E+04 | 7.82E+03 | 9.40E+03 |
|           | Mad595  | Positive | 289.063 | 153.1 | 4.85 | 288.063  | [M+H] <sup>+</sup> | Eriodictyol                                        | Flavanone            | 1.37E+05 | 9.00E+00 | 9.00E+00 | 9.00E+00 |
|           | Mad1165 | Negative | 463.132 | 301.1 | 3.88 | 464.132  | [M-H] <sup>-</sup> | Hesperetin 5-O-glucoside                           | Flavanone            | 7.60E+07 | 6.51E+07 | 5.49E+07 | 6.02E+07 |

|                                  |          |          |         |       |         |                    |                         |                                              |                      |          |          |          |          |
|----------------------------------|----------|----------|---------|-------|---------|--------------------|-------------------------|----------------------------------------------|----------------------|----------|----------|----------|----------|
| Proanthocyanidins & Anthocyanins | Mad490   | Positive | 611.19  | 303   | 3.99    | 610.19             | [M+H] <sup>+</sup>      | Hesperetin 7-rutinoside (Hesperidin)         | Flavanone            | 4.66E+05 | 1.48E+05 | 9.18E+04 | 1.72E+05 |
|                                  | Mad1268  | Negative | 271.07  | 151.1 | 5.3     | 272.069            | [M-H] <sup>-</sup>      | Naringenin chalcone                          | Flavanone            | 7.30E+05 | 3.02E+03 | 9.00E+00 | 7.92E+03 |
|                                  | Mad1246  | Negative | 593     | 285.2 | 4.85    | 594.195            | [M-H] <sup>-</sup>      | Isosakuranetin-7-neohesperidoside (Poncirin) | Flavanone            | 3.94E+06 | 1.86E+05 | 2.05E+04 | 3.20E+04 |
|                                  | Mad1133  | Negative | 575     | 285.3 | 3.69    | 576.1268           | [M-H] <sup>-</sup>      | Procyanidin A1                               | Proanthocyanidins    | 2.75E+05 | 9.00E+00 | 9.00E+00 | 9.00E+00 |
|                                  | Mad1175  | Negative | 575     | 285.3 | 3.94    | 576.1268           | [M-H] <sup>-</sup>      | Procyanidin A2                               | Proanthocyanidins    | 9.00E+00 | 7.99E+04 | 5.22E+04 | 7.82E+04 |
|                                  | Mad1076  | Negative | 577     | 407.3 | 3.08    | 578.1424           | [M-H] <sup>-</sup>      | Procyanidin B2                               | Proanthocyanidins    | 4.63E+07 | 4.11E+07 | 3.44E+07 | 3.47E+07 |
|                                  | Mad1058  | Negative | 577.1   | 407.3 | 2.87    | 578.1424           | [M-H] <sup>-</sup>      | Procyanidin B3                               | Proanthocyanidins    | 4.35E+07 | 3.89E+07 | 3.20E+07 | 3.25E+07 |
| Catechin derivatives             | Mad356   | Positive | 477.1   | 315.6 | 3.22    | 477.1              | Protonated              | Rosinidin O-hexoside                         | Anthocyanins         | 3.77E+04 | 4.36E+03 | 9.00E+00 | 9.00E+00 |
|                                  | Mad248   | Positive | 449.1   | 287.3 | 2.45    | 449.1              | Protonated              | Cyanidin 3-O-glucoside (Kuromanin)           | Anthocyanins         | 2.96E+07 | 1.86E+05 | 7.15E+05 | 3.72E+07 |
|                                  | Mad1017  | Negative | 465.1   | 285.3 | 2.41    | 466.1              | [M-H] <sup>-</sup>      | Cyanidin O-syringic acid                     | Anthocyanins         | 3.73E+06 | 1.85E+04 | 1.35E+05 | 1.16E+07 |
|                                  | Mad1111  | Negative | 865.1   | 407.2 | 3.46    | 866.1              | [M-H] <sup>-</sup>      | Catechin-catechin-catechin                   | Catechin derivatives | 8.68E+06 | 9.27E+05 | 3.08E+05 | 4.15E+05 |
|                                  | Mad1116  | Negative | 561.1   | 271.3 | 3.55    | 562.1              | [M-H] <sup>-</sup>      | Epicatechin-epiafzelechin                    | Catechin derivatives | 1.13E+06 | 1.23E+06 | 8.25E+05 | 9.32E+05 |
|                                  | Mad1054  | Negative | 289.079 | 125   | 2.81    | 290.079            | [M-H] <sup>-</sup>      | Catechin                                     | Catechin derivatives | 5.07E+07 | 8.51E+06 | 4.37E+06 | 5.11E+06 |
|                                  | Mad1082  | Negative | 289     | 78.8  | 3.17    | 290.3              | [M-H] <sup>-</sup>      | L-Epicatechin                                | Catechin derivatives | 6.15E+07 | 4.24E+07 | 3.06E+07 | 3.01E+07 |
| Mad277                           | Positive | 307      | 139.1   | 2.64  | 306     | [M+H] <sup>+</sup> | Epigallocatechin (EGC)  | Catechin derivatives                         | 7.46E+05             | 4.50E+05 | 2.40E+05 | 5.06E+05 |          |
| Mad1015                          | Negative | 305      | 125     | 2.36  | 306.074 | [M-H] <sup>-</sup> | (+)-Gallocatechin (GC)  | Catechin derivatives                         | 1.13E+05             | 1.25E+04 | 2.06E+04 | 2.57E+04 |          |
| Mad1034                          | Negative | 153.1    | 109.1   | 2.55  | 154.027 | [M-H] <sup>-</sup> | Protocatechuic acid     | Catechin derivatives                         | 2.23E+06             | 1.97E+05 | 1.40E+05 | 2.10E+05 |          |
| Mad1071                          | Negative | 137.1    | 137     | 2.99  | 138.032 | [M-H] <sup>-</sup> | Protocatechuic aldehyde | Catechin derivatives                         | 1.02E+05             | 1.98E+04 | 1.69E+04 | 2.10E+04 |          |

**Table 3.** Differentially accumulated metabolites among PS1 vs PS2, PS2 vs PS3, and PS3 vs PS4, respectively.

| Index              | Compounds                         | Class                | Sample 1 |          |          | Sample 2 |          |          | VIP     | Fold_Change | LogFC   | type |
|--------------------|-----------------------------------|----------------------|----------|----------|----------|----------|----------|----------|---------|-------------|---------|------|
|                    |                                   |                      | PS1a     | PS1b     | PS1c     | PS2a     | PS2b     | PS2c     |         |             |         |      |
| <b>PS1 vs PS2:</b> |                                   |                      |          |          |          |          |          |          |         |             |         |      |
| Mad456             | Syringetin 5-O-hexoside           | Flavone              | 9.00E+00 | 9.00E+00 | 9.00E+00 | 1.64E+00 | 1.26E+00 | 3.21E+00 | 2.07758 | 2262.963    | 11.144  | up   |
| Mad493             | Syringetin 7-O-hexoside           | Flavone              | 9.00E+00 | 9.00E+00 | 4.32E+00 | 1.72E+00 | 1.00E+00 | 1.88E+00 | 1.54566 | 10.60396    | 3.40653 | up   |
| Mad370             | 6-C-hexosyl-hesperetin O-hexoside | Flavone C-glycosides | 1.18E+04 | 9.51E+03 | 5.82E+03 | 1.45E+05 | 7.71E+04 | 5.99E+04 | 1.12152 | 10.3944     | 3.37773 | up   |

|             |                                                        |                                 |              |              |              |              |              |              |              |          |              |          |
|-------------|--------------------------------------------------------|---------------------------------|--------------|--------------|--------------|--------------|--------------|--------------|--------------|----------|--------------|----------|
| Mad424      | Luteolin 8-C-hexosyl-O-hexoside                        | Flavone C-glycosides            | 2.09E+0<br>4 | 9.00E+0<br>0 | 1.44E+0<br>4 | 5.62E+0<br>4 | 4.04E+0<br>4 | 6.24E+0<br>4 | 1.09370<br>3 | 4.503101 | 2.17091<br>9 | up       |
| Mad331      | O-Feruloyl 2-hydroxycoumarin                           | Coumarins                       | 1.20E+0<br>4 | 1.42E+0<br>4 | 1.37E+0<br>4 | 1.18E+0<br>5 | 1.04E+0<br>5 | 1.03E+0<br>5 | 1.08883<br>2 | 8.145363 | 3.02597<br>9 | up       |
| Mad788      | 4-Hydroxy-3-methoxymandelate                           | Organic acids                   | 9.00E+0<br>0 | 4.94E+0<br>3 | 9.00E+0<br>0 | 1.23E+0<br>4 | 1.58E+0<br>4 | 1.70E+0<br>4 | 1.53425<br>1 | 9.09641  | 3.18529<br>7 | up       |
| Mad115<br>1 | Acetyl tryptophan                                      | Amino acid derivatives          | 5.53E+0<br>5 | 3.70E+0<br>5 | 3.35E+0<br>5 | 5.94E+0<br>6 | 1.02E+0<br>7 | 8.27E+0<br>6 | 1.28930<br>2 | 19.40382 | 4.27826<br>8 | up       |
| Mad825      | Anthranilate O-hexosyl-O-hexoside                      | Benzoic acid derivatives        | 1.68E+0<br>4 | 1.48E+0<br>4 | 1.50E+0<br>4 | 7.50E+0<br>4 | 1.42E+0<br>5 | 1.22E+0<br>5 | 1.04089<br>6 | 7.274678 | 2.86288<br>3 | up       |
| Mad116<br>8 | Tricin 5-O-hexoside                                    | Flavone                         | 9.00E+0<br>0 | 9.00E+0<br>0 | 9.00E+0<br>0 | 4.20E+0<br>4 | 2.78E+0<br>4 | 9.54E+0<br>4 | 2.20062<br>4 | 6118.519 | 12.5789<br>7 | up       |
| Mad28       | 2'-Deoxyinosine-5'-monophosphate                       | Nucleotide and its<br>derivates | 1.44E+0<br>5 | 1.77E+0<br>5 | 2.05E+0<br>5 | 1.18E+0<br>7 | 9.82E+0<br>6 | 6.99E+0<br>6 | 1.4988       | 54.39163 | 5.76531<br>3 | up       |
| Mad567      | Ethyl 3,4-Dihydroxybenzoate (Ethyl<br>protocatechuate) | Organic acids                   | 9.00E+0<br>0 | 9.00E+0<br>0 | 9.00E+0<br>0 | 8.65E+0<br>4 | 1.23E+0<br>5 | 1.45E+0<br>5 | 2.31398<br>7 | 13129.63 | 13.6805<br>4 | up       |
| Mad117<br>5 | Procyanidin A2                                         | Proanthocyanidins               | 9.00E+0<br>0 | 9.00E+0<br>0 | 9.00E+0<br>0 | 9.98E+0<br>4 | 6.26E+0<br>4 | 7.74E+0<br>4 | 2.26627<br>8 | 8881.481 | 13.1165<br>8 | up       |
| Mad828      | D-(+)-Sucrose                                          | Carbohydrates                   | 1.15E+0<br>6 | 7.58E+0<br>5 | 1.03E+0<br>6 | 8.94E+0<br>6 | 1.08E+0<br>7 | 8.06E+0<br>6 | 1.12527<br>7 | 9.462219 | 3.24217<br>9 | up       |
| Mad51       | D(+)-Melezitose                                        | Carbohydrates                   | 2.62E+0<br>4 | 2.08E+0<br>4 | 1.74E+0<br>4 | 2.72E+0<br>5 | 2.00E+0<br>5 | 1.69E+0<br>5 | 1.13255<br>3 | 9.953416 | 3.31519<br>2 | up       |
| Mad105      | L-Methionine                                           | Amino acids                     | 4.96E+0<br>5 | 6.17E+0<br>5 | 2.91E+0<br>5 | 3.88E+0<br>6 | 4.14E+0<br>6 | 5.60E+0<br>6 | 1.12976<br>1 | 9.700855 | 3.27811<br>2 | up       |
| Mad137      | Pyridoxine 5'-phosphate                                | Vitamins                        | 7.78E+0<br>3 | 9.00E+0<br>0 | 3.32E+0<br>3 | 1.28E+0<br>4 | 1.93E+0<br>4 | 1.71E+0<br>4 | 1.06268<br>9 | 4.428841 | 2.14692<br>9 | up       |
| Mad102<br>9 | N-Acetyl-L-tyrosine                                    | Amino acid derivatives          | 9.00E+0<br>0 | 9.00E+0<br>0 | 9.00E+0<br>0 | 4.71E+0<br>4 | 4.68E+0<br>4 | 5.77E+0<br>4 | 2.21032<br>6 | 5614.815 | 12.4550<br>2 | up       |
| Mad850      | 1,5-Anhydro-D-glucitol                                 | Alcohols and polyols            | 9.00E+0<br>0 | 9.00E+0<br>0 | 9.00E+0<br>0 | 7.06E+0<br>4 | 7.99E+0<br>4 | 7.22E+0<br>4 | 2.25965<br>3 | 8248.148 | 13.0098<br>5 | up       |
| Mad45       | 1-Methyladenine                                        | Nucleotide and its<br>derivates | 2.14E+0<br>4 | 1.85E+0<br>4 | 8.95E+0<br>3 | 7.38E+0<br>4 | 1.12E+0<br>5 | 1.36E+0<br>5 | 1.01529      | 6.587513 | 2.71973<br>4 | up       |
| Mad778      | trans,trans-Muconic acid                               | Organic acids                   | 9.00E+0<br>0 | 9.00E+0<br>0 | 9.00E+0<br>0 | 3.99E+0<br>5 | 4.06E+0<br>5 | 4.55E+0<br>5 | 2.46720<br>6 | 46666.67 | 15.5101      | up       |
| Mad110<br>3 | Glycitin                                               | Isoflavone                      | 2.25E+0<br>4 | 3.28E+0<br>4 | 9.00E+0<br>0 | 2.62E+0<br>5 | 3.29E+0<br>5 | 2.50E+0<br>5 | 1.39221<br>3 | 15.20548 | 3.92652      | up       |
| Mad347      | Esculetin (6,7-dihydroxycoumarin)                      | Coumarins                       | 9.00E+0<br>0 | 9.00E+0<br>0 | 9.00E+0<br>0 | 1.00E+0<br>5 | 9.21E+0<br>4 | 7.04E+0<br>4 | 2.27877<br>2 | 9722.222 | 13.2470<br>7 | up       |
| Mad388      | 6-Methoxy-7,8-DihydroxyCoumarin                        | Coumarins                       | 9.00E+0<br>0 | 9.00E+0<br>0 | 9.00E+0<br>0 | 3.11E+0<br>4 | 5.03E+0<br>4 | 2.81E+0<br>4 | 2.16381<br>1 | 4055.556 | 11.9856<br>8 | up       |
| Mad363      | Kaempferol-3-O-robinoside-7-O-rhamnoside<br>(Robinin)  | Flavonol                        | 9.00E+0<br>0 | 9.00E+0<br>0 | 9.00E+0<br>0 | 5.73E+0<br>4 | 3.93E+0<br>4 | 5.17E+0<br>4 | 2.20629<br>6 | 5492.593 | 12.4232<br>7 | up       |
| Mad110<br>4 | Myricetin 3-O-galactoside                              | Flavonol                        | 5.64E+0<br>4 | 9.10E+0<br>4 | 9.00E+0<br>0 | 5.00E+0<br>4 | 1.94E+0<br>5 | 3.65E+0<br>5 | 1.05604<br>6 | 4.131362 | 2.04661<br>8 | up       |
| Mad739      | 14,15-Dehydrocrepenynic acid                           | Lipids_Fatty acids              | 1.19E+0<br>5 | 1.63E+0<br>5 | 7.56E+0<br>4 | 1.27E+0<br>4 | 1.11E+0<br>4 | 1.12E+0<br>4 | 1.12460<br>9 | 0.097875 | -<br>3.35292 | dow<br>n |
| Mad390      | 1-O-Feruloyl quinic acid                               | Quinate and its derivatives     | 8.33E+0<br>5 | 1.32E+0<br>6 | 9.18E+0<br>5 | 6.12E+0<br>4 | 3.25E+0<br>4 | 7.47E+0<br>4 | 1.27904<br>2 | 0.054836 | -<br>4.18874 | dow<br>n |
| Mad108<br>4 | 5-O-p-Coumaroylquinic acid                             | Quinate and its derivatives     | 8.12E+0<br>6 | 1.03E+0<br>7 | 1.13E+0<br>7 | 8.61E+0<br>5 | 7.74E+0<br>5 | 8.66E+0<br>5 | 1.18010<br>7 | 0.084152 | -<br>3.57086 | dow<br>n |



|             |                                                            |                                 |              |              |              |              |              |              |              |          |         |          |
|-------------|------------------------------------------------------------|---------------------------------|--------------|--------------|--------------|--------------|--------------|--------------|--------------|----------|---------|----------|
| Mad122<br>5 | E-3,4,5'-Trihydroxy-3'-glucopyranosylstilbene              | Others                          | 6.87E+0<br>4 | 1.52E+0<br>5 | 8.21E+0<br>4 | 5.19E+0<br>3 | 9.00E+0<br>0 | 9.00E+0<br>0 | 1.86407<br>3 | 0.017199 | -       | dow<br>n |
| Mad97       | Xanthine                                                   | Nucleotide and its<br>derivates | 8.34E+0<br>4 | 8.93E+0<br>4 | 8.54E+0<br>4 | 5.12E+0<br>3 | 5.20E+0<br>3 | 9.00E+0<br>0 | 1.45357      | 0.040019 | -       | dow<br>n |
| Mad2        | Spermidine                                                 | Phenolamides                    | 2.52E+0<br>6 | 2.43E+0<br>6 | 2.79E+0<br>6 | 1.52E+0<br>5 | 2.48E+0<br>5 | 2.97E+0<br>5 | 1.16839<br>4 | 0.090052 | -3.4731 | dow<br>n |
| Mad240      | N',N''',N''''-p-coumaroyl-cinnamoyl-caffeoyl<br>spermidine | Phenolamides                    | 9.11E+0<br>3 | 1.44E+0<br>4 | 6.14E+0<br>3 | 2.52E+0<br>3 | 9.00E+0<br>0 | 9.00E+0<br>0 | 1.51497<br>8 | 0.085599 | -       | dow<br>n |
| Mad228      | N'-p-Coumaroyl putrescine                                  | Phenolamides                    | 4.86E+0<br>4 | 5.24E+0<br>4 | 6.51E+0<br>4 | 9.00E+0<br>0 | 9.00E+0<br>0 | 9.00E+0<br>0 | 2.22166<br>3 | 0.000163 | -       | dow<br>n |
| Mad356      | Rosinidin O-hexoside                                       | Anthocyanins                    | 5.28E+0<br>4 | 2.84E+0<br>4 | 3.20E+0<br>4 | 7.17E+0<br>3 | 9.00E+0<br>0 | 5.89E+0<br>3 | 1.21537      | 0.115451 | -       | dow<br>n |
| Mad248      | Cyanidin 3-O-glucoside (Kuromanin)                         | Anthocyanins                    | 2.90E+0<br>7 | 3.25E+0<br>7 | 2.72E+0<br>7 | 3.77E+0<br>5 | 9.62E+0<br>4 | 8.40E+0<br>4 | 1.72089<br>8 | 0.006282 | -7.3146 | dow<br>n |
| Mad430      | 5-O-p-Coumaroyl shikimic acid                              | Quinate and its derivatives     | 2.14E+0<br>5 | 2.34E+0<br>5 | 1.43E+0<br>5 | 2.86E+0<br>4 | 7.97E+0<br>3 | 2.19E+0<br>4 | 1.13923<br>7 | 0.098934 | -       | dow<br>n |
| Mad163      | Niacinamide                                                | Vitamins                        | 3.94E+0<br>5 | 3.25E+0<br>5 | 4.31E+0<br>5 | 7.06E+0<br>4 | 5.03E+0<br>4 | 6.72E+0<br>4 | 1.00837<br>7 | 0.163565 | -       | dow<br>n |
| Mad715      | LysoPE 14:0                                                | Lipids_Glycerophospholip<br>ids | 7.70E+0<br>3 | 8.98E+0<br>3 | 7.20E+0<br>3 | 9.00E+0<br>0 | 1.91E+0<br>3 | 9.00E+0<br>0 | 1.51509<br>7 | 0.080737 | -       | dow<br>n |
| Mad420      | Phellodensin F                                             | Others                          | 1.87E+0<br>4 | 3.32E+0<br>4 | 1.85E+0<br>4 | 9.00E+0<br>0 | 9.00E+0<br>0 | 9.00E+0<br>0 | 2.10411      | 0.000384 | -       | dow<br>n |
| Mad46       | O-Phosphocholine                                           | Cholines                        | 1.79E+0<br>6 | 1.90E+0<br>6 | 2.29E+0<br>6 | 1.21E+0<br>5 | 1.01E+0<br>5 | 1.49E+0<br>5 | 1.25369<br>6 | 0.06204  | -       | dow<br>n |
| Mad718      | LysoPC 15:1                                                | Lipids_Glycerophospholip<br>ids | 1.28E+0<br>4 | 1.48E+0<br>4 | 1.31E+0<br>4 | 4.20E+0<br>3 | 3.45E+0<br>3 | 9.00E+0<br>0 | 1.08178      | 0.188182 | -2.4098 | dow<br>n |
| Mad768      | MAG (18:3) isomer1                                         | Lipids_Glycerolipids            | 1.99E+0<br>6 | 2.18E+0<br>6 | 1.06E+0<br>6 | 1.57E+0<br>5 | 1.78E+0<br>5 | 2.25E+0<br>5 | 1.10160<br>6 | 0.107075 | -       | dow<br>n |
| Mad101<br>3 | Syringaldehyde O-glucoside                                 | Others                          | 2.99E+0<br>4 | 3.87E+0<br>4 | 2.71E+0<br>4 | 9.00E+0<br>0 | 9.00E+0<br>0 | 9.00E+0<br>0 | 2.14953<br>4 | 0.000282 | -       | dow<br>n |
| Mad127<br>9 | 3,4-Dimethoxycinnamic acid                                 | Hydroxycinnamoyl<br>derivatives | 7.17E+0<br>4 | 1.19E+0<br>5 | 4.72E+0<br>4 | 9.00E+0<br>0 | 9.00E+0<br>0 | 9.00E+0<br>0 | 2.25715<br>1 | 0.000113 | -       | dow<br>n |
| Mad134<br>7 | 9,10-EODE                                                  | Lipids_Fatty acids              | 3.86E+0<br>5 | 5.38E+0<br>5 | 2.89E+0<br>5 | 6.02E+0<br>4 | 6.14E+0<br>4 | 6.40E+0<br>4 | 1.01266<br>8 | 0.153009 | -       | dow<br>n |
| Mad134<br>9 | 9-KODE                                                     | Lipids_Fatty acids              | 1.11E+0<br>4 | 1.16E+0<br>4 | 7.18E+0<br>3 | 9.00E+0<br>0 | 9.00E+0<br>0 | 9.00E+0<br>0 | 1.98811<br>1 | 0.000904 | -10.112 | dow<br>n |
| Mad133<br>9 | 13-HpOTrE(r)                                               | Lipids_Fatty acids              | 4.80E+0<br>3 | 4.49E+0<br>3 | 1.68E+0<br>3 | 9.00E+0<br>0 | 9.00E+0<br>0 | 9.00E+0<br>0 | 1.82268<br>3 | 0.002461 | -       | dow<br>n |
| Mad127<br>2 | 4-Methoxycinnamic acid                                     | Hydroxycinnamoyl<br>derivatives | 3.58E+0<br>5 | 6.46E+0<br>5 | 2.86E+0<br>5 | 9.00E+0<br>0 | 9.00E+0<br>0 | 9.00E+0<br>0 | 2.46184<br>8 | 2.09E-05 | -       | dow<br>n |
| Mad135<br>2 | 12,13-EODE                                                 | Lipids_Fatty acids              | 5.21E+0<br>3 | 5.42E+0<br>3 | 3.39E+0<br>3 | 9.00E+0<br>0 | 9.00E+0<br>0 | 9.00E+0<br>0 | 1.87728<br>4 | 0.001926 | -       | dow<br>n |
| Mad133<br>8 | 13-HPODE                                                   | Lipids_Fatty acids              | 1.42E+0<br>4 | 2.71E+0<br>4 | 1.36E+0<br>4 | 3.06E+0<br>3 | 2.71E+0<br>3 | 2.44E+0<br>3 | 1.00858<br>2 | 0.149545 | -       | dow<br>n |
| Mad111<br>1 | Catechin-catechin-catechin                                 | Catechin derivatives            | 8.45E+0<br>6 | 9.28E+0<br>6 | 8.30E+0<br>6 | 1.37E+0<br>6 | 6.87E+0<br>5 | 7.24E+0<br>5 | 1.12743<br>9 | 0.106838 | -3.2265 | dow<br>n |
| Mad101<br>7 | Cyanidin O-syringic acid                                   | Anthocyanins                    | 3.78E+0<br>6 | 4.19E+0<br>6 | 3.23E+0<br>6 | 5.54E+0<br>4 | 9.00E+0<br>0 | 9.00E+0<br>0 | 2.21533<br>8 | 0.004948 | -       | dow<br>n |
| Mad116<br>1 | Quercetin O-acetylhexoside                                 | Flavonol                        | 1.97E+0<br>7 | 2.21E+0<br>7 | 2.23E+0<br>7 | 4.47E+0<br>6 | 3.31E+0<br>6 | 2.93E+0<br>6 | 1.00540<br>9 | 0.167083 | -       | dow<br>n |

|         |                                                   |                              |          |          |          |          |          |          |          |          |   |      |
|---------|---------------------------------------------------|------------------------------|----------|----------|----------|----------|----------|----------|----------|----------|---|------|
| Mad1105 | O-p-Coumaroyl quinic acid O-rutinoside derivative | Quinate and its derivatives  | 1.11E+04 | 1.65E+04 | 9.55E+03 | 9.00E+00 | 9.00E+00 | 9.00E+00 | 2.018168 | 0.000727 | - | down |
| Mad1106 | 3-O-p-Coumaroyl quinic acid                       | Quinate and its derivatives  | 3.34E+07 | 4.12E+07 | 3.83E+07 | 6.94E+06 | 4.86E+06 | 2.55E+06 | 1.079914 | 0.127104 | - | down |
| Mad1169 | 3-O-p-Coumaroyl shikimic acid                     | Quinate and its derivatives  | 3.09E+04 | 5.77E+04 | 3.75E+04 | 9.00E+00 | 9.00E+00 | 9.00E+00 | 2.18194  | 0.000214 | - | down |
| Mad1357 | $\alpha$ -Linolenic acid                          | Lipids_Fatty acids           | 8.62E+03 | 9.80E+03 | 4.86E+03 | 9.00E+00 | 9.00E+00 | 9.00E+00 | 1.948129 | 0.00116  | - | down |
| Mad764  | LysoPC 18:0                                       | Lipids_Glycerophospholipids  | 1.05E+06 | 2.07E+06 | 9.78E+05 | 2.34E+05 | 1.95E+05 | 1.74E+05 | 1.009002 | 0.147145 | - | down |
| Mad1249 | Luteolin                                          | Flavone                      | 6.58E+04 | 8.09E+04 | 6.17E+04 | 9.00E+00 | 9.00E+00 | 9.00E+00 | 2.250477 | 0.00013  | - | down |
| Mad1251 | Quercetin                                         | Flavonol                     | 1.10E+07 | 1.06E+07 | 1.17E+07 | 2.07E+05 | 1.42E+05 | 1.27E+05 | 1.553029 | 0.014294 | - | down |
| Mad629  | Kaempferol                                        | Flavonol                     | 3.73E+04 | 4.62E+04 | 4.07E+04 | 9.00E+00 | 9.00E+00 | 9.00E+00 | 2.184878 | 0.000217 | - | down |
| Mad1054 | Catechin                                          | Catechin derivatives         | 5.12E+07 | 5.00E+07 | 5.09E+07 | 1.04E+07 | 7.06E+06 | 8.08E+06 | 1.004953 | 0.167916 | - | down |
| Mad969  | Glutaric acid                                     | Organic acids                | 1.70E+06 | 1.44E+06 | 1.34E+06 | 9.00E+00 | 9.00E+00 | 1.14E+06 | 1.818066 | 0.254468 | - | down |
| Mad786  | 2,6-Diaminoimelic acid                            | Amino acid derivatives       | 4.34E+06 | 6.48E+06 | 4.86E+06 | 4.58E+05 | 3.02E+05 | 2.63E+05 | 1.239722 | 0.065242 | - | down |
| Mad1080 | Caffeic acid                                      | Hydroxycinnamoyl derivatives | 3.08E+06 | 2.92E+06 | 3.03E+06 | 1.27E+05 | 9.20E+04 | 7.92E+04 | 1.391358 | 0.033023 | - | down |
| Mad1170 | Ferulic acid                                      | Hydroxycinnamoyl derivatives | 1.25E+05 | 1.26E+05 | 1.69E+05 | 2.99E+04 | 1.69E+04 | 2.30E+04 | 1.002007 | 0.16619  | - | down |
| Mad688  | Chrysin                                           | Flavone                      | 5.59E+03 | 1.48E+04 | 8.38E+03 | 9.00E+00 | 9.00E+00 | 9.00E+00 | 1.972377 | 0.000938 | - | down |
| Mad444  | Apigenin 5-O-glucoside                            | Flavone                      | 1.13E+06 | 1.29E+06 | 1.35E+06 | 2.42E+05 | 1.70E+05 | 1.79E+05 | 1.022833 | 0.156764 | - | down |
| Mad631  | Chrysoeriol                                       | Flavone                      | 1.07E+04 | 7.15E+03 | 9.65E+03 | 9.00E+00 | 9.00E+00 | 9.00E+00 | 1.977811 | 0.000982 | - | down |
| Mad624  | Naringenin                                        | Flavanone                    | 6.11E+05 | 9.39E+05 | 5.51E+05 | 9.00E+00 | 9.00E+00 | 9.00E+00 | 2.52183  | 1.29E-05 | - | down |
| Mad401  | Chlorogenic acid methyl ester                     | Quinate and its derivatives  | 4.77E+06 | 5.11E+06 | 5.44E+06 | 1.80E+05 | 1.80E+05 | 1.81E+05 | 1.375632 | 0.035313 | - | down |
| Mad623  | Phloretin                                         | Flavanone                    | 1.41E+06 | 1.31E+06 | 1.48E+06 | 2.74E+04 | 1.88E+04 | 1.35E+04 | 1.555674 | 0.014214 | - | down |
| Mad1133 | Procyanidin A1                                    | Proanthocyanidins            | 2.65E+05 | 2.62E+05 | 2.99E+05 | 9.00E+00 | 9.00E+00 | 9.00E+00 | 2.418296 | 3.27E-05 | - | down |
| Mad4    | Gluconic acid                                     | Carbohydrates                | 4.18E+04 | 2.98E+04 | 2.90E+04 | 9.00E+00 | 9.00E+00 | 1.66E+04 | 1.558859 | 0.165189 | - | down |
| Mad109  | Guanine                                           | Nucleotide and its derivates | 2.51E+05 | 2.70E+05 | 3.76E+05 | 4.08E+04 | 3.27E+04 | 3.56E+04 | 1.084688 | 0.121628 | - | down |
| Mad962  | Gallic acid                                       | Benzoic acid derivatives     | 1.42E+05 | 1.30E+05 | 1.46E+05 | 2.28E+04 | 9.00E+00 | 9.00E+00 | 1.788116 | 0.054589 | - | down |
| Mad180  | Deoxyguanosine                                    | Nucleotide and its derivates | 7.17E+04 | 5.78E+04 | 5.36E+04 | 1.55E+04 | 1.06E+04 | 9.00E+00 | 1.191977 | 0.142594 | - | down |
| Mad101  | Deoxycytidine                                     | Nucleotide and its derivates | 6.28E+04 | 5.87E+04 | 4.62E+04 | 9.00E+00 | 1.39E+04 | 9.00E+00 | 1.672272 | 0.082993 | - | down |

|             |                                              |                              |              |              |              |              |              |              |              |          |         |          |
|-------------|----------------------------------------------|------------------------------|--------------|--------------|--------------|--------------|--------------|--------------|--------------|----------|---------|----------|
| Mad105<br>3 | Syringin                                     | Hydroxycinnamoyl derivatives | 9.22E+0<br>4 | 1.10E+0<br>5 | 7.23E+0<br>4 | 9.00E+0<br>0 | 9.00E+0<br>0 | 9.00E+0<br>0 | 2.28365<br>4 | 9.84E-05 | -       | dow<br>n |
| Mad113<br>7 | p-Coumaric acid                              | Hydroxycinnamoyl derivatives | 3.52E+0<br>6 | 3.74E+0<br>6 | 4.70E+0<br>6 | 1.56E+0<br>5 | 1.13E+0<br>5 | 6.63E+0<br>4 | 1.42530<br>2 | 0.028035 | -       | dow<br>n |
| Mad117<br>6 | Dihydroquercetin (Taxifolin)                 | Flavonol                     | 7.46E+0<br>5 | 7.92E+0<br>5 | 5.19E+0<br>5 | 1.03E+0<br>4 | 9.97E+0<br>3 | 9.36E+0<br>3 | 1.54499<br>2 | 0.014404 | -       | dow<br>n |
| Mad101<br>5 | (+)-Galocatechin (GC)                        | Catechin derivatives         | 1.11E+0<br>5 | 1.42E+0<br>5 | 8.67E+0<br>4 | 7.90E+0<br>3 | 1.32E+0<br>4 | 1.65E+0<br>4 | 1.10789<br>4 | 0.110686 | -       | dow<br>n |
| Mad124<br>2 | Orobol (5,7,3',4'-tetrahydroxyisoflavone)    | Isoflavone                   | 1.23E+0<br>5 | 5.08E+0<br>4 | 2.21E+0<br>5 | 3.33E+0<br>3 | 9.00E+0<br>0 | 9.00E+0<br>0 | 1.92653<br>8 | 0.00848  | -       | dow<br>n |
| Mad595      | Eriodictyol                                  | Flavanone                    | 1.08E+0<br>5 | 2.10E+0<br>5 | 9.44E+0<br>4 | 9.00E+0<br>0 | 9.00E+0<br>0 | 9.00E+0<br>0 | 2.32642<br>3 | 6.55E-05 | -       | dow<br>n |
| Mad129<br>0 | (+)-Jasmonic acid (JA)                       | Phytohormones                | 6.09E+0<br>5 | 6.02E+0<br>5 | 4.49E+0<br>5 | 3.77E+0<br>4 | 2.22E+0<br>4 | 2.29E+0<br>4 | 1.30193<br>7 | 0.04988  | -       | dow<br>n |
| Mad103<br>4 | Protocatechuic acid                          | Catechin derivatives         | 2.25E+0<br>6 | 2.38E+0<br>6 | 2.05E+0<br>6 | 2.90E+0<br>5 | 1.18E+0<br>5 | 1.83E+0<br>5 | 1.17466<br>6 | 0.088473 | -       | dow<br>n |
| Mad131<br>2 | N-[-(-)-Jasmonoyl]-(-)-Isoleucine (JA-L-Ile) | Phytohormones                | 2.17E+0<br>5 | 2.06E+0<br>5 | 1.62E+0<br>5 | 5.29E+0<br>3 | 2.57E+0<br>3 | 6.44E+0<br>3 | 1.45354<br>6 | 0.024444 | -       | dow<br>n |
| Mad43       | L-Carnitine                                  | Others                       | 4.20E+0<br>4 | 3.87E+0<br>4 | 4.06E+0<br>4 | 3.38E+0<br>4 | 9.00E+0<br>0 | 9.00E+0<br>0 | 1.51812<br>1 | 0.278796 | -       | dow<br>n |
| Mad919      | Fumaric acid                                 | Organic acids                | 1.52E+0<br>6 | 1.08E+0<br>6 | 2.33E+0<br>6 | 9.00E+0<br>0 | 9.00E+0<br>0 | 9.00E+0<br>0 | 2.61316<br>6 | 5.48E-06 | -       | dow<br>n |
| Mad903      | A-Ketoglutaric acid                          | Organic acids                | 2.36E+0<br>6 | 3.41E+0<br>6 | 2.52E+0<br>6 | 4.47E+0<br>5 | 4.02E+0<br>5 | 3.68E+0<br>5 | 1.03518<br>2 | 0.146803 | -       | dow<br>n |
| Mad113<br>6 | Luteolin 7-O-glucoside (Cynaroside)          | Flavone                      | 2.70E+0<br>6 | 2.51E+0<br>6 | 2.91E+0<br>6 | 3.77E+0<br>5 | 2.71E+0<br>5 | 3.95E+0<br>5 | 1.07734<br>9 | 0.128448 | -       | dow<br>n |
| Mad127<br>1 | Vitamin D3                                   | Vitamins                     | 4.21E+0<br>4 | 6.20E+0<br>4 | 4.92E+0<br>4 | 9.00E+0<br>0 | 9.00E+0<br>0 | 9.00E+0<br>0 | 2.21062<br>8 | 0.000176 | -       | dow<br>n |
| Mad178      | 2'-Deoxyinosine                              | Nucleotide and its derivates | 6.35E+0<br>4 | 8.04E+0<br>4 | 6.89E+0<br>4 | 1.19E+0<br>4 | 7.19E+0<br>3 | 1.11E+0<br>4 | 1.04904<br>8 | 0.14187  | -       | dow<br>n |
| Mad82       | L-Homocystine                                | Amino acids                  | 4.32E+0<br>5 | 7.70E+0<br>5 | 1.03E+0<br>6 | 1.16E+0<br>5 | 3.17E+0<br>4 | 3.97E+0<br>4 | 1.17330<br>2 | 0.083961 | -       | dow<br>n |
| Mad376      | Dihydromyricetin                             | Flavonol                     | 5.23E+0<br>5 | 5.75E+0<br>5 | 2.81E+0<br>5 | 4.18E+0<br>4 | 9.00E+0<br>0 | 9.00E+0<br>0 | 1.92051<br>5 | 0.030325 | -       | dow<br>n |
| Mad106<br>8 | 4-Hydroxybenzoic acid                        | Organic acids                | 4.41E+0<br>5 | 2.91E+0<br>5 | 3.44E+0<br>5 | 1.88E+0<br>5 | 1.53E+0<br>5 | 9.00E+0<br>0 | 1.08637<br>1 | 0.316923 | -1.6578 | dow<br>n |
| Mad943      | 3-Hydroxy-3-methylpentane-1,5-dioic acid     | Amino acid derivatives       | 5.37E+0<br>6 | 8.85E+0<br>6 | 5.35E+0<br>6 | 2.26E+0<br>5 | 2.92E+0<br>5 | 2.09E+0<br>5 | 1.35678<br>8 | 0.037149 | -       | dow<br>n |
| Mad126<br>8 | Naringenin chalcone                          | Flavanone                    | 6.32E+0<br>5 | 1.01E+0<br>6 | 5.49E+0<br>5 | 9.03E+0<br>3 | 9.00E+0<br>0 | 9.00E+0<br>0 | 2.12425<br>4 | 0.00413  | -       | dow<br>n |
| Mad122<br>0 | Aromadedrin (Dihydrokaempferol)              | Flavonol                     | 2.48E+0<br>5 | 2.94E+0<br>5 | 2.81E+0<br>5 | 9.00E+0<br>0 | 9.00E+0<br>0 | 9.00E+0<br>0 | 2.41777<br>8 | 3.28E-05 | -       | dow<br>n |
| Mad124<br>6 | Isosakuranetin-7-neohesperidoside (Poncirin) | Flavanone                    | 3.61E+0<br>6 | 4.34E+0<br>6 | 3.88E+0<br>6 | 3.15E+0<br>5 | 1.15E+0<br>5 | 1.27E+0<br>5 | 1.32469<br>2 | 0.047084 | -       | dow<br>n |
| Mad135      | 5-oxoproline                                 | Amino acid derivatives       | 6.45E+0<br>6 | 1.35E+0<br>7 | 8.53E+0<br>6 | 7.29E+0<br>5 | 1.07E+0<br>6 | 1.48E+0<br>6 | 1.08525<br>7 | 0.115133 | -       | dow<br>n |
| Mad114<br>6 | 2-(Formylamino)benzoic acid                  | Organic acids                | 3.13E+0<br>5 | 3.07E+0<br>5 | 3.75E+0<br>5 | 9.00E+0<br>0 | 9.00E+0<br>0 | 9.00E+0<br>0 | 2.43968<br>8 | 2.71E-05 | -       | dow<br>n |
| Mad104<br>1 | Coniferin                                    | Hydroxycinnamoyl derivatives | 1.45E+0<br>7 | 1.72E+0<br>7 | 1.31E+0<br>7 | 2.57E+0<br>6 | 1.42E+0<br>6 | 1.52E+0<br>6 | 1.08746<br>8 | 0.122991 | -       | dow<br>n |

|                    |                                               |                                 |              |              |              |              |              |              |              |          |              |          |
|--------------------|-----------------------------------------------|---------------------------------|--------------|--------------|--------------|--------------|--------------|--------------|--------------|----------|--------------|----------|
| Mad124<br>1        | 2'-Hydroxygenistein                           | Isoflavone                      | 1.95E+0<br>4 | 2.85E+0<br>4 | 1.86E+0<br>4 | 9.00E+0<br>0 | 9.00E+0<br>0 | 9.00E+0<br>0 | 2.10000<br>5 | 0.000405 | -<br>11.2683 | dow<br>n |
| Mad113<br>2        | Quercetin 7-O-β-D-Glucuronide                 | Flavonol                        | 2.74E+0<br>4 | 2.35E+0<br>4 | 2.57E+0<br>4 | 9.00E+0<br>0 | 9.00E+0<br>0 | 3.11E+0<br>3 | 1.68967<br>5 | 0.040836 | 4.61403      | dow<br>n |
| Mad528             | p-Coumaraldehyde                              | Hydroxycinnamoyl<br>derivatives | 3.31E+0<br>5 | 5.58E+0<br>5 | 4.05E+0<br>5 | 9.00E+0<br>0 | 9.00E+0<br>0 | 9.00E+0<br>0 | 2.46742<br>2 | 2.09E-05 | -<br>15.5485 | dow<br>n |
| Mad626             | Butin                                         | Flavone                         | 5.96E+0<br>5 | 9.25E+0<br>5 | 6.15E+0<br>5 | 9.00E+0<br>0 | 9.00E+0<br>0 | 9.00E+0<br>0 | 2.52461<br>2 | 1.26E-05 | -<br>16.2716 | dow<br>n |
| Mad105<br>1        | Pantetheine                                   | Vitamins                        | 2.05E+0<br>4 | 2.56E+0<br>4 | 4.17E+0<br>3 | 9.00E+0<br>0 | 5.08E+0<br>3 | 3.18E+0<br>3 | 1.04645<br>1 | 0.164492 | -<br>2.60391 | dow<br>n |
| Mad125<br>4        | Morin                                         | Flavonol                        | 1.14E+0<br>7 | 1.12E+0<br>7 | 1.26E+0<br>7 | 2.15E+0<br>5 | 1.53E+0<br>5 | 1.31E+0<br>5 | 1.55432<br>3 | 0.014176 | -<br>6.14039 | dow<br>n |
| Mad198             | Deoxyadenosine                                | Nucleotide and its<br>derivates | 8.36E+0<br>5 | 8.97E+0<br>5 | 7.02E+0<br>5 | 1.36E+0<br>5 | 8.86E+0<br>4 | 9.66E+0<br>4 | 1.06857<br>8 | 0.13191  | -<br>2.92238 | dow<br>n |
| Mad219             | 2-(dimethylamino)guanosine                    | Nucleotide and its<br>derivates | 2.58E+0<br>5 | 3.53E+0<br>5 | 2.65E+0<br>5 | 3.70E+0<br>4 | 2.73E+0<br>4 | 3.21E+0<br>4 | 1.11334<br>5 | 0.110046 | -<br>3.18383 | dow<br>n |
| <b>PS2 vs PS3:</b> |                                               |                                 | <b>PS2a</b>  | <b>PS2b</b>  | <b>PS2c</b>  | <b>PS3a</b>  | <b>PS3b</b>  | <b>PS3c</b>  |              |          |              |          |
| Mad759             | 9-Hydroxy-(10E,12Z,15Z)-octadecatrienoic acid | Lipids_Fatty acids              | 2.05E+0<br>4 | 2.36E+0<br>4 | 2.17E+0<br>4 | 4.66E+0<br>4 | 5.18E+0<br>4 | 3.78E+0<br>4 | 1.00813      | 2.069909 | 1.04956<br>7 | up       |
| Mad359             | di-C,C-hexosyl-luteolin                       | Flavone C-glycosides            | 9.00E+0<br>0 | 2.22E+0<br>3 | 9.00E+0<br>0 | 6.66E+0<br>3 | 9.00E+0<br>0 | 2.72E+0<br>3 | 1.12605<br>7 | 4.195264 | 2.06876<br>1 | up       |
| Mad228             | N'-p-Coumaroyl putrescine                     | Phenolamides                    | 9.00E+0<br>0 | 9.00E+0<br>0 | 9.00E+0<br>0 | 9.00E+0<br>0 | 9.78E+0<br>3 | 9.00E+0<br>0 | 1.23457<br>1 | 362.8889 | 8.50338<br>4 | up       |
| Mad248             | Cyanidin 3-O-glucoside (Kuromanin)            | Anthocyanins                    | 3.77E+0<br>5 | 9.62E+0<br>4 | 8.40E+0<br>4 | 2.54E+0<br>5 | 1.49E+0<br>6 | 4.00E+0<br>5 | 1.13274<br>6 | 3.84781  | 1.94403<br>8 | up       |
| Mad690             | Azoxystrobin acid                             | Others                          | 4.45E+0<br>4 | 8.10E+0<br>4 | 4.97E+0<br>4 | 1.18E+0<br>5 | 1.35E+0<br>5 | 1.78E+0<br>5 | 1.10328<br>6 | 2.460046 | 1.29868<br>5 | up       |
| Mad100             | Piperidine                                    | Alkaloids                       | 2.45E+0<br>5 | 4.19E+0<br>5 | 5.20E+0<br>5 | 1.29E+0<br>6 | 8.42E+0<br>5 | 8.38E+0<br>5 | 1.09859<br>1 | 2.508446 | 1.32679<br>4 | up       |
| Mad722             | LysoPC 16:1 (2n isomer)                       | Lipids_Glycerophospholip<br>ids | 5.29E+0<br>4 | 6.19E+0<br>4 | 6.27E+0<br>4 | 1.05E+0<br>5 | 1.50E+0<br>5 | 1.25E+0<br>5 | 1.02669<br>6 | 2.140845 | 1.09818      | up       |
| Mad704             | LysoPC 16:2 (2n isomer)                       | Lipids_Glycerophospholip<br>ids | 9.18E+0<br>3 | 9.37E+0<br>3 | 9.07E+0<br>3 | 2.92E+0<br>4 | 4.13E+0<br>4 | 3.86E+0<br>4 | 1.40430<br>3 | 3.950036 | 1.98186<br>6 | up       |
| Mad715             | LysoPE 14:0                                   | Lipids_Glycerophospholip<br>ids | 9.00E+0<br>0 | 1.91E+0<br>3 | 9.00E+0<br>0 | 2.63E+0<br>3 | 2.57E+0<br>3 | 3.89E+0<br>3 | 2.09661<br>5 | 4.71473  | 2.23717<br>5 | up       |
| Mad771             | MAG (18:2)                                    | Lipids_Glycerolipids            | 6.90E+0<br>4 | 9.88E+0<br>4 | 7.99E+0<br>4 | 1.98E+0<br>5 | 2.70E+0<br>5 | 1.59E+0<br>5 | 1.11501<br>9 | 2.531288 | 1.33987<br>2 | up       |
| Mad420             | Phellodensin F                                | Others                          | 9.00E+0<br>0 | 9.00E+0<br>0 | 9.00E+0<br>0 | 4.11E+0<br>3 | 9.00E+0<br>0 | 9.00E+0<br>0 | 1.15663<br>7 | 152.8889 | 7.25634      | up       |
| Mad718             | LysoPC 15:1                                   | Lipids_Glycerophospholip<br>ids | 4.20E+0<br>3 | 3.45E+0<br>3 | 9.00E+0<br>0 | 5.89E+0<br>3 | 6.50E+0<br>3 | 8.22E+0<br>3 | 1.43644<br>7 | 2.690952 | 1.42811<br>7 | up       |
| Mad727             | LysoPC 15:0                                   | Lipids_Glycerophospholip<br>ids | 1.08E+0<br>4 | 1.71E+0<br>4 | 1.42E+0<br>4 | 2.32E+0<br>4 | 2.61E+0<br>4 | 5.24E+0<br>4 | 1.00090<br>8 | 2.415677 | 1.27242<br>8 | up       |
| Mad761             | LysoPC 17:0                                   | Lipids_Glycerophospholip<br>ids | 9.12E+0<br>3 | 1.03E+0<br>4 | 9.76E+0<br>3 | 2.73E+0<br>4 | 2.40E+0<br>4 | 5.91E+0<br>4 | 1.28998<br>4 | 3.783413 | 1.91968<br>8 | up       |
| Mad134<br>9        | 9-KODE                                        | Lipids_Fatty acids              | 9.00E+0<br>0 | 9.00E+0<br>0 | 9.00E+0<br>0 | 6.38E+0<br>3 | 6.37E+0<br>3 | 9.00E+0<br>0 | 2.12820<br>8 | 472.5556 | 8.88434      | up       |
| Mad133<br>9        | 13-HpOTrE(r)                                  | Lipids_Fatty acids              | 9.00E+0<br>0 | 9.00E+0<br>0 | 9.00E+0<br>0 | 2.35E+0<br>3 | 3.48E+0<br>3 | 2.72E+0<br>3 | 2.89936<br>6 | 316.6667 | 8.30682<br>1 | up       |
| Mad135<br>2        | 12,13-EODE                                    | Lipids_Fatty acids              | 9.00E+0<br>0 | 9.00E+0<br>0 | 9.00E+0<br>0 | 1.99E+0<br>3 | 1.23E+0<br>3 | 9.00E+0<br>0 | 1.88524<br>3 | 119.5926 | 6.90198<br>4 | up       |

|             |                                                         |                              |              |              |              |              |              |              |              |          |              |          |
|-------------|---------------------------------------------------------|------------------------------|--------------|--------------|--------------|--------------|--------------|--------------|--------------|----------|--------------|----------|
| Mad861      | Citramalate                                             | Organic acids                | 2.23E+0<br>6 | 2.15E+0<br>6 | 2.14E+0<br>6 | 1.29E+0<br>7 | 9.44E+0<br>6 | 6.65E+0<br>6 | 1.43605<br>1 | 4.446319 | 2.15261<br>1 | up       |
| Mad101<br>7 | Cyanidin O-syringic acid                                | Anthocyanins                 | 5.54E+0<br>4 | 9.00E+0<br>0 | 9.00E+0<br>0 | 9.00E+0<br>0 | 3.43E+0<br>5 | 6.33E+0<br>4 | 1.40113<br>3 | 7.331715 | 2.87415<br>1 | up       |
| Mad102<br>0 | Esculetin O-quinacyl esculetin O-quinic acid            | Coumarins                    | 9.00E+0<br>0 | 9.00E+0<br>0 | 3.22E+0<br>6 | 2.67E+0<br>6 | 2.07E+0<br>6 | 2.66E+0<br>6 | 2.89569<br>7 | 2.298124 | 1.20045<br>7 | up       |
| Mad102<br>5 | 2,3-dimethylsuccinic acid                               | Amino acid derivatives       | 3.37E+0<br>4 | 2.84E+0<br>4 | 2.59E+0<br>4 | 1.02E+0<br>5 | 5.14E+0<br>4 | 1.40E+0<br>5 | 1.20638      | 3.334091 | 1.73729<br>3 | up       |
| Mad969      | Glutaric acid                                           | Organic acids                | 9.00E+0<br>0 | 9.00E+0<br>0 | 1.14E+0<br>6 | 9.98E+0<br>5 | 9.39E+0<br>5 | 7.46E+0<br>5 | 2.77580<br>7 | 2.353472 | 1.23479      | up       |
| Mad102<br>3 | Adipic acid                                             | Organic acids                | 2.71E+0<br>4 | 2.59E+0<br>4 | 1.01E+0<br>4 | 1.16E+0<br>5 | 5.12E+0<br>4 | 1.26E+0<br>5 | 1.41091<br>5 | 4.646593 | 2.21617<br>3 | up       |
| Mad93       | 6-Aminocaproic acid                                     | Organic acids                | 9.20E+0<br>5 | 2.03E+0<br>6 | 2.55E+0<br>6 | 5.50E+0<br>6 | 4.08E+0<br>6 | 4.15E+0<br>6 | 1.10218<br>6 | 2.496364 | 1.31982<br>8 | up       |
| Mad909      | L-(+)-Tartaric acid                                     | Organic acids                | 3.52E+0<br>4 | 5.18E+0<br>4 | 3.83E+0<br>4 | 3.05E+0<br>5 | 2.19E+0<br>5 | 1.35E+0<br>5 | 1.50221      | 5.259377 | 2.39489<br>2 | up       |
| Mad125<br>2 | (+)-cis,trans-Abscisic acid (ABA)                       | Phytohormones                | 1.90E+0<br>5 | 2.12E+0<br>5 | 2.05E+0<br>5 | 4.20E+0<br>5 | 6.63E+0<br>5 | 4.47E+0<br>5 | 1.12236<br>6 | 2.520593 | 1.33376<br>3 | up       |
| Mad43       | L-Carnitine                                             | Others                       | 3.38E+0<br>4 | 9.00E+0<br>0 | 9.00E+0<br>0 | 4.77E+0<br>4 | 5.07E+0<br>4 | 4.70E+0<br>4 | 2.49884<br>5 | 4.299485 | 2.10416<br>4 | up       |
| Mad778      | trans,trans-Muconic acid                                | Organic acids                | 3.99E+0<br>5 | 4.06E+0<br>5 | 4.55E+0<br>5 | 1.25E+0<br>6 | 9.25E+0<br>5 | 7.81E+0<br>5 | 1.07543<br>4 | 2.346032 | 1.23022<br>3 | up       |
| Mad111<br>4 | p-Coumaryl alcohol                                      | Hydroxycinnamoyl derivatives | 3.54E+0<br>4 | 3.13E+0<br>4 | 9.91E+0<br>3 | 4.10E+0<br>5 | 3.03E+0<br>5 | 2.94E+0<br>5 | 1.94520<br>3 | 13.1445  | 3.71638<br>7 | up       |
| Mad390      | 1-O-Feruloyl quinic acid                                | Quinate and its derivatives  | 6.12E+0<br>4 | 3.25E+0<br>4 | 7.47E+0<br>4 | 1.71E+0<br>4 | 9.56E+0<br>3 | 2.47E+0<br>4 | 1.22322      | 0.304988 | -<br>1.71318 | dow<br>n |
| Mad577      | Chrysin O-hexoside                                      | Flavone                      | 1.05E+0<br>5 | 7.90E+0<br>4 | 9.64E+0<br>4 | 4.82E+0<br>4 | 2.98E+0<br>4 | 5.31E+0<br>4 | 1.01210<br>7 | 0.467546 | -<br>1.09682 | dow<br>n |
| Mad108<br>4 | 5-O-p-Coumaroylquinic acid                              | Quinate and its derivatives  | 8.61E+0<br>5 | 7.74E+0<br>5 | 8.66E+0<br>5 | 4.07E+0<br>5 | 2.62E+0<br>5 | 3.91E+0<br>5 | 1.10341<br>2 | 0.42383  | -<br>1.23844 | dow<br>n |
| Mad750      | MAG (18:1) isomer2                                      | Lipids_Glycerolipids         | 4.66E+0<br>4 | 5.44E+0<br>4 | 5.37E+0<br>4 | 3.03E+0<br>4 | 2.68E+0<br>4 | 1.60E+0<br>4 | 1.00971<br>6 | 0.472527 | -<br>1.08153 | dow<br>n |
| Mad334      | Hydroxy-methoxycinnamate                                | Hydroxycinnamoyl derivatives | 2.18E+0<br>6 | 1.26E+0<br>6 | 1.48E+0<br>6 | 2.48E+0<br>5 | 3.05E+0<br>5 | 3.18E+0<br>5 | 1.56559<br>1 | 0.177033 | -<br>2.49791 | dow<br>n |
| Mad240      | N',N''',N''''-p-coumaroyl-cinnamoyl-caffeoyl spermidine | Phenolamides                 | 2.52E+0<br>3 | 9.00E+0<br>0 | 9.00E+0<br>0 | 9.00E+0<br>0 | 9.00E+0<br>0 | 9.00E+0<br>0 | 1.10916<br>2 | 0.010638 | -<br>6.55459 | dow<br>n |
| Mad11       | Agmatine                                                | Phenolamides                 | 6.58E+0<br>3 | 4.46E+0<br>3 | 4.72E+0<br>3 | 5.05E+0<br>3 | 9.00E+0<br>0 | 9.00E+0<br>0 | 2.09834<br>2 | 0.321574 | -<br>1.63678 | dow<br>n |
| Mad356      | Rosinidin O-hexoside                                    | Anthocyanins                 | 7.17E+0<br>3 | 9.00E+0<br>0 | 5.89E+0<br>3 | 9.00E+0<br>0 | 9.00E+0<br>0 | 9.00E+0<br>0 | 2.13390<br>1 | 0.002066 | -<br>8.91897 | dow<br>n |
| Mad386      | Quercetin 7-O-malonylhexosyl-hexoside                   | Flavonol                     | 4.67E+0<br>3 | 5.35E+0<br>3 | 4.06E+0<br>3 | 9.00E+0<br>0 | 5.86E+0<br>3 | 9.00E+0<br>0 | 2.03001<br>6 | 0.417472 | -<br>1.26025 | dow<br>n |
| Mad430      | 5-O-p-Coumaroyl shikimic acid                           | Quinate and its derivatives  | 2.86E+0<br>4 | 7.97E+0<br>3 | 2.19E+0<br>4 | 9.00E+0<br>0 | 9.00E+0<br>0 | 9.00E+0<br>0 | 3.31661<br>2 | 0.000462 | -<br>11.0805 | dow<br>n |
| Mad585      | N-Feruloyl tyramine                                     | Phenolamides                 | 9.00E+0<br>0 | 8.22E+0<br>3 | 9.00E+0<br>0 | 9.00E+0<br>0 | 9.00E+0<br>0 | 9.00E+0<br>0 | 1.21724<br>2 | 0.003277 | -<br>8.25319 | dow<br>n |
| Mad163      | Niacinamide                                             | Vitamins                     | 7.06E+0<br>4 | 5.03E+0<br>4 | 6.72E+0<br>4 | 3.14E+0<br>4 | 3.54E+0<br>4 | 2.13E+0<br>4 | 1.00806<br>3 | 0.468368 | -<br>1.09429 | dow<br>n |
| Mad323      | Pyridoxine O-feruloyl hexoside                          | Vitamins                     | 2.24E+0<br>4 | 1.19E+0<br>4 | 9.88E+0<br>3 | 1.88E+0<br>4 | 9.00E+0<br>0 | 9.00E+0<br>0 | 2.18798<br>8 | 0.425939 | -<br>1.23128 | dow<br>n |

|             |                                     |                                 |              |              |              |              |              |              |              |          |         |          |
|-------------|-------------------------------------|---------------------------------|--------------|--------------|--------------|--------------|--------------|--------------|--------------|----------|---------|----------|
| Mad235      | Methoxyindoleacetic acid            | Indole derivatives              | 3.18E+0<br>4 | 7.65E+0<br>4 | 1.39E+0<br>5 | 1.69E+0<br>4 | 2.90E+0<br>4 | 2.24E+0<br>4 | 1.14416      | 0.276183 | -1.8563 | dow<br>n |
| Mad747      | LysoPE 18:1 (2n isomer)             | Lipids_Glycerophospholip<br>ids | 5.27E+0<br>5 | 3.81E+0<br>5 | 5.31E+0<br>5 | 1.66E+0<br>5 | 1.19E+0<br>5 | 9.16E+0<br>4 | 1.38081<br>8 | 0.26171  | -       | dow<br>n |
| Mad749      | LysoPC 18:1 (2n isomer)             | Lipids_Glycerophospholip<br>ids | 8.22E+0<br>6 | 5.74E+0<br>6 | 5.90E+0<br>6 | 3.63E+0<br>6 | 2.57E+0<br>6 | 2.71E+0<br>6 | 1.04376<br>5 | 0.44864  | -       | dow<br>n |
| Mad241      | Indole                              | Indole derivatives              | 5.47E+0<br>3 | 1.61E+0<br>4 | 1.97E+0<br>4 | 9.00E+0<br>0 | 9.00E+0<br>0 | 3.40E+0<br>3 | 2.45861<br>9 | 0.08282  | -       | dow<br>n |
| Mad46       | O-Phosphocholine                    | Cholines                        | 1.21E+0<br>5 | 1.01E+0<br>5 | 1.49E+0<br>5 | 1.47E+0<br>4 | 1.30E+0<br>4 | 8.88E+0<br>3 | 1.83401<br>3 | 0.098598 | -       | dow<br>n |
| Mad755      | LysoPC 18:0 (2n isomer)             | Lipids_Glycerophospholip<br>ids | 7.60E+0<br>4 | 5.30E+0<br>4 | 6.07E+0<br>4 | 3.29E+0<br>4 | 2.29E+0<br>4 | 2.46E+0<br>4 | 1.08942<br>4 | 0.423827 | -       | dow<br>n |
| Mad963      | Cyclic AMP                          | Nucleotide and its<br>derivates | 6.93E+0<br>4 | 4.82E+0<br>4 | 4.57E+0<br>4 | 2.41E+0<br>4 | 2.64E+0<br>4 | 2.39E+0<br>4 | 1.03084<br>2 | 0.455882 | -       | dow<br>n |
| Mad107<br>9 | 1-O-beta-D-Glucopyranosyl sinapate  | Hydroxycinnamoyl<br>derivatives | 8.10E+0<br>5 | 4.32E+0<br>5 | 4.22E+0<br>5 | 1.49E+0<br>5 | 2.38E+0<br>5 | 8.61E+0<br>4 | 1.28500<br>1 | 0.284315 | -       | dow<br>n |
| Mad111<br>1 | Catechin-catechin-catechin          | Catechin derivatives            | 1.37E+0<br>6 | 6.87E+0<br>5 | 7.24E+0<br>5 | 3.53E+0<br>5 | 2.32E+0<br>5 | 3.38E+0<br>5 | 1.18622<br>6 | 0.331895 | -1.5912 | dow<br>n |
| Mad118<br>8 | Apigenin 7-O-glucoside (Cosmosiin)  | Flavone                         | 2.66E+0<br>5 | 1.95E+0<br>5 | 2.09E+0<br>5 | 7.89E+0<br>4 | 8.42E+0<br>4 | 8.55E+0<br>4 | 1.18844<br>5 | 0.371045 | -       | dow<br>n |
| Mad122<br>8 | Luteolin O-eudesmic acid-O-hexoside | Flavone                         | 3.27E+0<br>5 | 2.45E+0<br>5 | 1.80E+0<br>5 | 9.38E+0<br>4 | 3.14E+0<br>4 | 4.43E+0<br>4 | 1.44231<br>6 | 0.225399 | -       | dow<br>n |
| Mad116<br>1 | Quercetin O-acetylhexoside          | Flavonol                        | 4.47E+0<br>6 | 3.31E+0<br>6 | 2.93E+0<br>6 | 7.97E+0<br>5 | 2.33E+0<br>6 | 1.31E+0<br>6 | 1.07425<br>3 | 0.414286 | -1.2713 | dow<br>n |
| Mad119<br>8 | Tricin 7-O-hexoside                 | Flavone                         | 5.32E+0<br>5 | 3.05E+0<br>5 | 1.59E+0<br>5 | 2.22E+0<br>5 | 2.88E+0<br>4 | 5.29E+0<br>4 | 1.23257<br>4 | 0.30492  | -1.7135 | dow<br>n |
| Mad848      | Trehalose 6-phosphate               | Carbohydrates                   | 9.43E+0<br>4 | 6.11E+0<br>4 | 5.65E+0<br>4 | 9.00E+0<br>0 | 6.47E+0<br>4 | 3.61E+0<br>4 | 1.51724<br>3 | 0.475739 | -       | dow<br>n |
| Mad881      | Glutathione oxidized                | Amino acid derivatives          | 8.21E+0<br>4 | 1.01E+0<br>5 | 1.15E+0<br>5 | 4.65E+0<br>4 | 3.18E+0<br>4 | 1.06E+0<br>4 | 1.29303<br>4 | 0.298222 | -       | dow<br>n |
| Mad195      | 6-Methylmercaptapurine              | Nucleotide and its<br>derivates | 1.46E+0<br>7 | 1.22E+0<br>7 | 1.51E+0<br>7 | 1.06E+0<br>6 | 9.71E+0<br>5 | 1.16E+0<br>6 | 1.93936<br>7 | 0.076158 | -       | dow<br>n |
| Mad208      | Succinyladenosine                   | Nucleotide and its<br>derivates | 3.39E+0<br>5 | 2.95E+0<br>5 | 3.03E+0<br>5 | 1.47E+0<br>5 | 1.12E+0<br>5 | 1.80E+0<br>5 | 1.03138<br>4 | 0.468517 | -       | dow<br>n |
| Mad754      | LysoPC 20:4                         | Lipids_Glycerophospholip<br>ids | 5.82E+0<br>5 | 4.22E+0<br>5 | 5.09E+0<br>5 | 2.80E+0<br>5 | 1.82E+0<br>5 | 2.08E+0<br>5 | 1.06061<br>9 | 0.442829 | -       | dow<br>n |
| Mad769      | LysoPC 20:1                         | Lipids_Glycerophospholip<br>ids | 1.18E+0<br>5 | 7.26E+0<br>4 | 5.75E+0<br>4 | 2.83E+0<br>4 | 3.09E+0<br>4 | 2.38E+0<br>4 | 1.19172<br>8 | 0.334543 | -       | dow<br>n |
| Mad65       | L-Proline                           | Amino acids                     | 3.57E+0<br>6 | 6.77E+0<br>6 | 9.35E+0<br>6 | 1.60E+0<br>6 | 3.17E+0<br>6 | 2.12E+0<br>6 | 1.10894<br>3 | 0.349924 | -       | dow<br>n |
| Mad196      | L-Phenylalanine                     | Amino acids                     | 3.87E+0<br>7 | 3.79E+0<br>7 | 3.76E+0<br>7 | 1.50E+0<br>7 | 1.41E+0<br>7 | 1.59E+0<br>7 | 1.16683<br>3 | 0.394046 | -       | dow<br>n |
| Mad157      | Uridine                             | Nucleotide and its<br>derivates | 4.37E+0<br>6 | 2.57E+0<br>6 | 3.29E+0<br>6 | 1.18E+0<br>6 | 1.15E+0<br>6 | 1.05E+0<br>6 | 1.23567<br>7 | 0.330401 | -       | dow<br>n |
| Mad120      | Adenine                             | Nucleotide and its<br>derivates | 1.45E+0<br>5 | 1.72E+0<br>5 | 2.14E+0<br>5 | 5.19E+0<br>4 | 6.38E+0<br>4 | 5.72E+0<br>4 | 1.26065<br>8 | 0.325612 | -       | dow<br>n |
| Mad132      | N-Acetyl-L-glutamic acid            | Amino acid derivatives          | 2.84E+0<br>5 | 2.51E+0<br>5 | 1.68E+0<br>5 | 5.19E+0<br>4 | 1.17E+0<br>5 | 3.72E+0<br>4 | 1.29839<br>1 | 0.293172 | -       | dow<br>n |
| Mad35       | 5-Aminovaleric acid                 | Amino acid derivatives          | 1.14E+0<br>4 | 1.40E+0<br>4 | 1.66E+0<br>4 | 6.71E+0<br>3 | 9.00E+0<br>0 | 5.14E+0<br>3 | 1.58891<br>7 | 0.282357 | -       | dow<br>n |

|         |                                   |                              |          |          |          |          |          |          |          |          |         |       |
|---------|-----------------------------------|------------------------------|----------|----------|----------|----------|----------|----------|----------|----------|---------|-------|
| Mad1016 | Asp-phe                           | Amino acid derivatives       | 5.84E+04 | 5.05E+04 | 5.39E+04 | 3.58E+04 | 1.89E+04 | 2.12E+04 | 1.024478 | 0.466216 | -       | dow n |
| Mad50   | 2-Hydroxy-6-aminopurine           | Nucleotide and its derivates | 1.44E+05 | 1.05E+05 | 1.28E+05 | 4.46E+04 | 7.30E+04 | 5.65E+04 | 1.027241 | 0.461804 | -       | dow n |
| Mad1251 | Quercetin                         | Flavonol                     | 2.07E+05 | 1.42E+05 | 1.27E+05 | 3.25E+04 | 3.98E+04 | 3.30E+04 | 1.460512 | 0.221218 | -       | dow n |
| Mad1040 | Kynurenic acid                    | Organic acids                | 8.49E+04 | 1.31E+05 | 7.28E+04 | 2.70E+04 | 4.14E+04 | 3.19E+04 | 1.186407 | 0.347419 | -       | dow n |
| Mad107  | Uracil                            | Nucleotide and its derivates | 3.37E+05 | 2.15E+05 | 3.00E+05 | 8.90E+04 | 1.06E+05 | 1.15E+05 | 1.182692 | 0.36385  | -       | dow n |
| Mad786  | 2,6-Diaminooimelic acid           | Amino acid derivatives       | 4.58E+05 | 3.02E+05 | 2.63E+05 | 8.81E+04 | 6.62E+04 | 1.32E+05 | 1.320492 | 0.279863 | -       | dow n |
| Mad1080 | Caffeic acid                      | Hydroxycinnamoyl derivatives | 1.27E+05 | 9.20E+04 | 7.92E+04 | 4.58E+04 | 4.21E+04 | 4.04E+04 | 1.067811 | 0.430248 | -       | dow n |
| Mad1170 | Ferulic acid                      | Hydroxycinnamoyl derivatives | 2.99E+04 | 1.69E+04 | 2.30E+04 | 9.00E+00 | 2.18E+04 | 9.00E+04 | 2.331994 | 0.312579 | -       | dow n |
| Mad444  | Apigenin 5-O-glucoside            | Flavone                      | 2.42E+05 | 1.70E+05 | 1.79E+05 | 4.49E+04 | 8.40E+04 | 9.83E+04 | 1.135799 | 0.384433 | -1.3792 | dow n |
| Mad1187 | Naringenin 7-O-glucoside (Prunin) | Flavanone                    | 4.69E+06 | 3.18E+06 | 3.05E+06 | 1.52E+06 | 1.70E+06 | 1.37E+06 | 1.084056 | 0.42033  | -       | dow n |
| Mad362  | Homovanillic acid                 | Hydroxycinnamoyl derivatives | 5.18E+04 | 5.37E+04 | 3.54E+04 | 9.00E+00 | 2.84E+04 | 2.00E+04 | 1.597626 | 0.34357  | -       | dow n |
| Mad863  | Shikimic acid                     | Organic acids                | 9.44E+05 | 5.63E+05 | 5.31E+05 | 1.75E+05 | 1.91E+05 | 2.56E+05 | 1.264932 | 0.305201 | -       | dow n |
| Mad401  | Chlorogenic acid methyl ester     | Quinate and its derivatives  | 1.80E+05 | 1.80E+05 | 1.81E+05 | 1.04E+05 | 6.87E+04 | 7.87E+04 | 1.045184 | 0.464695 | -       | dow n |
| Mad623  | Phloretin                         | Flavanone                    | 2.74E+04 | 1.88E+04 | 1.35E+04 | 9.00E+00 | 1.36E+04 | 9.85E+03 | 1.477053 | 0.392948 | -       | dow n |
| Mad1182 | 3-Hydroxy-4-methoxycinnamic acid  | Hydroxycinnamoyl derivatives | 2.43E+04 | 2.26E+04 | 1.86E+04 | 9.00E+00 | 9.00E+00 | 9.00E+00 | 3.376793 | 0.000412 | -       | dow n |
| Mad947  | Methylmalonic acid                | Organic acids                | 9.38E+06 | 1.12E+07 | 1.06E+07 | 4.53E+06 | 7.15E+06 | 2.91E+06 | 1.007044 | 0.467928 | -       | dow n |
| Mad108  | Nicotinic acid                    | Nicotinic acid derivatives   | 2.34E+05 | 2.27E+05 | 2.38E+05 | 1.35E+05 | 3.04E+05 | 9.00E+05 | 2.262310 | 0.062817 | -3.9927 | dow n |
| Mad4    | Gluconic acid                     | Carbohydrates                | 9.00E+00 | 9.00E+00 | 1.66E+04 | 9.00E+00 | 9.00E+00 | 9.00E+00 | 1.284164 | 0.001625 | -       | dow n |
| Mad894  | L(-)-Tyrosine                     | Amino acids                  | 1.19E+05 | 1.31E+05 | 1.61E+05 | 1.33E+04 | 1.58E+04 | 1.31E+04 | 1.820137 | 0.102676 | -       | dow n |
| Mad109  | Guanine                           | Nucleotide and its derivates | 4.08E+04 | 3.27E+04 | 3.56E+04 | 1.64E+04 | 1.97E+04 | 1.42E+04 | 1.046419 | 0.461045 | -       | dow n |
| Mad71   | Inosine                           | Nucleotide and its derivates | 1.97E+05 | 1.20E+05 | 1.07E+05 | 3.55E+04 | 2.93E+04 | 8.07E+04 | 1.183354 | 0.34316  | -       | dow n |
| Mad962  | Gallic acid                       | Benzoic acid derivatives     | 2.28E+04 | 9.00E+00 | 9.00E+00 | 9.00E+00 | 9.00E+00 | 9.00E+00 | 1.308095 | 0.001183 | -9.723  | dow n |
| Mad180  | Deoxyguanosine                    | Nucleotide and its derivates | 1.55E+04 | 1.06E+04 | 9.00E+00 | 9.00E+00 | 9.00E+00 | 9.00E+00 | 2.236031 | 0.001034 | -       | dow n |
| Mad927  | S-(5'-Adenosy)-L-homocysteine     | Amino acid derivatives       | 1.54E+04 | 1.72E+04 | 8.69E+03 | 6.59E+03 | 9.48E+03 | 9.00E+00 | 1.454544 | 0.389416 | -       | dow n |
| Mad960  | Xanthosine                        | Nucleotide and its derivates | 2.31E+04 | 2.14E+04 | 2.05E+04 | 1.02E+04 | 1.57E+04 | 9.00E+00 | 1.501290 | 0.3986   | -       | dow n |

|             |                                              |                                |              |              |              |              |              |              |              |          |         |          |
|-------------|----------------------------------------------|--------------------------------|--------------|--------------|--------------|--------------|--------------|--------------|--------------|----------|---------|----------|
| Mad113<br>7 | p-Coumaric acid                              | Hydroxycinnamoyl derivatives   | 1.56E+0<br>5 | 1.13E+0<br>5 | 6.63E+0<br>4 | 6.54E+0<br>4 | 3.39E+0<br>4 | 9.00E+0<br>0 | 1.69734<br>7 | 0.29618  | -       | dow<br>n |
| Mad124<br>2 | Orobol (5,7,3',4'-tetrahydroxyisoflavone)    | Isoflavone                     | 3.33E+0<br>3 | 9.00E+0<br>0 | 9.00E+0<br>0 | 9.00E+0<br>0 | 9.00E+0<br>0 | 9.00E+0<br>0 | 1.13626<br>2 | 0.008065 | -6.9542 | dow<br>n |
| Mad129<br>0 | (+)-Jasmonic acid (JA)                       | Phytohormones                  | 3.77E+0<br>4 | 2.22E+0<br>4 | 2.29E+0<br>4 | 5.92E+0<br>3 | 2.18E+0<br>4 | 9.00E+0<br>0 | 1.62499<br>1 | 0.334891 | -       | dow<br>n |
| Mad218      | D-Pantothenic acid                           | Organic acids                  | 5.51E+0<br>3 | 3.92E+0<br>3 | 6.10E+0<br>3 | 2.42E+0<br>3 | 9.00E+0<br>0 | 2.54E+0<br>3 | 1.46784<br>8 | 0.319961 | -       | dow<br>n |
| Mad988      | 3-Hydroxy-3-methyl butyric acid              | Organic acids                  | 6.88E+0<br>4 | 9.37E+0<br>4 | 9.90E+0<br>4 | 1.57E+0<br>4 | 2.06E+0<br>4 | 9.00E+0<br>0 | 1.94289<br>6 | 0.138849 | -       | dow<br>n |
| Mad928      | Succinic acid                                | Organic acids                  | 1.01E+0<br>7 | 1.18E+0<br>7 | 1.02E+0<br>7 | 4.45E+0<br>6 | 6.90E+0<br>6 | 2.80E+0<br>6 | 1.05294<br>6 | 0.44081  | -       | dow<br>n |
| Mad221      | Theobromine                                  | Alkaloids                      | 8.24E+0<br>3 | 7.67E+0<br>3 | 7.35E+0<br>3 | 5.07E+0<br>3 | 9.00E+0<br>0 | 6.54E+0<br>3 | 1.33078<br>1 | 0.499527 | -       | dow<br>n |
| Mad72       | Trigonelline                                 | Alkaloids                      | 1.02E+0<br>6 | 1.47E+0<br>6 | 1.71E+0<br>6 | 5.34E+0<br>5 | 3.58E+0<br>5 | 2.15E+0<br>5 | 1.35857<br>3 | 0.263571 | -       | dow<br>n |
| Mad178      | 2'-Deoxyinosine                              | Nucleotide and its derivatives | 1.19E+0<br>4 | 7.19E+0<br>3 | 1.11E+0<br>4 | 9.00E+0<br>0 | 9.00E+0<br>0 | 9.00E+0<br>0 | 3.19944<br>8 | 0.000894 | -       | dow<br>n |
| Mad332      | N-Acetyl-5-hydroxytryptamine                 | Tryptamine derivatives         | 5.78E+0<br>3 | 4.71E+0<br>3 | 7.06E+0<br>3 | 9.00E+0<br>0 | 9.00E+0<br>0 | 9.00E+0<br>0 | 3.07581<br>9 | 0.001538 | -9.3443 | dow<br>n |
| Mad82       | L-Homocystine                                | Amino acids                    | 1.16E+0<br>5 | 3.17E+0<br>4 | 3.97E+0<br>4 | 1.33E+0<br>4 | 9.48E+0<br>3 | 1.30E+0<br>4 | 1.38454<br>6 | 0.190928 | -2.3889 | dow<br>n |
| Mad106<br>8 | 4-Hydroxybenzoic acid                        | Organic acids                  | 1.88E+0<br>5 | 1.53E+0<br>5 | 9.00E+0<br>0 | 1.19E+0<br>5 | 9.00E+0<br>0 | 9.00E+0<br>0 | 1.31573<br>8 | 0.349017 | -       | dow<br>n |
| Mad943      | 3-Hydroxy-3-methylpentane-1,5-dioic acid     | Amino acid derivatives         | 2.26E+0<br>5 | 2.92E+0<br>5 | 2.09E+0<br>5 | 9.59E+0<br>4 | 1.06E+0<br>5 | 4.35E+0<br>4 | 1.22004<br>3 | 0.337552 | -       | dow<br>n |
| Mad126<br>8 | Naringenin chalcone                          | Flavanone                      | 9.03E+0<br>3 | 9.00E+0<br>0 | 9.00E+0<br>0 | 9.00E+0<br>0 | 9.00E+0<br>0 | 9.00E+0<br>0 | 1.22837<br>0 | 0.002984 | -8.3885 | dow<br>n |
| Mad124<br>6 | Isosakuranetin-7-neohesperidoside (Poncirin) | Flavanone                      | 3.15E+0<br>5 | 1.15E+0<br>5 | 1.27E+0<br>5 | 2.21E+0<br>4 | 2.30E+0<br>4 | 1.65E+0<br>4 | 1.71237<br>9 | 0.110592 | -       | dow<br>n |
| Mad23       | $\gamma$ -aminobutyric acid                  | Organic acids                  | 3.09E+0<br>5 | 3.18E+0<br>5 | 3.15E+0<br>5 | 1.26E+0<br>5 | 2.01E+0<br>5 | 1.26E+0<br>5 | 1.01289<br>2 | 0.480892 | -       | dow<br>n |
| Mad63       | N,N-Dimethylglycine                          | Amino acid derivatives         | 2.08E+0<br>5 | 1.68E+0<br>5 | 1.52E+0<br>5 | 5.94E+0<br>4 | 1.24E+0<br>5 | 6.28E+0<br>4 | 1.00544<br>9 | 0.466288 | -       | dow<br>n |
| Mad906      | Aminomalonic acid                            | Organic acids                  | 3.48E+0<br>5 | 3.95E+0<br>5 | 3.42E+0<br>5 | 1.55E+0<br>5 | 2.48E+0<br>5 | 8.70E+0<br>4 | 1.02936<br>3 | 0.451613 | -       | dow<br>n |
| Mad115<br>5 | Genistein 7-O-Glucoside (Genistin)           | Isoflavone                     | 2.74E+0<br>4 | 1.12E+0<br>4 | 1.37E+0<br>4 | 9.00E+0<br>0 | 9.00E+0<br>0 | 9.00E+0<br>0 | 3.30817<br>6 | 0.000516 | -       | dow<br>n |
| Mad111<br>3 | Vitexin 2''-O-beta-L-rhamnoside              | Flavone C-glycosides           | 5.84E+0<br>4 | 2.37E+0<br>4 | 2.95E+0<br>4 | 1.07E+0<br>4 | 1.03E+0<br>4 | 1.21E+0<br>4 | 1.22638<br>1 | 0.296595 | -       | dow<br>n |
| Mad104<br>1 | Coniferin                                    | Hydroxycinnamoyl derivatives   | 2.57E+0<br>6 | 1.42E+0<br>6 | 1.52E+0<br>6 | 9.00E+0<br>0 | 9.00E+0<br>0 | 9.00E+0<br>0 | 4.22418<br>3 | 4.90E-06 | -       | dow<br>n |
| Mad465      | Kaempferol 3-O-galactoside (Trifolin)        | Flavonol                       | 1.37E+0<br>6 | 1.35E+0<br>6 | 1.06E+0<br>6 | 7.30E+0<br>5 | 4.90E+0<br>5 | 4.46E+0<br>5 | 1.06379<br>4 | 0.440741 | -1.182  | dow<br>n |
| Mad365      | Afzelechin (3,5,7,4'-Tetrahydroxyflavan)     | Flavanone                      | 1.12E+0<br>5 | 1.13E+0<br>5 | 9.89E+0<br>4 | 4.07E+0<br>4 | 7.14E+0<br>4 | 3.95E+0<br>4 | 1.02235<br>2 | 0.468046 | -       | dow<br>n |
| Mad125<br>4 | Morin                                        | Flavonol                       | 2.15E+0<br>5 | 1.53E+0<br>5 | 1.31E+0<br>5 | 3.30E+0<br>4 | 4.77E+0<br>4 | 3.80E+0<br>4 | 1.42247<br>5 | 0.237876 | -       | dow<br>n |
| Mad198      | Deoxyadenosine                               | Nucleotide and its derivatives | 1.36E+0<br>5 | 8.86E+0<br>4 | 9.66E+0<br>4 | 4.11E+0<br>4 | 4.58E+0<br>4 | 2.01E+0<br>4 | 1.22159<br>4 | 0.333126 | -       | dow<br>n |



|                    |                                               |                                |              |              |              |              |              |              |              |          |              |          |
|--------------------|-----------------------------------------------|--------------------------------|--------------|--------------|--------------|--------------|--------------|--------------|--------------|----------|--------------|----------|
| Mad219             | 2-(dimethylamino)guanosine                    | Nucleotide and its derivatives | 3.70E+0<br>4 | 2.73E+0<br>4 | 3.21E+0<br>4 | 1.72E+0<br>4 | 9.15E+0<br>3 | 8.61E+0<br>3 | 1.18902<br>7 | 0.362656 | -<br>1.46333 | dow<br>n |
| Mad891             | β-Pseudouridine                               | Nucleotide and its derivatives | 6.11E+0<br>4 | 4.80E+0<br>4 | 3.59E+0<br>4 | 1.95E+0<br>4 | 1.69E+0<br>4 | 1.54E+0<br>4 | 1.18484<br>9 | 0.357241 | -<br>1.48503 | dow<br>n |
| <b>PS3 vs PS4:</b> |                                               |                                | <b>PS3a</b>  | <b>PS3b</b>  | <b>PS3c</b>  | <b>PS4a</b>  | <b>PS4b</b>  | <b>PS4c</b>  |              |          |              |          |
| Mad759             | 9-Hydroxy-(10E,12Z,15Z)-octadecatrienoic acid | Lipids_Fatty acids             | 4.66E+0<br>4 | 5.18E+0<br>4 | 3.78E+0<br>4 | 1.88E+0<br>5 | 1.99E+0<br>5 | 1.76E+0<br>5 | 1.60784<br>2 | 4.133627 | 2.04740<br>8 | up       |
| Mad70              | sn-Glycero-3-phosphocholine                   | Cholines                       | 2.95E+0<br>5 | 3.07E+0<br>5 | 2.38E+0<br>5 | 6.83E+0<br>5 | 6.64E+0<br>5 | 7.35E+0<br>5 | 1.28143<br>5 | 2.478571 | 1.30950<br>9 | up       |
| Mad359             | di-C,C-hexosyl-luteolin                       | Flavone C-glycosides           | 6.66E+0<br>3 | 9.00E+0<br>0 | 2.72E+0<br>3 | 1.57E+0<br>4 | 1.22E+0<br>4 | 3.07E+0<br>3 | 1.64522      | 3.298541 | 1.72182<br>8 | up       |
| Mad699             | MAG (18:4) isomer2                            | Lipids_Glycerolipids           | 4.51E+0<br>4 | 7.12E+0<br>4 | 2.48E+0<br>4 | 1.79E+0<br>5 | 1.30E+0<br>5 | 6.86E+0<br>4 | 1.18267<br>2 | 2.676116 | 1.42014<br>1 | up       |
| Mad11              | Agmatine                                      | Phenolamides                   | 5.05E+0<br>3 | 9.00E+0<br>0 | 9.00E+0<br>0 | 9.61E+0<br>3 | 3.29E+0<br>4 | 1.58E+0<br>4 | 2.79814<br>8 | 11.50552 | 3.52425<br>5 | up       |
| Mad228             | N'-p-Coumaroyl putrescine                     | Phenolamides                   | 9.00E+0<br>0 | 9.78E+0<br>3 | 9.00E+0<br>0 | 8.09E+0<br>3 | 1.15E+0<br>4 | 9.00E+0<br>0 | 1.18123<br>2 | 2.000306 | 1.00022<br>1 | up       |
| Mad248             | Cyanidin 3-O-glucoside (Kuromanin)            | Anthocyanins                   | 2.54E+0<br>5 | 1.49E+0<br>6 | 4.00E+0<br>5 | 8.75E+0<br>6 | 7.45E+0<br>7 | 2.83E+0<br>7 | 2.57015<br>8 | 52.02892 | 5.70124<br>2 | up       |
| Mad456             | Syringetin 5-O-hexoside                       | Flavone                        | 4.38E+0<br>4 | 9.26E+0<br>4 | 1.35E+0<br>4 | 3.10E+0<br>5 | 8.69E+0<br>4 | 7.55E+0<br>4 | 1.18468      | 3.151434 | 1.65600<br>9 | up       |
| Mad493             | Syringetin 7-O-hexoside                       | Flavone                        | 2.83E+0<br>4 | 7.66E+0<br>4 | 1.20E+0<br>4 | 2.66E+0<br>5 | 4.89E+0<br>4 | 6.59E+0<br>4 | 1.13830<br>9 | 3.257485 | 1.70375<br>9 | up       |
| Mad298             | C-hexosyl-luteolin O-hexoside                 | Flavone C-glycosides           | 9.00E+0<br>0 | 9.00E+0<br>0 | 9.00E+0<br>0 | 1.16E+0<br>4 | 1.09E+0<br>4 | 9.00E+0<br>0 | 2.47747<br>4 | 833.6667 | 9.70332<br>7 | up       |
| Mad386             | Quercetin 7-O-malonylhexosyl-hexoside         | Flavonol                       | 9.00E+0<br>0 | 5.86E+0<br>3 | 9.00E+0<br>0 | 9.00E+0<br>0 | 4.10E+0<br>4 | 7.48E+0<br>4 | 1.74309<br>1 | 19.70211 | 4.30027<br>8 | up       |
| Mad430             | 5-O-p-Coumaroyl shikimic acid                 | Quinate and its derivatives    | 9.00E+0<br>0 | 9.00E+0<br>0 | 9.00E+0<br>0 | 8.63E+0<br>3 | 9.00E+0<br>0 | 9.00E+0<br>0 | 1.35818<br>6 | 320.2963 | 8.32326<br>3 | up       |
| Mad585             | N-Feruloyl tyramine                           | Phenolamides                   | 9.00E+0<br>0 | 9.00E+0<br>0 | 9.00E+0<br>0 | 9.00E+0<br>0 | 9.00E+0<br>0 | 1.34E+0<br>4 | 1.41577<br>8 | 496.963  | 8.95699<br>5 | up       |
| Mad100             | Piperidine                                    | Alkaloids                      | 1.29E+0<br>6 | 8.42E+0<br>5 | 8.38E+0<br>5 | 2.29E+0<br>6 | 4.48E+0<br>6 | 3.98E+0<br>6 | 1.47073<br>1 | 3.619529 | 1.85580<br>2 | up       |
| Mad235             | Methoxyindoleacetic acid                      | Indole derivatives             | 1.69E+0<br>4 | 2.90E+0<br>4 | 2.24E+0<br>4 | 6.93E+0<br>4 | 3.99E+0<br>4 | 3.74E+0<br>4 | 1.06403<br>2 | 2.146413 | 1.10192<br>8 | up       |
| Mad745             | LysoPC 18:3                                   | Lipids_Glycerophospholipids    | 2.61E+0<br>5 | 3.32E+0<br>5 | 5.81E+0<br>5 | 1.40E+0<br>6 | 1.28E+0<br>6 | 9.16E+0<br>5 | 1.38912<br>6 | 3.063032 | 1.61496<br>1 | up       |
| Mad746             | LysoPC 16:0                                   | Lipids_Glycerophospholipids    | 1.47E+0<br>6 | 1.85E+0<br>6 | 3.41E+0<br>6 | 6.75E+0<br>6 | 6.89E+0<br>6 | 5.15E+0<br>6 | 1.33461<br>4 | 2.791976 | 1.48128<br>7 | up       |
| Mad704             | LysoPC 16:2 (2n isomer)                       | Lipids_Glycerophospholipids    | 2.92E+0<br>4 | 4.13E+0<br>4 | 3.86E+0<br>4 | 1.02E+0<br>5 | 8.56E+0<br>4 | 9.19E+0<br>4 | 1.29808<br>9 | 2.56187  | 1.35719<br>7 | up       |
| Mad715             | LysoPE 14:0                                   | Lipids_Glycerophospholipids    | 2.63E+0<br>3 | 2.57E+0<br>3 | 3.89E+0<br>3 | 1.01E+0<br>4 | 1.18E+0<br>4 | 8.77E+0<br>3 | 1.47581<br>3 | 3.374037 | 1.75447<br>6 | up       |
| Mad719             | LysoPC 14:0                                   | Lipids_Glycerophospholipids    | 1.43E+0<br>4 | 1.29E+0<br>4 | 2.06E+0<br>4 | 5.84E+0<br>4 | 7.32E+0<br>4 | 4.60E+0<br>4 | 1.52047<br>6 | 3.715481 | 1.89354<br>9 | up       |
| Mad765             | LysoPE 18:0                                   | Lipids_Glycerophospholipids    | 6.88E+0<br>3 | 8.20E+0<br>3 | 1.29E+0<br>4 | 2.46E+0<br>4 | 3.35E+0<br>4 | 2.51E+0<br>4 | 1.38337<br>1 | 2.973553 | 1.57218<br>8 | up       |
| Mad751             | Punicic acid                                  | Lipids_Fatty acids             | 7.20E+0<br>4 | 7.26E+0<br>4 | 6.14E+0<br>4 | 2.47E+0<br>5 | 2.65E+0<br>5 | 2.54E+0<br>5 | 1.54900<br>2 | 3.718447 | 1.8947       | up       |
| Mad771             | MAG (18:2)                                    | Lipids_Glycerolipids           | 1.98E+0<br>5 | 2.70E+0<br>5 | 1.59E+0<br>5 | 8.37E+0<br>5 | 1.17E+0<br>6 | 9.95E+0<br>5 | 1.67946<br>1 | 4.787879 | 2.25938<br>7 | up       |

|             |                                          |                                |              |              |              |              |              |              |              |          |              |    |
|-------------|------------------------------------------|--------------------------------|--------------|--------------|--------------|--------------|--------------|--------------|--------------|----------|--------------|----|
| Mad217      | trans-zeatin N-glucoside                 | Phytohormones                  | 3.40E+0<br>5 | 4.66E+0<br>5 | 3.73E+0<br>5 | 1.39E+0<br>6 | 7.70E+0<br>5 | 6.34E+0<br>5 | 1.12142<br>5 | 2.369805 | 1.24476<br>8 | up |
| Mad241      | Indole                                   | Indole derivatives             | 9.00E+0<br>0 | 9.00E+0<br>0 | 3.40E+0<br>3 | 3.92E+0<br>3 | 6.69E+0<br>3 | 8.13E+0<br>3 | 2.49782<br>1 | 5.482738 | 2.45489<br>7 | up |
| Mad420      | Phellodensin F                           | Others                         | 4.11E+0<br>3 | 9.00E+0<br>0 | 9.00E+0<br>0 | 6.84E+0<br>3 | 9.00E+0<br>0 | 7.38E+0<br>3 | 1.27026      | 3.446948 | 1.78531<br>9 | up |
| Mad46       | O-Phosphocholine                         | Cholines                       | 1.47E+0<br>4 | 1.30E+0<br>4 | 8.88E+0<br>3 | 1.82E+0<br>4 | 2.91E+0<br>4 | 3.48E+0<br>4 | 1.11386<br>8 | 2.244396 | 1.16632<br>7 | up |
| Mad730      | MAG (18:3) isomer2                       | Lipids_Glycerolipids           | 5.51E+0<br>3 | 7.84E+0<br>3 | 7.99E+0<br>3 | 1.94E+0<br>4 | 2.10E+0<br>4 | 1.40E+0<br>4 | 1.26692<br>3 | 2.549203 | 1.35004<br>6 | up |
| Mad761      | LysoPC 17:0                              | Lipids_Glycerophospholipids    | 2.73E+0<br>4 | 2.40E+0<br>4 | 5.91E+0<br>4 | 1.66E+0<br>5 | 2.52E+0<br>5 | 1.89E+0<br>5 | 1.75347<br>1 | 5.498188 | 2.45895<br>6 | up |
| Mad768      | MAG (18:3) isomer1                       | Lipids_Glycerolipids           | 2.75E+0<br>5 | 1.80E+0<br>5 | 1.50E+0<br>5 | 5.04E+0<br>5 | 2.60E+0<br>5 | 4.96E+0<br>5 | 1.01932<br>4 | 2.082645 | 1.05841<br>7 | up |
| Mad788      | 4-Hydroxy-3-methoxymandelate             | Organic acids                  | 1.72E+0<br>4 | 1.43E+0<br>4 | 7.01E+0<br>3 | 4.73E+0<br>4 | 3.86E+0<br>4 | 3.10E+0<br>4 | 1.37420<br>5 | 3.035575 | 1.60197      | up |
| Mad109<br>6 | 4-hydroxycoumarin di-glucoside           | Coumarins                      | 9.00E+0<br>0 | 9.00E+0<br>0 | 9.00E+0<br>0 | 2.00E+0<br>4 | 1.47E+0<br>5 | 1.26E+0<br>5 | 4.03781<br>1 | 10851.85 | 13.4056<br>5 | up |
| Mad134<br>7 | 9,10-EODE                                | Lipids_Fatty acids             | 9.99E+0<br>4 | 9.93E+0<br>4 | 8.53E+0<br>4 | 3.27E+0<br>5 | 3.87E+0<br>5 | 3.44E+0<br>5 | 1.54631<br>7 | 3.718805 | 1.89483<br>9 | up |
| Mad134<br>9 | 9-KODE                                   | Lipids_Fatty acids             | 6.38E+0<br>3 | 6.37E+0<br>3 | 9.00E+0<br>0 | 1.87E+0<br>4 | 1.60E+0<br>4 | 9.97E+0<br>3 | 1.75511<br>1 | 3.501058 | 1.80779<br>1 | up |
| Mad133<br>9 | 13-HpOTrE(r)                             | Lipids_Fatty acids             | 2.35E+0<br>3 | 3.48E+0<br>3 | 2.72E+0<br>3 | 6.26E+0<br>3 | 1.08E+0<br>4 | 7.54E+0<br>3 | 1.33842      | 2.877193 | 1.52466<br>2 | up |
| Mad135<br>2 | 12,13-EODE                               | Lipids_Fatty acids             | 1.99E+0<br>3 | 1.23E+0<br>3 | 9.00E+0<br>0 | 6.77E+0<br>3 | 8.22E+0<br>3 | 7.01E+0<br>3 | 2.02033<br>6 | 6.813255 | 2.76834<br>4 | up |
| Mad133<br>8 | 13-HPODE                                 | Lipids_Fatty acids             | 3.16E+0<br>3 | 3.66E+0<br>3 | 3.07E+0<br>3 | 1.04E+0<br>4 | 1.38E+0<br>4 | 1.12E+0<br>4 | 1.51639<br>8 | 3.579373 | 1.83970<br>7 | up |
| Mad861      | Citramalate                              | Organic acids                  | 1.29E+0<br>7 | 9.44E+0<br>6 | 6.65E+0<br>6 | 1.84E+0<br>7 | 2.89E+0<br>7 | 2.61E+0<br>7 | 1.24688<br>6 | 2.531908 | 1.34022<br>5 | up |
| Mad124<br>0 | Disinapoyl hexoside                      | Hydroxycinnamoyl derivatives   | 9.00E+0<br>0 | 9.00E+0<br>0 | 9.00E+0<br>0 | 1.05E+0<br>4 | 3.02E+0<br>4 | 2.89E+0<br>4 | 3.76119<br>3 | 2577.778 | 11.3319<br>1 | up |
| Mad101<br>7 | Cyanidin O-syringic acid                 | Anthocyanins                   | 9.00E+0<br>0 | 3.43E+0<br>5 | 6.33E+0<br>4 | 1.47E+0<br>6 | 2.74E+0<br>7 | 6.00E+0<br>6 | 3.03255<br>7 | 85.82138 | 6.42326<br>5 | up |
| Mad113<br>0 | Tricin O-saccharic acid                  | Flavone                        | 1.42E+0<br>4 | 1.57E+0<br>4 | 9.00E+0<br>0 | 1.15E+0<br>5 | 1.35E+0<br>4 | 7.41E+0<br>3 | 1.58934<br>5 | 4.544117 | 2.184        | up |
| Mad107<br>7 | 3-O-p-coumaroyl shikimic acid O-hexoside | Quinate and its derivatives    | 1.39E+0<br>4 | 1.37E+0<br>4 | 1.15E+0<br>4 | 2.50E+0<br>4 | 8.95E+0<br>4 | 2.99E+0<br>4 | 1.30760<br>3 | 3.693095 | 1.88483      | up |
| Mad848      | Trehalose 6-phosphate                    | Carbohydrates                  | 9.00E+0<br>0 | 6.47E+0<br>4 | 3.61E+0<br>4 | 6.96E+0<br>4 | 7.20E+0<br>4 | 7.54E+0<br>4 | 1.72067<br>4 | 2.152586 | 1.10607<br>1 | up |
| Mad104<br>8 | 2-Isopropylmalate                        | Organic acids                  | 1.66E+0<br>5 | 2.07E+0<br>5 | 1.75E+0<br>5 | 3.15E+0<br>5 | 3.99E+0<br>5 | 4.47E+0<br>5 | 1.13891<br>5 | 2.118613 | 1.08312      | up |
| Mad874      | Guanosine 5'-monophosphate               | Nucleotide and its derivatives | 2.58E+0<br>4 | 2.40E+0<br>4 | 2.78E+0<br>4 | 7.94E+0<br>4 | 5.20E+0<br>4 | 5.50E+0<br>4 | 1.22257      | 2.402062 | 1.26427<br>3 | up |
| Mad713      | LysoPC 14:0 (2n isomer)                  | Lipids_Glycerophospholipids    | 2.84E+0<br>4 | 2.35E+0<br>4 | 3.89E+0<br>4 | 1.04E+0<br>5 | 1.41E+0<br>5 | 8.96E+0<br>4 | 1.51510<br>9 | 3.685022 | 1.88167<br>3 | up |
| Mad741      | LysoPC 16:0 (2n isomer)                  | Lipids_Glycerophospholipids    | 1.58E+0<br>6 | 1.85E+0<br>6 | 3.32E+0<br>6 | 7.10E+0<br>6 | 7.10E+0<br>6 | 5.70E+0<br>6 | 1.38149<br>8 | 2.948148 | 1.55980<br>9 | up |
| Mad764      | LysoPC 18:0                              | Lipids_Glycerophospholipids    | 2.30E+0<br>5 | 2.24E+0<br>5 | 4.73E+0<br>5 | 1.27E+0<br>6 | 1.47E+0<br>6 | 1.22E+0<br>6 | 1.62252<br>4 | 4.271845 | 2.09485<br>9 | up |

|             |                                          |                              |              |              |              |              |              |              |              |          |              |    |
|-------------|------------------------------------------|------------------------------|--------------|--------------|--------------|--------------|--------------|--------------|--------------|----------|--------------|----|
| Mad812      | L-Aspartic acid                          | Amino acids                  | 4.62E+0<br>6 | 4.84E+0<br>6 | 2.87E+0<br>6 | 7.70E+0<br>6 | 1.14E+0<br>7 | 1.23E+0<br>7 | 1.24904<br>4 | 2.546634 | 1.34859<br>2 | up |
| Mad813      | L-Glutamic acid                          | Amino acids                  | 3.28E+0<br>6 | 5.22E+0<br>6 | 2.93E+0<br>6 | 6.68E+0<br>6 | 1.08E+0<br>7 | 8.77E+0<br>6 | 1.169        | 2.296588 | 1.19949<br>2 | up |
| Mad794      | 2-Aminoethanesulfonic acid               | Organic acids                | 1.07E+0<br>4 | 1.02E+0<br>4 | 2.91E+0<br>3 | 1.82E+0<br>4 | 2.29E+0<br>4 | 1.68E+0<br>4 | 1.19864<br>8 | 2.431751 | 1.28199<br>6 | up |
| Mad781      | L-Histidine                              | Amino acids                  | 1.80E+0<br>4 | 2.54E+0<br>4 | 2.22E+0<br>4 | 3.28E+0<br>4 | 7.41E+0<br>4 | 4.85E+0<br>4 | 1.12860<br>9 | 2.368902 | 1.24421<br>9 | up |
| Mad35       | 5-Aminovaleric acid                      | Amino acid derivatives       | 6.71E+0<br>3 | 9.00E+0<br>0 | 5.14E+0<br>3 | 1.76E+0<br>4 | 1.27E+0<br>4 | 1.65E+0<br>4 | 1.83560<br>4 | 3.94637  | 1.98052<br>6 | up |
| Mad111<br>5 | Quercetin 3-O-rutinoside (Rutin)         | Flavonol                     | 9.16E+0<br>5 | 1.82E+0<br>6 | 1.24E+0<br>6 | 7.26E+0<br>5 | 5.30E+0<br>6 | 1.39E+0<br>7 | 1.02098<br>7 | 5.011569 | 2.32526<br>2 | up |
| Mad969      | Glutaric acid                            | Organic acids                | 9.98E+0<br>5 | 9.39E+0<br>5 | 7.46E+0<br>5 | 1.85E+0<br>6 | 1.94E+0<br>6 | 2.17E+0<br>6 | 1.19448<br>5 | 2.221394 | 1.15146<br>5 | up |
| Mad111<br>2 | N-Acetyl-L-leucine                       | Amino acid derivatives       | 2.40E+0<br>4 | 2.32E+0<br>4 | 1.86E+0<br>4 | 5.55E+0<br>4 | 7.44E+0<br>4 | 9.59E+0<br>4 | 1.46192<br>4 | 3.431611 | 1.77888<br>6 | up |
| Mad991      | 2-Methylsuccinic acid                    | Organic acids                | 1.26E+0<br>6 | 1.30E+0<br>6 | 1.15E+0<br>6 | 2.63E+0<br>6 | 2.83E+0<br>6 | 3.20E+0<br>6 | 1.23663<br>1 | 2.334232 | 1.22294<br>8 | up |
| Mad93       | 6-Aminocaproic acid                      | Organic acids                | 5.50E+0<br>6 | 4.08E+0<br>6 | 4.15E+0<br>6 | 9.19E+0<br>6 | 1.45E+0<br>7 | 1.41E+0<br>7 | 1.31653<br>1 | 2.752367 | 1.46067<br>3 | up |
| Mad114<br>7 | Kaempferol 3-O-rutinoside (Nicotiflorin) | Flavonol                     | 4.78E+0<br>4 | 3.29E+0<br>4 | 6.93E+0<br>4 | 4.82E+0<br>4 | 1.44E+0<br>5 | 3.37E+0<br>5 | 1.10517<br>6 | 3.528    | 1.81885<br>1 | up |
| Mad624      | Naringenin                               | Flavanone                    | 9.00E+0<br>0 | 9.00E+0<br>0 | 9.00E+0<br>0 | 9.00E+0<br>0 | 1.28E+0<br>4 | 9.00E+0<br>0 | 1.41504<br>1 | 474.7407 | 8.89099<br>6 | up |
| Mad362      | Homovanillic acid                        | Hydroxycinnamoyl derivatives | 9.00E+0<br>0 | 2.84E+0<br>4 | 2.00E+0<br>4 | 3.13E+0<br>4 | 6.02E+0<br>4 | 5.27E+0<br>4 | 1.78792<br>8 | 2.978785 | 1.57472<br>4 | up |
| Mad118<br>2 | 3-Hydroxy-4-methoxycinnamic acid         | Hydroxycinnamoyl derivatives | 9.00E+0<br>0 | 9.00E+0<br>0 | 9.00E+0<br>0 | 1.37E+0<br>4 | 9.00E+0<br>0 | 9.00E+0<br>0 | 1.40315<br>3 | 508.0741 | 8.98889<br>5 | up |
| Mad4        | Gluconic acid                            | Carbohydrates                | 9.00E+0<br>0 | 9.00E+0<br>0 | 9.00E+0<br>0 | 9.00E+0<br>0 | 9.00E+0<br>0 | 1.66E+0<br>4 | 1.43637<br>8 | 615.4815 | 9.26557<br>2 | up |
| Mad180      | Deoxyguanosine                           | Nucleotide and its derivates | 9.00E+0<br>0 | 9.00E+0<br>0 | 9.00E+0<br>0 | 2.99E+0<br>4 | 1.48E+0<br>4 | 9.00E+0<br>0 | 2.58133<br>7 | 1655.889 | 10.6933<br>9 | up |
| Mad960      | Xanthosine                               | Nucleotide and its derivates | 1.02E+0<br>4 | 1.57E+0<br>4 | 9.00E+0<br>0 | 3.04E+0<br>4 | 1.71E+0<br>4 | 1.56E+0<br>4 | 1.63209<br>2 | 2.435447 | 1.28418<br>7 | up |
| Mad798      | L-Glutamine                              | Amino acids                  | 3.80E+0<br>4 | 7.40E+0<br>4 | 1.64E+0<br>4 | 7.64E+0<br>4 | 1.07E+0<br>5 | 1.01E+0<br>5 | 1.13345      | 2.214953 | 1.14727<br>6 | up |
| Mad113<br>5 | Kaempferol 3-O-robinobioside (Biorobin)  | Flavonol                     | 5.35E+0<br>4 | 2.71E+0<br>4 | 6.17E+0<br>4 | 5.00E+0<br>4 | 1.48E+0<br>5 | 3.72E+0<br>5 | 1.18841<br>1 | 4.005622 | 2.00202<br>6 | up |
| Mad218      | D-Pantothenic acid                       | Organic acids                | 2.42E+0<br>3 | 9.00E+0<br>0 | 2.54E+0<br>3 | 7.37E+0<br>3 | 3.31E+0<br>3 | 3.58E+0<br>3 | 1.56770<br>7 | 2.869793 | 1.52094<br>7 | up |
| Mad988      | 3-Hydroxy-3-methyl butyric acid          | Organic acids                | 1.57E+0<br>4 | 2.06E+0<br>4 | 9.00E+0<br>0 | 7.21E+0<br>4 | 2.73E+0<br>4 | 3.90E+0<br>4 | 1.84766<br>6 | 3.811727 | 1.93044<br>5 | up |
| Mad80       | Betaine                                  | Alkaloids                    | 9.63E+0<br>4 | 1.28E+0<br>5 | 1.10E+0<br>5 | 2.71E+0<br>5 | 2.99E+0<br>5 | 2.01E+0<br>5 | 1.19632<br>2 | 2.306312 | 1.20558<br>8 | up |
| Mad909      | L-(+)-Tartaric acid                      | Organic acids                | 3.05E+0<br>5 | 2.19E+0<br>5 | 1.35E+0<br>5 | 4.44E+0<br>5 | 5.18E+0<br>5 | 5.13E+0<br>5 | 1.16854<br>4 | 2.23824  | 1.16236<br>5 | up |
| Mad221      | Theobromine                              | Alkaloids                    | 5.07E+0<br>3 | 9.00E+0<br>0 | 6.54E+0<br>3 | 1.38E+0<br>4 | 5.73E+0<br>3 | 4.46E+0<br>3 | 1.43619<br>9 | 2.064722 | 1.04594<br>7 | up |
| Mad72       | Trigonelline                             | Alkaloids                    | 5.34E+0<br>5 | 3.58E+0<br>5 | 2.15E+0<br>5 | 2.55E+0<br>6 | 2.11E+0<br>6 | 1.26E+0<br>6 | 1.70023<br>3 | 5.347787 | 2.41894<br>2 | up |

|             |                                               |                                 |              |              |              |              |              |              |              |          |              |          |
|-------------|-----------------------------------------------|---------------------------------|--------------|--------------|--------------|--------------|--------------|--------------|--------------|----------|--------------|----------|
| Mad7        | Putrescine                                    | Phenolamides                    | 2.58E+0<br>5 | 5.10E+0<br>5 | 1.56E+0<br>5 | 1.29E+0<br>6 | 8.59E+0<br>5 | 3.96E+0<br>5 | 1.15869<br>3 | 2.754329 | 1.46170<br>1 | up       |
| Mad332      | N-Acetyl-5-hydroxytryptamine                  | Tryptamine derivatives          | 9.00E+0<br>0 | 9.00E+0<br>0 | 9.00E+0<br>0 | 9.00E+0<br>0 | 8.57E+0<br>3 | 9.00E+0<br>0 | 1.37538<br>8 | 318.0741 | 8.31321<br>9 | up       |
| Mad106<br>8 | 4-Hydroxybenzoic acid                         | Organic acids                   | 1.19E+0<br>5 | 9.00E+0<br>0 | 9.00E+0<br>0 | 9.00E+0<br>0 | 2.43E+0<br>5 | 2.00E+0<br>5 | 1.54676<br>3 | 3.722202 | 1.89615<br>6 | up       |
| Mad126<br>8 | Naringenin chalcone                           | Flavanone                       | 9.00E+0<br>0 | 9.00E+0<br>0 | 9.00E+0<br>0 | 9.00E+0<br>0 | 1.70E+0<br>4 | 6.75E+0<br>3 | 2.4783       | 879.963  | 9.78129<br>9 | up       |
| Mad830      | Uridine 5'-diphosphate                        | Nucleotide and its<br>derivates | 1.60E+0<br>5 | 1.21E+0<br>5 | 1.55E+0<br>5 | 3.42E+0<br>5 | 2.79E+0<br>5 | 2.60E+0<br>5 | 1.10387<br>2 | 2.020642 | 1.01481<br>4 | up       |
| Mad987      | ethylmalonate                                 | Organic acids                   | 9.15E+0<br>3 | 9.00E+0<br>0 | 1.38E+0<br>4 | 1.87E+0<br>4 | 1.81E+0<br>4 | 3.14E+0<br>4 | 1.73849<br>2 | 2.970513 | 1.57071<br>2 | up       |
| Mad115<br>5 | Genistein 7-O-Glucoside (Genistin)            | Isoflavone                      | 9.00E+0<br>0 | 9.00E+0<br>0 | 9.00E+0<br>0 | 9.00E+0<br>0 | 7.98E+0<br>3 | 9.00E+0<br>0 | 1.36821<br>8 | 296.2222 | 8.21053<br>6 | up       |
| Mad104<br>1 | Coniferin                                     | Hydroxycinnamoyl<br>derivatives | 9.00E+0<br>0 | 9.00E+0<br>0 | 9.00E+0<br>0 | 9.00E+0<br>0 | 9.00E+0<br>0 | 6.49E+0<br>5 | 1.75185<br>7 | 24037.7  | 14.5530<br>1 | up       |
| Mad105<br>1 | Pantetheine                                   | Vitamins                        | 5.66E+0<br>3 | 9.00E+0<br>0 | 9.00E+0<br>0 | 9.00E+0<br>0 | 6.85E+0<br>3 | 5.95E+0<br>3 | 1.18863<br>4 | 2.2559   | 1.17370<br>3 | up       |
| Mad123<br>0 | Formononetin 7-O-glucoside (Ononin)           | Isoflavone                      | 9.06E+0<br>3 | 7.12E+0<br>3 | 8.62E+0<br>3 | 9.67E+0<br>4 | 3.66E+0<br>4 | 2.77E+0<br>4 | 1.69485      | 6.491935 | 2.69864<br>9 | up       |
| Mad122<br>5 | E-3,4,5'-Trihydroxy-3'-glucopyranosylstilbene | Others                          | 8.14E+0<br>3 | 9.00E+0<br>0 | 9.00E+0<br>0 | 9.00E+0<br>0 | 9.00E+0<br>0 | 9.00E+0<br>0 | 1.36405<br>1 | 0.00331  | -<br>8.23911 | dow<br>n |
| Mad97       | Xanthine                                      | Nucleotide and its<br>derivates | 9.00E+0<br>0 | 3.07E+0<br>3 | 3.57E+0<br>3 | 9.00E+0<br>0 | 9.00E+0<br>0 | 9.00E+0<br>0 | 2.25702<br>4 | 0.004061 | -<br>7.94403 | dow<br>n |
| Mad690      | Azoxystrobin acid                             | Others                          | 1.18E+0<br>5 | 1.35E+0<br>5 | 1.78E+0<br>5 | 4.63E+0<br>4 | 4.35E+0<br>4 | 3.83E+0<br>4 | 1.46526<br>3 | 0.297216 | -<br>1.75042 | dow<br>n |
| Mad141      | L-Leucine                                     | Amino acids                     | 4.79E+0<br>6 | 4.74E+0<br>6 | 5.98E+0<br>6 | 9.00E+0<br>0 | 9.00E+0<br>0 | 9.00E+0<br>0 | 4.92612<br>1 | 1.74E-06 | -<br>19.1318 | dow<br>n |
| Mad121      | γ-Glu-Cys                                     | Amino acid derivatives          | 6.67E+0<br>3 | 9.76E+0<br>3 | 9.00E+0<br>0 | 9.00E+0<br>0 | 9.00E+0<br>0 | 4.09E+0<br>3 | 1.31632<br>8 | 0.249894 | -<br>2.0061  | dow<br>n |
| Mad66       | Glycyl-L-proline                              | Amino acid derivatives          | 3.90E+0<br>3 | 4.78E+0<br>3 | 3.68E+0<br>3 | 4.74E+0<br>3 | 9.00E+0<br>0 | 9.00E+0<br>0 | 2.27279<br>2 | 0.384951 | -<br>1.37725 | dow<br>n |
| Mad121<br>5 | Benzoic acid                                  | Benzoic acid derivatives        | 2.58E+0<br>5 | 2.39E+0<br>5 | 3.41E+0<br>5 | 1.37E+0<br>5 | 1.10E+0<br>5 | 1.41E+0<br>5 | 1.14895<br>4 | 0.463007 | -<br>1.11089 | dow<br>n |
| Mad102<br>3 | Adipic acid                                   | Organic acids                   | 1.16E+0<br>5 | 5.12E+0<br>4 | 1.26E+0<br>5 | 5.40E+0<br>4 | 3.40E+0<br>4 | 3.86E+0<br>4 | 1.05681<br>6 | 0.431787 | -<br>1.21161 | dow<br>n |
| Mad117<br>0 | Ferulic acid                                  | Hydroxycinnamoyl<br>derivatives | 9.00E+0<br>0 | 2.18E+0<br>4 | 9.00E+0<br>0 | 9.00E+0<br>0 | 9.00E+0<br>0 | 9.00E+0<br>0 | 1.46378<br>9 | 0.001238 | -<br>9.65834 | dow<br>n |
| Mad108      | Nicotinic acid                                | Nicotinic acid derivatives      | 1.35E+0<br>4 | 3.04E+0<br>4 | 9.00E+0<br>0 | 9.00E+0<br>0 | 1.69E+0<br>4 | 9.00E+0<br>0 | 1.28565<br>9 | 0.385297 | -<br>1.37596 | dow<br>n |
| Mad915      | S-(methyl)glutathione                         | Amino acid derivatives          | 5.34E+0<br>4 | 5.27E+0<br>4 | 4.66E+0<br>4 | 2.92E+0<br>4 | 1.72E+0<br>4 | 1.24E+0<br>4 | 1.29243<br>2 | 0.385069 | -<br>1.37681 | dow<br>n |
| Mad137      | Pyridoxine 5'-phosphate                       | Vitamins                        | 2.94E+0<br>4 | 1.88E+0<br>4 | 2.83E+0<br>4 | 1.92E+0<br>4 | 9.00E+0<br>0 | 1.86E+0<br>4 | 1.59193<br>1 | 0.494235 | -<br>1.01673 | dow<br>n |
| Mad53       | L-Saccharopine                                | Amino acid derivatives          | 4.58E+0<br>5 | 7.55E+0<br>5 | 8.24E+0<br>5 | 2.56E+0<br>5 | 1.77E+0<br>5 | 3.25E+0<br>5 | 1.26805      | 0.372116 | -<br>1.42618 | dow<br>n |
| Mad43       | L-Carnitine                                   | Others                          | 4.77E+0<br>4 | 5.07E+0<br>4 | 4.70E+0<br>4 | 9.00E+0<br>0 | 3.41E+0<br>4 | 3.10E+0<br>4 | 1.67622<br>1 | 0.447792 | -1.1591      | dow<br>n |
| Mad139      | Orotic acid                                   | Vitamins                        | 4.66E+0<br>4 | 5.95E+0<br>4 | 6.63E+0<br>4 | 5.10E+0<br>4 | 9.00E+0<br>0 | 3.48E+0<br>4 | 1.66929<br>2 | 0.497732 | -<br>1.00656 | dow<br>n |

|             |                          |                                 |              |              |              |              |              |              |              |          |   |          |
|-------------|--------------------------|---------------------------------|--------------|--------------|--------------|--------------|--------------|--------------|--------------|----------|---|----------|
| Mad9        | trans-Citridic acid      | Organic acids                   | 4.44E+0<br>5 | 6.42E+0<br>5 | 6.40E+0<br>5 | 2.31E+0<br>5 | 2.01E+0<br>5 | 2.91E+0<br>5 | 1.2193       | 0.418888 | - | dow<br>n |
| Mad114<br>2 | Sinapyl alcohol          | Hydroxycinnamoyl<br>derivatives | 9.19E+0<br>3 | 5.45E+0<br>3 | 9.00E+0<br>0 | 9.00E+0<br>0 | 9.00E+0<br>0 | 4.29E+0<br>3 | 1.26877<br>6 | 0.294082 | - | dow<br>n |
| Mad778      | trans,trans-Muconic acid | Organic acids                   | 1.25E+0<br>6 | 9.25E+0<br>5 | 7.81E+0<br>5 | 2.48E+0<br>5 | 3.63E+0<br>5 | 6.08E+0<br>5 | 1.20189<br>5 | 0.412382 | - | dow<br>n |

**Table 4.** KEGG pathway assignments of differentially accumulated metabolites among PS1 vs PS2, PS2 vs PS3, and PS3 vs PS4, respectively.

| #Kegg_pathway                           | ko_id       | Cluter_frequency                  | Genome_frequency                   | P-value         | Corrected_P-value |
|-----------------------------------------|-------------|-----------------------------------|------------------------------------|-----------------|-------------------|
| <b>PS1 vs PS2_KEGG_stat</b>             |             |                                   |                                    |                 |                   |
| Flavonoid biosynthesis                  | ko0094<br>1 | 13 out of 53<br>24.5283018867925% | 21 out of 221<br>9.50226244343891% | 0.00010348<br>5 | 0.0081753         |
| Biosynthesis of phenylpropanoids        | ko0106<br>1 | 15 out of 53<br>28.3018867924528% | 28 out of 221<br>12.6696832579186% | 0.00027082<br>9 | 0.0213955         |
| Degradation of aromatic compounds       | ko0122<br>0 | 5 out of 53 9.43396226415094%     | 9 out of 221 4.07239819004525%     | 0.03812386<br>7 | 1                 |
| Linoleic acid metabolism                | ko0059<br>1 | 2 out of 53 3.77358490566038%     | 2 out of 221<br>0.904977375565611% | 0.05668449<br>2 | 1                 |
| alpha-Linolenic acid metabolism         | ko0059<br>2 | 2 out of 53 3.77358490566038%     | 2 out of 221<br>0.904977375565611% | 0.05668449<br>2 | 1                 |
| Phenylpropanoid biosynthesis            | ko0094<br>0 | 7 out of 53 13.2075471698113%     | 16 out of 221<br>7.23981900452489% | 0.05833098<br>3 | 1                 |
| Isoflavonoid biosynthesis               | ko0094<br>3 | 7 out of 53 13.2075471698113%     | 16 out of 221<br>7.23981900452489% | 0.05833098<br>3 | 1                 |
| Biosynthesis of secondary metabolites   | ko0094<br>3 | 7 out of 53 13.2075471698113%     | 16 out of 221<br>7.23981900452489% | 0.05833098<br>3 | 1                 |
| Benzoate degradation                    | ko0094<br>3 | 7 out of 53 13.2075471698113%     | 16 out of 221<br>7.23981900452489% | 0.05833098<br>3 | 1                 |
| Tyrosine metabolism                     | ko0094<br>3 | 7 out of 53 13.2075471698113%     | 16 out of 221<br>7.23981900452489% | 0.05833098<br>3 | 1                 |
| Biosynthesis of unsaturated fatty acids | ko0094<br>3 | 7 out of 53 13.2075471698113%     | 16 out of 221<br>7.23981900452489% | 0.05833098<br>3 | 1                 |
| Rheumatoid arthritis                    | ko0094<br>3 | 7 out of 53 13.2075471698113%     | 16 out of 221<br>7.23981900452489% | 0.05833098<br>3 | 1                 |
| Benzoic acid family                     | ko0094<br>3 | 7 out of 53 13.2075471698113%     | 16 out of 221<br>7.23981900452489% | 0.05833098<br>3 | 1                 |
| Fatty acid degradation                  | ko0094<br>3 | 7 out of 53 13.2075471698113%     | 16 out of 221<br>7.23981900452489% | 0.05833098<br>3 | 1                 |
| Anthocyanin biosynthesis                | ko0094<br>3 | 7 out of 53 13.2075471698113%     | 16 out of 221<br>7.23981900452489% | 0.05833098<br>3 | 1                 |
| Styrene degradation                     | ko0094<br>3 | 7 out of 53 13.2075471698113%     | 16 out of 221<br>7.23981900452489% | 0.05833098<br>3 | 1                 |

|                                                     |             |                                    |                                    |                          |   |
|-----------------------------------------------------|-------------|------------------------------------|------------------------------------|--------------------------|---|
| Renal cell carcinoma                                | ko0521<br>1 | 1 out of 53 1.88679245283019%      | 1 out of 221<br>0.452488687782805% | 0.23981900<br>5          | 1 |
| Ubiquinone and other terpenoid-quinone biosynthesis | ko0013<br>0 | 2 out of 53 3.77358490566038%      | 4 out of 221 1.80995475113122%     | 0.24358587<br>8          | 1 |
| Toluene degradation                                 | ko0062<br>3 | 2 out of 53 3.77358490566038%      | 4 out of 221 1.80995475113122%     | 0.24358587<br>8          | 1 |
| Purine metabolism                                   | ko0023<br>0 | 6 out of 53 11.3207547169811%      | 19 out of 221 8.5972850678733%     | 0.28828480<br>7          | 1 |
| Phenylalanine metabolism                            | ko0036<br>0 | 3 out of 53 5.66037735849057%      | 9 out of 221 4.07239819004525%     | 0.37025254<br>8          | 1 |
| Folate biosynthesis                                 | ko0079<br>0 | 1 out of 53 1.88679245283019%      | 2 out of 221<br>0.904977375565611% | 0.42295351<br>7          | 1 |
| Steroid biosynthesis                                | ko0010<br>0 | 1 out of 53 1.88679245283019%      | 2 out of 221<br>0.904977375565611% | 0.42295351<br>7          | 1 |
| Bisphenol degradation                               | ko0036<br>3 | 1 out of 53 1.88679245283019%      | 2 out of 221<br>0.904977375565611% | 0.42295351<br>7          | 1 |
| Longevity regulating pathway - worm                 | ko0421<br>2 | 1 out of 53 1.88679245283019%      | 2 out of 221<br>0.904977375565611% | 0.42295351<br>7          | 1 |
| Flavone and flavonol biosynthesis                   | ko0094<br>4 | 14 out of 221<br>6.33484162895928% | 15 out of 221<br>6.78733031674208% | 0.44353927<br>8          | 1 |
| Biosynthesis of plant hormones                      | ko0107<br>0 | 4 out of 53 7.54716981132075%      | 7 out of 221<br>0.904977375565611% | 0.50466255<br>7          | 1 |
| Pentose phosphate pathway                           | ko0003<br>0 | 4 out of 53 7.54716981132075%      | 3 out of 221 1.35746606334842%     | 0.56260403<br>6          | 1 |
| Pyruvate metabolism                                 | ko0062<br>0 | 1 out of 53 1.88679245283019%      | 3 out of 221 1.35746606334842%     | 0.56260403<br>6          | 1 |
| Caffeine metabolism                                 | ko0023<br>2 | 1 out of 53 1.88679245283019%      | 3 out of 221 1.35746606334842%     | 0.56260403<br>6          | 1 |
| Choline metabolism in cancer                        | ko0523<br>1 | 1 out of 53 1.88679245283019%      | 3 out of 221 1.35746606334842%     | 0.56260403<br>6          | 1 |
| Citrate cycle (TCA cycle)                           | ko0002<br>0 | 1 out of 53 1.88679245283019%      | 3 out of 221 1.35746606334842%     | 0.56260403<br>6          | 1 |
| Polycyclic aromatic hydrocarbon degradation         | ko0062<br>4 | 1 out of 53 1.88679245283019%      | 3 out of 221 1.35746606334842%     | 0.56260403<br>6          | 1 |
| Plant hormone signal transduction                   | ko0407<br>5 | 1 out of 53 1.88679245283019%      | 3 out of 221 1.35746606334842%     | 0.56260403<br>6          | 1 |
| Pathways in cancer                                  | ko0520<br>0 | 1 out of 53 1.88679245283019%      | 3 out of 221 1.35746606334842%     | 0.56260403<br>6          | 1 |
| Aminobenzoate degradation                           | ko0062<br>7 | 1 out of 53 1.88679245283019%      | 12 out of 221<br>5.42986425339367% | 0.56260403<br>6          | 1 |
| Isoquinoline alkaloid biosynthesis                  | ko0095<br>0 | 3 out of 53 5.66037735849057%      | 4 out of 221 1.80995475113122%     | 0.58196195<br>0.66894342 | 1 |
|                                                     |             |                                    |                                    | 2                        | 1 |

|                                                                 |        |                               |                                |   |            |   |
|-----------------------------------------------------------------|--------|-------------------------------|--------------------------------|---|------------|---|
|                                                                 | ko0072 |                               |                                |   | 0.66894342 |   |
| Carbon fixation pathways in prokaryotes                         | 0      | 1 out of 53 1.88679245283019% | 4 out of 221 1.80995475113122% | 2 |            | 1 |
|                                                                 | ko0075 |                               |                                |   | 0.66894342 |   |
| Vitamin B6 metabolism                                           | 0      | 1 out of 53 1.88679245283019% | 4 out of 221 1.80995475113122% | 2 |            | 1 |
|                                                                 | ko0033 |                               |                                |   | 0.66894342 |   |
| Carbapenem biosynthesis                                         | 2      | 1 out of 53 1.88679245283019% | 4 out of 221 1.80995475113122% | 2 |            | 1 |
|                                                                 | ko0065 |                               |                                |   | 0.66894342 |   |
| Butanoate metabolism                                            | 0      | 1 out of 53 1.88679245283019% | 4 out of 221 1.80995475113122% | 2 |            | 1 |
|                                                                 | ko0106 |                               |                                |   | 0.66894342 |   |
| Biosynthesis of alkaloids derived from terpenoid and polyketide | 6      | 1 out of 53 1.88679245283019% | 4 out of 221 1.80995475113122% | 2 |            | 1 |
|                                                                 | ko0019 |                               |                                |   | 0.66894342 |   |
| Oxidative phosphorylation                                       | 0      | 1 out of 53 1.88679245283019% | 4 out of 221 1.80995475113122% | 2 |            | 1 |
|                                                                 | ko0497 |                               | 10 out of 221                  |   | 0.73870410 |   |
| Bile secretion                                                  | 6      | 2 out of 53 3.77358490566038% | 4.52488687782805%              | 5 |            | 1 |
|                                                                 | ko0056 |                               |                                |   | 0.74980055 |   |
| Glycerophospholipid metabolism                                  | 4      | 1 out of 53 1.88679245283019% | 5 out of 221 2.26244343891403% | 8 |            | 1 |
|                                                                 | ko0492 |                               |                                |   | 0.74980055 |   |
| Glucagon signaling pathway                                      | 2      | 1 out of 53 1.88679245283019% | 5 out of 221 2.26244343891403% | 8 |            | 1 |
|                                                                 | ko0415 |                               |                                |   | 0.74980055 |   |
| AMPK signaling pathway                                          | 2      | 1 out of 53 1.88679245283019% | 5 out of 221 2.26244343891403% | 8 |            | 1 |
|                                                                 | ko0106 |                               |                                |   | 0.74980055 |   |
| Biosynthesis of terpenoids and steroids                         | 2      | 1 out of 53 1.88679245283019% | 5 out of 221 2.26244343891403% | 8 |            | 1 |
|                                                                 | ko0120 |                               | 11 out of 221                  |   | 0.78823887 |   |
| Carbon metabolism                                               | 0      | 2 out of 53 3.77358490566038% | 4.97737556561086%              | 2 |            | 1 |
|                                                                 | ko0076 |                               | 11 out of 221                  |   | 0.78823887 |   |
| Nicotinate and nicotinamide metabolism                          | 0      | 2 out of 53 3.77358490566038% | 4.97737556561086%              | 2 |            | 1 |
|                                                                 | ko0497 |                               | 11 out of 221                  |   | 0.78823887 |   |
| Vitamin digestion and absorption                                | 7      | 2 out of 53 3.77358490566038% | 4.97737556561086%              | 2 |            | 1 |
|                                                                 | ko0027 |                               | 11 out of 221                  |   | 0.78823887 |   |
| Cysteine and methionine metabolism                              | 0      | 2 out of 53 3.77358490566038% | 4.97737556561086%              | 2 |            | 1 |
|                                                                 | ko0077 |                               |                                |   | 0.81119208 |   |
| Pantothenate and CoA biosynthesis                               | 0      | 1 out of 53 1.88679245283019% | 6 out of 221 2.71493212669683% | 8 |            | 1 |
|                                                                 | ko0152 |                               |                                |   | 0.81119208 |   |
| Antifolate resistance                                           | 3      | 1 out of 53 1.88679245283019% | 6 out of 221 2.71493212669683% | 8 |            | 1 |
|                                                                 | ko0030 |                               |                                |   | 0.81119208 |   |
| Lysine biosynthesis                                             | 0      | 1 out of 53 1.88679245283019% | 6 out of 221 2.71493212669683% | 8 |            | 1 |
|                                                                 | ko0048 |                               | 12 out of 221                  |   | 0.82949425 |   |
| Glutathione metabolism                                          | 0      | 2 out of 53 3.77358490566038% | 5.42986425339367%              | 6 |            | 1 |
|                                                                 | ko0096 |                               |                                |   | 0.85773543 |   |
| Glucosinolate biosynthesis                                      | 6      | 1 out of 53 1.88679245283019% | 7 out of 221 3.16742081447964% | 4 |            | 1 |
|                                                                 | ko0040 |                               |                                |   | 0.85773543 |   |
| Phenylalanine, tyrosine and tryptophan biosynthesis             | 0      | 1 out of 53 1.88679245283019% | 7 out of 221 3.16742081447964% | 4 |            | 1 |

|                                                                             |        |                               |                                |               |            |   |
|-----------------------------------------------------------------------------|--------|-------------------------------|--------------------------------|---------------|------------|---|
|                                                                             | ko0041 |                               |                                |               | 0.85773543 |   |
| beta-Alanine metabolism                                                     | 0      | 1 out of 53 1.88679245283019% | 7 out of 221 3.16742081447964% | 4             |            | 1 |
|                                                                             | ko0031 |                               |                                |               | 0.85773543 |   |
| Lysine degradation                                                          | 0      | 1 out of 53 1.88679245283019% | 7 out of 221 3.16742081447964% | 4             |            | 1 |
|                                                                             | ko0106 |                               |                                |               | 0.86351783 |   |
| Biosynthesis of alkaloids derived from histidine and purine                 | 5      | 2 out of 53 3.77358490566038% | 5.88235294117647%              | 5             |            | 1 |
|                                                                             | ko0112 |                               |                                |               | 0.86365721 |   |
| Microbial metabolism in diverse environments                                | 0      | 7 out of 53 13.2075471698113% | 17.1945701357466%              | 4             |            | 1 |
|                                                                             | ko0022 |                               |                                |               | 0.89296918 |   |
| Arginine biosynthesis                                                       | 0      | 1 out of 53 1.88679245283019% | 8 out of 221 3.61990950226244% | 1             |            | 1 |
|                                                                             | ko0202 |                               |                                |               | 0.93970094 |   |
| Two-component system                                                        | 0      | 1 out of 53 1.88679245283019% | 4.52488687782805%              | 7             |            | 1 |
|                                                                             | ko0025 |                               |                                |               | 0.93970094 |   |
| Alanine, aspartate and glutamate metabolism                                 | 0      | 1 out of 53 1.88679245283019% | 4.52488687782805%              | 7             |            | 1 |
|                                                                             | ko0113 |                               |                                |               |            |   |
| Biosynthesis of antibiotics                                                 | 0      | 5 out of 53 9.43396226415094% | 16.7420814479638%              |               | 0.97306332 | 1 |
| Biosynthesis of alkaloids derived from ornithine, lysine and nicotinic acid | ko0106 |                               |                                | 13 out of 221 | 0.97480329 |   |
|                                                                             | 4      | 1 out of 53 1.88679245283019% | 5.88235294117647%              | 3             |            | 1 |
|                                                                             | ko0106 |                               |                                | 13 out of 221 | 0.97480329 |   |
| Biosynthesis of alkaloids derived from shikimate pathway                    | 3      | 1 out of 53 1.88679245283019% | 5.88235294117647%              | 3             |            | 1 |
|                                                                             | ko0033 |                               |                                | 13 out of 221 | 0.97480329 |   |
| Arginine and proline metabolism                                             | 0      | 1 out of 53 1.88679245283019% | 5.88235294117647%              | 3             |            | 1 |
|                                                                             | ko0024 |                               |                                | 14 out of 221 | 0.98122360 |   |
| Pyrimidine metabolism                                                       | 0      | 1 out of 53 1.88679245283019% | 6.33484162895928%              | 8             |            | 1 |
|                                                                             | ko0497 |                               |                                | 14 out of 221 | 0.98122360 |   |
| Mineral absorption                                                          | 8      | 1 out of 53 1.88679245283019% | 6.33484162895928%              | 8             |            | 1 |
|                                                                             | ko0523 |                               |                                | 22 out of 221 | 0.98499784 |   |
| Central carbon metabolism in cancer                                         | 0      | 2 out of 53 3.77358490566038% | 9.95475113122172%              | 1             |            | 1 |
|                                                                             | ko0110 |                               |                                | 31 out of 53  | 0.98503892 |   |
| Metabolic pathways                                                          | 0      | 58.4905660377358%             | 69.683257918552%               | 2             |            | 1 |
|                                                                             | ko0106 |                               |                                | 40 out of 221 | 0.98587726 |   |
| Biosynthesis of plant secondary metabolites                                 | 0      | 5 out of 53 9.43396226415094% | 18.0995475113122%              | 3             |            | 1 |
|                                                                             | ko0121 |                               |                                | 15 out of 221 |            |   |
| 2-Oxocarboxylic acid metabolism                                             | 0      | 1 out of 53 1.88679245283019% | 6.78733031674208%              |               | 0.98603109 | 1 |
|                                                                             | ko0097 |                               |                                | 20 out of 221 | 0.99689648 |   |
| Aminoacyl-tRNA biosynthesis                                                 | 0      | 1 out of 53 1.88679245283019% | 9.04977375565611%              | 8             |            | 1 |
|                                                                             | ko0123 |                               |                                | 32 out of 221 | 0.99906761 |   |
| Biosynthesis of amino acids                                                 | 0      | 2 out of 53 3.77358490566038% | 14.4796380090498%              | 5             |            | 1 |
|                                                                             | ko0497 |                               |                                | 24 out of 221 | 0.99909757 |   |
| Protein digestion and absorption                                            | 4      | 1 out of 53 1.88679245283019% | 10.8597285067873%              | 9             |            | 1 |
|                                                                             | ko0201 |                               |                                | 30 out of 221 | 0.99986623 |   |
| ABC transporters                                                            | 0      | 1 out of 53 1.88679245283019% | 13.5746606334842%              | 6             |            | 1 |

---

PS2 vs PS3\_KEGG\_stat



|                                                     |        |                               |                                |            |   |
|-----------------------------------------------------|--------|-------------------------------|--------------------------------|------------|---|
|                                                     | ko0472 |                               |                                | 0.02131148 |   |
| Dopaminergic synapse                                | 8      | 3 out of 62 4.83870967741935% | 3 out of 221 1.35746606334842% | 5          | 1 |
|                                                     | ko0013 |                               |                                | 0.06794257 |   |
| Ubiquinone and other terpenoid-quinone biosynthesis | 0      | 3 out of 62 4.83870967741935% | 4 out of 221 1.80995475113122% | 7          | 1 |
|                                                     | ko0472 |                               |                                | 0.06794257 |   |
| Retrograde endocannabinoid signaling                | 3      | 3 out of 62 4.83870967741935% | 4 out of 221 1.80995475113122% | 7          | 1 |
|                                                     | ko0036 |                               |                                | 0.07250532 |   |
| Phenylalanine metabolism                            | 0      | 5 out of 62 8.06451612903226% | 9 out of 221 4.07239819004525% | 7          | 1 |
|                                                     | ko0513 |                               | 2 out of 221                   | 0.07778691 |   |
| Pertussis                                           | 3      | 2 out of 62 3.2258064516129%  | 0.904977375565611%             | 9          | 1 |
|                                                     | ko0491 |                               | 2 out of 221                   | 0.07778691 |   |
| Estrogen signaling pathway                          | 5      | 2 out of 62 3.2258064516129%  | 0.904977375565611%             | 9          | 1 |
|                                                     | ko0040 |                               | 2 out of 221                   | 0.07778691 |   |
| Novobiocin biosynthesis                             | 1      | 2 out of 62 3.2258064516129%  | 0.904977375565611%             | 9          | 1 |
|                                                     | ko0064 |                               | 2 out of 221                   | 0.07778691 |   |
| Propanoate metabolism                               | 0      | 2 out of 62 3.2258064516129%  | 0.904977375565611%             | 9          | 1 |
|                                                     | ko0491 |                               | 2 out of 221                   | 0.07778691 |   |
| Melanogenesis                                       | 6      | 2 out of 62 3.2258064516129%  | 0.904977375565611%             | 9          | 1 |
|                                                     | ko0035 |                               |                                | 0.09873435 |   |
| Tyrosine metabolism                                 | 0      | 4 out of 62 6.45161290322581% | 7 out of 221 3.16742081447964% | 2          | 1 |
|                                                     | ko0040 |                               |                                | 0.09873435 |   |
| Phenylalanine, tyrosine and tryptophan biosynthesis | 0      | 4 out of 62 6.45161290322581% | 7 out of 221 3.16742081447964% | 2          | 1 |
|                                                     | ko0094 |                               | 16 out of 221                  | 0.12422984 |   |
| Phenylpropanoid biosynthesis                        | 0      | 7 out of 62 11.2903225806452% | 7.23981900452489%              | 4          | 1 |
|                                                     | ko0023 |                               |                                | 0.12473851 |   |
| Purine metabolism                                   | 0      | 8 out of 62 12.9032258064516% | 19 out of 221 8.5972850678733% | 6          | 1 |
|                                                     | ko0472 |                               |                                | 0.13584776 |   |
| GABAergic synapse                                   | 7      | 3 out of 62 4.83870967741935% | 5 out of 221 2.26244343891403% | 3          | 1 |
|                                                     | ko0076 |                               | 11 out of 221                  | 0.16399892 |   |
| Nicotinate and nicotinamide metabolism              | 0      | 5 out of 62 8.06451612903226% | 4.97737556561086%              | 4          | 1 |
|                                                     | ko0503 |                               |                                | 0.19073778 |   |
| Cocaine addiction                                   | 0      | 2 out of 62 3.2258064516129%  | 3 out of 221 1.35746606334842% | 8          | 1 |
|                                                     | ko0407 |                               |                                | 0.19073778 |   |
| Plant hormone signal transduction                   | 5      | 2 out of 62 3.2258064516129%  | 3 out of 221 1.35746606334842% | 8          | 1 |
|                                                     | ko0503 |                               |                                | 0.19073778 |   |
| Amphetamine addiction                               | 1      | 2 out of 62 3.2258064516129%  | 3 out of 221 1.35746606334842% | 8          | 1 |
|                                                     | ko0023 |                               |                                | 0.19073778 |   |
| Caffeine metabolism                                 | 2      | 2 out of 62 3.2258064516129%  | 3 out of 221 1.35746606334842% | 8          | 1 |
|                                                     | ko0402 |                               |                                | 0.21810944 |   |
| cAMP signaling pathway                              | 4      | 3 out of 62 4.83870967741935% | 6 out of 221 2.71493212669683% | 6          | 1 |
|                                                     | ko0122 |                               |                                |            |   |
| Degradation of aromatic compounds                   | 0      | 4 out of 62 6.45161290322581% | 9 out of 221 4.07239819004525% | 0.22338982 | 1 |

|                                                 |        |                               |                    |            |   |
|-------------------------------------------------|--------|-------------------------------|--------------------|------------|---|
| Biosynthesis of phenylpropanoids                | ko0106 | 10 out of 62                  | 28 out of 221      | 0.22629652 |   |
|                                                 | 1      | 16.1290322580645%             | 12.6696832579186%  | 1          | 1 |
| Oxytocin signaling pathway                      | ko0492 |                               | 1 out of 221       | 0.28054298 |   |
|                                                 | 1      | 1 out of 62 1.61290322580645% | 0.452488687782805% | 6          | 1 |
| Adrenergic signaling in cardiomyocytes          | ko0426 |                               | 1 out of 221       | 0.28054298 |   |
|                                                 | 1      | 1 out of 62 1.61290322580645% | 0.452488687782805% | 6          | 1 |
| Thyroid hormone signaling pathway               | ko0491 |                               | 1 out of 221       | 0.28054298 |   |
|                                                 | 9      | 1 out of 62 1.61290322580645% | 0.452488687782805% | 6          | 1 |
| Longevity regulating pathway - multiple species | ko0421 |                               | 1 out of 221       | 0.28054298 |   |
|                                                 | 3      | 1 out of 62 1.61290322580645% | 0.452488687782805% | 6          | 1 |
| Biofilm formation - Pseudomonas aeruginosa      | ko0202 |                               | 1 out of 221       | 0.28054298 |   |
|                                                 | 5      | 1 out of 62 1.61290322580645% | 0.452488687782805% | 6          | 1 |
| Dilated cardiomyopathy (DCM)                    | ko0541 |                               | 1 out of 221       | 0.28054298 |   |
|                                                 | 4      | 1 out of 62 1.61290322580645% | 0.452488687782805% | 6          | 1 |
| Pancreatic secretion                            | ko0497 |                               | 1 out of 221       | 0.28054298 |   |
|                                                 | 2      | 1 out of 62 1.61290322580645% | 0.452488687782805% | 6          | 1 |
| Ras signaling pathway                           | ko0401 |                               | 1 out of 221       | 0.28054298 |   |
|                                                 | 4      | 1 out of 62 1.61290322580645% | 0.452488687782805% | 6          | 1 |
| Biosynthesis of enediyne antibiotics            | ko0105 |                               | 1 out of 221       | 0.28054298 |   |
|                                                 | 9      | 1 out of 62 1.61290322580645% | 0.452488687782805% | 6          | 1 |
| Calcium signaling pathway                       | ko0402 |                               | 1 out of 221       | 0.28054298 |   |
|                                                 | 0      | 1 out of 62 1.61290322580645% | 0.452488687782805% | 6          | 1 |
| Betalain biosynthesis                           | ko0096 |                               | 1 out of 221       | 0.28054298 |   |
|                                                 | 5      | 1 out of 62 1.61290322580645% | 0.452488687782805% | 6          | 1 |
| Human papillomavirus infection                  | ko0516 |                               | 1 out of 221       | 0.28054298 |   |
|                                                 | 5      | 1 out of 62 1.61290322580645% | 0.452488687782805% | 6          | 1 |
| Vibrio cholerae infection                       | ko0511 |                               | 1 out of 221       | 0.28054298 |   |
|                                                 | 0      | 1 out of 62 1.61290322580645% | 0.452488687782805% | 6          | 1 |
| Relaxin signaling pathway                       | ko0492 |                               | 1 out of 221       | 0.28054298 |   |
|                                                 | 6      | 1 out of 62 1.61290322580645% | 0.452488687782805% | 6          | 1 |
| Salivary secretion                              | ko0497 |                               | 1 out of 221       | 0.28054298 |   |
|                                                 | 0      | 1 out of 62 1.61290322580645% | 0.452488687782805% | 6          | 1 |
| Biofilm formation - Escherichia coli            | ko0202 |                               | 1 out of 221       | 0.28054298 |   |
|                                                 | 6      | 1 out of 62 1.61290322580645% | 0.452488687782805% | 6          | 1 |
| Endocrine resistance                            | ko0152 |                               | 1 out of 221       | 0.28054298 |   |
|                                                 | 2      | 1 out of 62 1.61290322580645% | 0.452488687782805% | 6          | 1 |
| Oocyte meiosis                                  | ko0411 |                               | 1 out of 221       | 0.28054298 |   |
|                                                 | 4      | 1 out of 62 1.61290322580645% | 0.452488687782805% | 6          | 1 |
| MAPK signaling pathway                          | ko0401 |                               | 1 out of 221       | 0.28054298 |   |
|                                                 | 0      | 1 out of 62 1.61290322580645% | 0.452488687782805% | 6          | 1 |
| Drug metabolism - other enzymes                 | ko0098 |                               | 1 out of 221       | 0.28054298 |   |
|                                                 | 3      | 1 out of 62 1.61290322580645% | 0.452488687782805% | 6          | 1 |

|                                                           |        |             |                   |                    |            |   |
|-----------------------------------------------------------|--------|-------------|-------------------|--------------------|------------|---|
| Aldosterone-regulated sodium reabsorption                 | ko0496 |             |                   | 1 out of 221       | 0.28054298 |   |
|                                                           | 0      | 1 out of 62 | 1.61290322580645% | 0.452488687782805% | 6          | 1 |
| GnRH signaling pathway                                    | ko0491 |             |                   | 1 out of 221       | 0.28054298 |   |
|                                                           | 2      | 1 out of 62 | 1.61290322580645% | 0.452488687782805% | 6          | 1 |
| Carotenoid biosynthesis                                   | ko0090 |             |                   | 1 out of 221       | 0.28054298 |   |
|                                                           | 6      | 1 out of 62 | 1.61290322580645% | 0.452488687782805% | 6          | 1 |
| Rap1 signaling pathway                                    | ko0401 |             |                   | 1 out of 221       | 0.28054298 |   |
|                                                           | 5      | 1 out of 62 | 1.61290322580645% | 0.452488687782805% | 6          | 1 |
| Anthocyanin biosynthesis                                  | ko0094 |             |                   | 1 out of 221       | 0.28054298 |   |
|                                                           | 2      | 1 out of 62 | 1.61290322580645% | 0.452488687782805% | 6          | 1 |
| Biosynthesis of vancomycin group antibiotics              | ko0105 |             |                   | 1 out of 221       | 0.28054298 |   |
|                                                           | 5      | 1 out of 62 | 1.61290322580645% | 0.452488687782805% | 6          | 1 |
| Leukocyte transendothelial migration                      | ko0467 |             |                   | 1 out of 221       | 0.28054298 |   |
|                                                           | 0      | 1 out of 62 | 1.61290322580645% | 0.452488687782805% | 6          | 1 |
| Prion diseases                                            | ko0502 |             |                   | 1 out of 221       | 0.28054298 |   |
|                                                           | 0      | 1 out of 62 | 1.61290322580645% | 0.452488687782805% | 6          | 1 |
| Progesterone-mediated oocyte maturation                   | ko0491 |             |                   | 1 out of 221       | 0.28054298 |   |
|                                                           | 4      | 1 out of 62 | 1.61290322580645% | 0.452488687782805% | 6          | 1 |
| Apelin signaling pathway                                  | ko0437 |             |                   | 1 out of 221       | 0.28054298 |   |
|                                                           | 1      | 1 out of 62 | 1.61290322580645% | 0.452488687782805% | 6          | 1 |
| Vasopressin-regulated water reabsorption                  | ko0496 |             |                   | 1 out of 221       | 0.28054298 |   |
|                                                           | 2      | 1 out of 62 | 1.61290322580645% | 0.452488687782805% | 6          | 1 |
| Benzoic acid family                                       | ko0711 |             |                   | 1 out of 221       | 0.28054298 |   |
|                                                           | 0      | 1 out of 62 | 1.61290322580645% | 0.452488687782805% | 6          | 1 |
| HTLV-I infection                                          | ko0516 |             |                   | 1 out of 221       | 0.28054298 |   |
|                                                           | 6      | 1 out of 62 | 1.61290322580645% | 0.452488687782805% | 6          | 1 |
| Chemokine signaling pathway                               | ko0406 |             |                   | 1 out of 221       | 0.28054298 |   |
|                                                           | 2      | 1 out of 62 | 1.61290322580645% | 0.452488687782805% | 6          | 1 |
| Hedgehog signaling pathway                                | ko0434 |             |                   | 1 out of 221       | 0.28054298 |   |
|                                                           | 0      | 1 out of 62 | 1.61290322580645% | 0.452488687782805% | 6          | 1 |
| Caprolactam degradation                                   | ko0093 |             |                   | 1 out of 221       | 0.28054298 |   |
|                                                           | 0      | 1 out of 62 | 1.61290322580645% | 0.452488687782805% | 6          | 1 |
| Chlorocyclohexane and chlorobenzene degradation           | ko0036 |             |                   | 1 out of 221       | 0.28054298 |   |
|                                                           | 1      | 1 out of 62 | 1.61290322580645% | 0.452488687782805% | 6          | 1 |
| Platelet activation                                       | ko0461 |             |                   | 1 out of 221       | 0.28054298 |   |
|                                                           | 1      | 1 out of 62 | 1.61290322580645% | 0.452488687782805% | 6          | 1 |
| Circadian rhythm                                          | ko0471 |             |                   | 1 out of 221       | 0.28054298 |   |
|                                                           | 0      | 1 out of 62 | 1.61290322580645% | 0.452488687782805% | 6          | 1 |
| Fatty acid degradation                                    | ko0007 |             |                   | 1 out of 221       | 0.28054298 |   |
|                                                           | 1      | 1 out of 62 | 1.61290322580645% | 0.452488687782805% | 6          | 1 |
| Endocrine and other factor-regulated calcium reabsorption | ko0496 |             |                   | 1 out of 221       | 0.28054298 |   |
|                                                           | 1      | 1 out of 62 | 1.61290322580645% | 0.452488687782805% | 6          | 1 |

|                                                        |        |   |                               |                                |            |   |   |
|--------------------------------------------------------|--------|---|-------------------------------|--------------------------------|------------|---|---|
| Puromycin biosynthesis                                 | ko0023 | 1 | 1 out of 62 1.61290322580645% | 1 out of 221                   | 0.28054298 | 6 | 1 |
|                                                        | ko0038 | 0 | 4 out of 62 6.45161290322581% | 10 out of 221                  | 0.29645966 | 9 | 1 |
| Tryptophan metabolism                                  | ko0096 | 0 | 4 out of 62 6.45161290322581% | 4.52488687782805%              | 0.30764076 | 6 | 1 |
| Tropane, piperidine and pyridine alkaloid biosynthesis | ko0095 | 0 | 3 out of 62 4.83870967741935% | 7 out of 221 3.16742081447964% | 0.31353299 | 8 | 1 |
| Isoquinoline alkaloid biosynthesis                     | ko0503 | 4 | 2 out of 62 3.2258064516129%  | 4 out of 221 1.80995475113122% | 0.31353299 | 8 | 1 |
| Alcoholism                                             | ko0503 | 4 | 2 out of 62 3.2258064516129%  | 4 out of 221 1.80995475113122% | 0.31353299 | 8 | 1 |
| Morphine addiction                                     | ko0065 | 0 | 2 out of 62 3.2258064516129%  | 4 out of 221 1.80995475113122% | 0.31353299 | 8 | 1 |
| Butanoate metabolism                                   | ko0107 | 0 | 2 out of 62 3.2258064516129%  | 4 out of 221 1.80995475113122% | 0.41668752 | 5 | 1 |
| Biosynthesis of plant hormones                         | ko0492 | 2 | 5 out of 62 8.06451612903226% | 6.78733031674208%              | 0.43198982 | 2 | 1 |
| Glucagon signaling pathway                             | ko0106 | 2 | 2 out of 62 3.2258064516129%  | 5 out of 221 2.26244343891403% | 0.43198982 | 2 | 1 |
| Biosynthesis of terpenoids and steroids                | ko0491 | 8 | 2 out of 62 3.2258064516129%  | 5 out of 221 2.26244343891403% | 0.43198982 | 2 | 1 |
| Thyroid hormone synthesis                              | ko0501 | 2 | 2 out of 62 3.2258064516129%  | 5 out of 221 2.26244343891403% | 0.43198982 | 2 | 1 |
| Parkinson's disease                                    | ko0421 | 2 | 2 out of 62 3.2258064516129%  | 5 out of 221 2.26244343891403% | 0.48329905 | 4 | 1 |
| Longevity regulating pathway - worm                    | ko0202 | 4 | 1 out of 62 1.61290322580645% | 0.904977375565611%             | 0.48329905 | 4 | 1 |
| Quorum sensing                                         | ko0472 | 0 | 1 out of 62 1.61290322580645% | 0.904977375565611%             | 0.48329905 | 4 | 1 |
| Long-term potentiation                                 | ko0059 | 2 | 1 out of 62 1.61290322580645% | 0.904977375565611%             | 0.48329905 | 4 | 1 |
| alpha-Linolenic acid metabolism                        | ko0472 | 5 | 1 out of 62 1.61290322580645% | 0.904977375565611%             | 0.48329905 | 4 | 1 |
| Cholinergic synapse                                    | ko0059 | 1 | 1 out of 62 1.61290322580645% | 0.904977375565611%             | 0.48329905 | 4 | 1 |
| Linoleic acid metabolism                               | ko0079 | 0 | 1 out of 62 1.61290322580645% | 0.904977375565611%             | 0.48329905 | 4 | 1 |
| Folate biosynthesis                                    | ko0514 | 6 | 1 out of 62 1.61290322580645% | 0.904977375565611%             | 0.48329905 | 4 | 1 |
| Amoebiasis                                             | ko0040 | 2 | 1 out of 62 1.61290322580645% | 0.904977375565611%             | 0.48329905 | 4 | 1 |
| Benzoxazinoid biosynthesis                             |        | 2 | 1 out of 62 1.61290322580645% | 0.904977375565611%             | 4          |   | 1 |

|                                                          |        |   |                               |                                |            |   |   |
|----------------------------------------------------------|--------|---|-------------------------------|--------------------------------|------------|---|---|
| Ovarian steroidogenesis                                  | ko0491 | 3 | 1 out of 62 1.61290322580645% | 2 out of 221                   | 0.48329905 | 4 | 1 |
| Bisphenol degradation                                    | ko0036 | 3 | 1 out of 62 1.61290322580645% | 2 out of 221                   | 0.48329905 | 4 | 1 |
| Staurosporine biosynthesis                               | ko0040 | 4 | 1 out of 62 1.61290322580645% | 2 out of 221                   | 0.48329905 | 4 | 1 |
| Nicotine addiction                                       | ko0503 | 3 | 1 out of 62 1.61290322580645% | 2 out of 221                   | 0.48329905 | 4 | 1 |
| Chagas disease (American trypanosomiasis)                | ko0514 | 2 | 1 out of 62 1.61290322580645% | 2 out of 221                   | 0.48329905 | 4 | 1 |
| Cell cycle - yeast                                       | ko0411 | 1 | 1 out of 62 1.61290322580645% | 2 out of 221                   | 0.48329905 | 4 | 1 |
| Phospholipase D signaling pathway                        | ko0407 | 2 | 1 out of 62 1.61290322580645% | 2 out of 221                   | 0.48329905 | 4 | 1 |
| Gastric acid secretion                                   | ko0497 | 1 | 1 out of 62 1.61290322580645% | 2 out of 221                   | 0.48329905 | 4 | 1 |
| Circadian entrainment                                    | ko0471 | 3 | 1 out of 62 1.61290322580645% | 2 out of 221                   | 0.48329905 | 4 | 1 |
| Vascular smooth muscle contraction                       | ko0427 | 0 | 1 out of 62 1.61290322580645% | 2 out of 221                   | 0.48329905 | 4 | 1 |
| Prodigiosin biosynthesis                                 | ko0033 | 3 | 1 out of 62 1.61290322580645% | 2 out of 221                   | 0.48329905 | 4 | 1 |
| Insulin signaling pathway                                | ko0491 | 0 | 1 out of 62 1.61290322580645% | 2 out of 221                   | 0.48329905 | 4 | 1 |
| Meiosis - yeast                                          | ko0411 | 3 | 1 out of 62 1.61290322580645% | 2 out of 221                   | 0.48329905 | 4 | 1 |
| Arginine and proline metabolism                          | ko0033 | 0 | 4 out of 62 6.45161290322581% | 13 out of 221                  | 0.52005100 | 3 | 1 |
| Biosynthesis of alkaloids derived from shikimate pathway | ko0106 | 3 | 4 out of 62 6.45161290322581% | 13 out of 221                  | 0.52005100 | 3 | 1 |
| Pyrimidine metabolism                                    | ko0024 | 0 | 4 out of 62 6.45161290322581% | 14 out of 221                  | 0.58808356 | 2 | 1 |
| Flavone and flavonol biosynthesis                        | ko0094 | 4 | 4 out of 62 6.45161290322581% | 14 out of 221                  | 0.58808356 | 2 | 1 |
| Benzoate degradation                                     | ko0036 | 2 | 1 out of 62 1.61290322580645% | 3 out of 221 1.35746606334842% | 0.62957968 | 7 | 1 |
| Serotonergic synapse                                     | ko0472 | 6 | 1 out of 62 1.61290322580645% | 3 out of 221 1.35746606334842% | 0.62957968 | 7 | 1 |
| Biofilm formation - Vibrio cholerae                      | ko0511 | 1 | 1 out of 62 1.61290322580645% | 3 out of 221 1.35746606334842% | 0.62957968 | 7 | 1 |
| Pathways in cancer                                       | ko0520 | 0 | 1 out of 62 1.61290322580645% | 3 out of 221 1.35746606334842% | 0.62957968 | 7 | 1 |

|                                                                 |        |   |                               |                                |            |   |   |
|-----------------------------------------------------------------|--------|---|-------------------------------|--------------------------------|------------|---|---|
| Gap junction                                                    | ko0454 | 0 | 1 out of 62 1.61290322580645% | 3 out of 221 1.35746606334842% | 0.62957968 | 7 | 1 |
| Insulin secretion                                               | ko0491 | 1 | 1 out of 62 1.61290322580645% | 3 out of 221 1.35746606334842% | 0.62957968 | 7 | 1 |
| Renin secretion                                                 | ko0492 | 4 | 1 out of 62 1.61290322580645% | 3 out of 221 1.35746606334842% | 0.62957968 | 7 | 1 |
| Glutamatergic synapse                                           | ko0472 | 4 | 1 out of 62 1.61290322580645% | 3 out of 221 1.35746606334842% | 0.62957968 | 7 | 1 |
| Longevity regulating pathway                                    | ko0421 | 1 | 1 out of 62 1.61290322580645% | 3 out of 221 1.35746606334842% | 0.62957968 | 7 | 1 |
| Citrate cycle (TCA cycle)                                       | ko0002 | 0 | 1 out of 62 1.61290322580645% | 3 out of 221 1.35746606334842% | 0.62957968 | 7 | 1 |
| Prolactin signaling pathway                                     | ko0491 | 7 | 1 out of 62 1.61290322580645% | 3 out of 221 1.35746606334842% | 0.62957968 | 7 | 1 |
| Choline metabolism in cancer                                    | ko0523 | 1 | 1 out of 62 1.61290322580645% | 3 out of 221 1.35746606334842% | 0.62957968 | 7 | 1 |
| Methane metabolism                                              | ko0068 | 0 | 1 out of 62 1.61290322580645% | 3 out of 221 1.35746606334842% | 0.62957968 | 7 | 1 |
| Regulation of lipolysis in adipocytes                           | ko0492 | 3 | 1 out of 62 1.61290322580645% | 3 out of 221 1.35746606334842% | 0.62957968 | 7 | 1 |
| Pyruvate metabolism                                             | ko0062 | 0 | 1 out of 62 1.61290322580645% | 3 out of 221 1.35746606334842% | 0.62957968 | 7 | 1 |
| Pentose phosphate pathway                                       | ko0003 | 0 | 1 out of 62 1.61290322580645% | 3 out of 221 1.35746606334842% | 0.62957968 | 7 | 1 |
| Lysine degradation                                              | ko0031 | 0 | 2 out of 62 3.2258064516129%  | 7 out of 221 3.16742081447964% | 0.63144570 | 7 | 1 |
| Glucosinolate biosynthesis                                      | ko0096 | 6 | 2 out of 62 3.2258064516129%  | 7 out of 221 3.16742081447964% | 0.63144570 | 7 | 1 |
| beta-Alanine metabolism                                         | ko0041 | 0 | 2 out of 62 3.2258064516129%  | 7 out of 221 3.16742081447964% | 0.63144570 | 7 | 1 |
| Cyanoamino acid metabolism                                      | ko0046 | 0 | 2 out of 62 3.2258064516129%  | 8 out of 221 3.61990950226244% | 0.70911854 | 3 | 1 |
| Inflammatory mediator regulation of TRP channels                | ko0475 | 0 | 2 out of 62 3.2258064516129%  | 8 out of 221 3.61990950226244% | 0.73492858 | 3 | 1 |
| Carbon fixation pathways in prokaryotes                         | ko0072 | 0 | 1 out of 62 1.61290322580645% | 4 out of 221 1.80995475113122% | 0.73492858 | 3 | 1 |
| Synaptic vesicle cycle                                          | ko0472 | 0 | 1 out of 62 1.61290322580645% | 4 out of 221 1.80995475113122% | 0.73492858 | 3 | 1 |
| Biosynthesis of alkaloids derived from terpenoid and polyketide | ko0106 | 1 | 1 out of 62 1.61290322580645% | 4 out of 221 1.80995475113122% | 0.73492858 | 3 | 1 |
| Olfactory transduction                                          | ko0474 | 6 | 1 out of 62 1.61290322580645% | 4 out of 221 1.80995475113122% | 0.73492858 | 3 | 1 |
|                                                                 | ko0474 | 0 | 1 out of 62 1.61290322580645% | 4 out of 221 1.80995475113122% | 0.73492858 | 3 | 1 |

|                                                                             |        |                               |                                |            |            |   |
|-----------------------------------------------------------------------------|--------|-------------------------------|--------------------------------|------------|------------|---|
|                                                                             | ko0062 |                               |                                |            | 0.73492858 |   |
| Toluene degradation                                                         | 3      | 1 out of 62 1.61290322580645% | 4 out of 221 1.80995475113122% | 3          |            | 1 |
|                                                                             | ko0050 |                               |                                | 0.73492858 |            |   |
| Starch and sucrose metabolism                                               | 0      | 1 out of 62 1.61290322580645% | 4 out of 221 1.80995475113122% | 3          |            | 1 |
|                                                                             | ko0033 |                               |                                | 0.73492858 |            |   |
| Carbapenem biosynthesis                                                     | 2      | 1 out of 62 1.61290322580645% | 4 out of 221 1.80995475113122% | 3          |            | 1 |
|                                                                             | ko0019 |                               |                                | 0.73492858 |            |   |
| Oxidative phosphorylation                                                   | 0      | 1 out of 62 1.61290322580645% | 4 out of 221 1.80995475113122% | 3          |            | 1 |
|                                                                             | ko0028 |                               |                                | 0.73492858 |            |   |
| Valine, leucine and isoleucine degradation                                  | 0      | 1 out of 62 1.61290322580645% | 4 out of 221 1.80995475113122% | 3          |            | 1 |
|                                                                             | ko0111 | 22 out of 62                  | 84 out of 221                  | 0.73680994 |            |   |
| Biosynthesis of secondary metabolites                                       | 0      | 35.4838709677419%             | 38.0090497737557%              | 9          |            | 1 |
| Biosynthesis of alkaloids derived from ornithine, lysine and nicotinic acid | ko0106 |                               | 13 out of 221                  | 0.75989460 |            |   |
|                                                                             | 4      | 3 out of 62 4.83870967741935% | 5.88235294117647%              | 2          |            | 1 |
|                                                                             | ko0106 |                               | 13 out of 221                  | 0.75989460 |            |   |
| Biosynthesis of alkaloids derived from histidine and purine                 | 5      | 3 out of 62 4.83870967741935% | 5.88235294117647%              | 2          |            | 1 |
|                                                                             | ko0112 |                               | 38 out of 221                  | 0.80280981 |            |   |
| Microbial metabolism in diverse environments                                | 0      | 9 out of 62 14.5161290322581% | 17.1945701357466%              | 8          |            | 1 |
|                                                                             | ko0421 |                               |                                | 0.81066327 |            |   |
| Ferroptosis                                                                 | 6      | 1 out of 62 1.61290322580645% | 5 out of 221 2.26244343891403% | 4          |            | 1 |
|                                                                             | ko0056 |                               |                                | 0.81066327 |            |   |
| Glycerophospholipid metabolism                                              | 4      | 1 out of 62 1.61290322580645% | 5 out of 221 2.26244343891403% | 4          |            | 1 |
|                                                                             | ko0402 |                               |                                | 0.81066327 |            |   |
| cGMP-PKG signaling pathway                                                  | 2      | 1 out of 62 1.61290322580645% | 5 out of 221 2.26244343891403% | 4          |            | 1 |
|                                                                             | ko0073 |                               |                                | 0.81066327 |            |   |
| Thiamine metabolism                                                         | 0      | 1 out of 62 1.61290322580645% | 5 out of 221 2.26244343891403% | 4          |            | 1 |
|                                                                             | ko0492 |                               |                                | 0.81066327 |            |   |
| Aldosterone synthesis and secretion                                         | 5      | 1 out of 62 1.61290322580645% | 5 out of 221 2.26244343891403% | 4          |            | 1 |
|                                                                             | ko0092 |                               |                                | 0.81066327 |            |   |
| Sulfur metabolism                                                           | 0      | 1 out of 62 1.61290322580645% | 5 out of 221 2.26244343891403% | 4          |            | 1 |
|                                                                             | ko0415 |                               |                                | 0.81066327 |            |   |
| AMPK signaling pathway                                                      | 2      | 1 out of 62 1.61290322580645% | 5 out of 221 2.26244343891403% | 4          |            | 1 |
|                                                                             | ko0063 |                               |                                | 0.81066327 |            |   |
| Glyoxylate and dicarboxylate metabolism                                     | 0      | 1 out of 62 1.61290322580645% | 5 out of 221 2.26244343891403% | 4          |            | 1 |
|                                                                             | ko0094 |                               |                                | 0.81066327 |            |   |
| Isoflavonoid biosynthesis                                                   | 3      | 1 out of 62 1.61290322580645% | 5 out of 221 2.26244343891403% | 4          |            | 1 |
|                                                                             | ko0497 |                               | 10 out of 221                  | 0.82431413 |            |   |
| Bile secretion                                                              | 6      | 2 out of 62 3.2258064516129%  | 4.52488687782805%              | 3          |            | 1 |
|                                                                             | ko0025 |                               | 10 out of 221                  | 0.82431413 |            |   |
| Alanine, aspartate and glutamate metabolism                                 | 0      | 2 out of 62 3.2258064516129%  | 4.52488687782805%              | 3          |            | 1 |
|                                                                             | ko0474 |                               | 10 out of 221                  | 0.82431413 |            |   |
| Taste transduction                                                          | 2      | 2 out of 62 3.2258064516129%  | 4.52488687782805%              | 3          |            | 1 |

|                                             |        |                               |                                |            |   |
|---------------------------------------------|--------|-------------------------------|--------------------------------|------------|---|
| 2-Oxocarboxylic acid metabolism             | ko0121 |                               | 15 out of 221                  | 0.84583784 |   |
|                                             | 0      | 3 out of 62 4.83870967741935% | 6.78733031674208%              | 9          | 1 |
| Biosynthesis of amino acids                 | ko0123 |                               | 32 out of 221                  | 0.85482286 |   |
|                                             | 0      | 7 out of 62 11.2903225806452% | 14.4796380090498%              | 3          | 1 |
| Protein digestion and absorption            | ko0497 |                               | 24 out of 221                  | 0.86000702 |   |
|                                             | 4      | 5 out of 62 8.06451612903226% | 10.8597285067873%              | 2          | 1 |
| Monobactam biosynthesis                     | ko0026 |                               |                                | 0.86500992 |   |
|                                             | 1      | 1 out of 62 1.61290322580645% | 6 out of 221 2.71493212669683% | 7          | 1 |
| Pantothenate and CoA biosynthesis           | ko0077 |                               |                                | 0.86500992 |   |
|                                             | 0      | 1 out of 62 1.61290322580645% | 6 out of 221 2.71493212669683% | 7          | 1 |
| Lysine biosynthesis                         | ko0030 |                               |                                | 0.86500992 |   |
|                                             | 0      | 1 out of 62 1.61290322580645% | 6 out of 221 2.71493212669683% | 7          | 1 |
| Zeatin biosynthesis                         | ko0090 |                               |                                | 0.86500992 |   |
|                                             | 8      | 1 out of 62 1.61290322580645% | 6 out of 221 2.71493212669683% | 7          | 1 |
| Cysteine and methionine metabolism          | ko0027 |                               | 11 out of 221                  | 0.86521054 |   |
|                                             | 0      | 2 out of 62 3.2258064516129%  | 4.97737556561086%              | 1          | 1 |
| Carbon metabolism                           | ko0120 |                               | 11 out of 221                  | 0.86521054 |   |
|                                             | 0      | 2 out of 62 3.2258064516129%  | 4.97737556561086%              | 1          | 1 |
| Biosynthesis of antibiotics                 | ko0113 |                               | 37 out of 221                  | 0.87761867 |   |
|                                             | 0      | 8 out of 62 12.9032258064516% | 16.7420814479638%              | 1          | 1 |
| Metabolic pathways                          | ko0110 |                               | 154 out of 221                 | 0.88551301 |   |
|                                             | 0      | 64.5161290322581%             | 69.683257918552%               | 6          | 1 |
| Flavonoid biosynthesis                      | ko0094 |                               | 21 out of 221                  | 0.89272807 |   |
|                                             | 1      | 4 out of 62 6.45161290322581% | 9.50226244343891%              | 6          | 1 |
| Aminobenzoate degradation                   | ko0062 |                               | 12 out of 221                  | 0.89734343 |   |
|                                             | 7      | 2 out of 62 3.2258064516129%  | 5.42986425339367%              | 4          | 1 |
| Phosphotransferase system (PTS)             | ko0206 |                               |                                | 0.90393729 |   |
|                                             | 0      | 1 out of 62 1.61290322580645% | 7 out of 221 3.16742081447964% | 7          | 1 |
| Central carbon metabolism in cancer         | ko0523 |                               | 22 out of 221                  | 0.91432442 |   |
|                                             | 0      | 4 out of 62 6.45161290322581% | 9.95475113122172%              | 9          | 1 |
| Biosynthesis of plant secondary metabolites | ko0106 |                               | 40 out of 221                  | 0.92958078 |   |
|                                             | 0      | 8 out of 62 12.9032258064516% | 18.0995475113122%              | 7          | 1 |
| Arginine biosynthesis                       | ko0022 |                               |                                | 0.93176854 |   |
|                                             | 0      | 1 out of 62 1.61290322580645% | 8 out of 221 3.61990950226244% | 7          | 1 |
| Mineral absorption                          | ko0497 |                               | 14 out of 221                  | 0.94159779 |   |
|                                             | 8      | 2 out of 62 3.2258064516129%  | 6.33484162895928%              | 2          | 1 |
| Glycine, serine and threonine metabolism    | ko0026 |                               |                                | 0.95162934 |   |
|                                             | 0      | 1 out of 62 1.61290322580645% | 9 out of 221 4.07239819004525% | 6          | 1 |
| Neuroactive ligand-receptor interaction     | ko0408 |                               |                                | 0.95162934 |   |
|                                             | 0      | 1 out of 62 1.61290322580645% | 9 out of 221 4.07239819004525% | 6          | 1 |
| Aminoacyl-tRNA biosynthesis                 | ko0097 |                               | 20 out of 221                  | 0.95547776 |   |
|                                             | 0      | 3 out of 62 4.83870967741935% | 9.04977375565611%              | 9          | 1 |



|                                  |        |                               |                   |            |  |   |
|----------------------------------|--------|-------------------------------|-------------------|------------|--|---|
| Two-component system             | ko0202 |                               | 10 out of 221     |            |  |   |
|                                  | 0      | 1 out of 62 1.61290322580645% | 4.52488687782805% | 0.96577548 |  | 1 |
| Vitamin digestion and absorption | ko0497 |                               | 11 out of 221     | 0.97583197 |  |   |
|                                  | 7      | 1 out of 62 1.61290322580645% | 4.97737556561086% | 4          |  | 1 |
| Glutathione metabolism           | ko0048 |                               | 12 out of 221     | 0.98296729 |  |   |
|                                  | 0      | 1 out of 62 1.61290322580645% | 5.42986425339367% | 6          |  | 1 |
| ABC transporters                 | ko0201 |                               | 30 out of 221     | 0.99966783 |  |   |
|                                  | 0      | 2 out of 62 3.2258064516129%  | 13.5746606334842% | 2          |  | 1 |

---

**PS3 vs PS4\_KEGG\_stat**

|                                                             |        |                 |                                |            |  |   |
|-------------------------------------------------------------|--------|-----------------|--------------------------------|------------|--|---|
| Caffeine metabolism                                         | ko0023 |                 |                                | 0.01104455 |  |   |
|                                                             | 2      | 3 out of 50 6%  | 3 out of 221 1.35746606334842% | 6          |  | 1 |
| Biosynthesis of alkaloids derived from histidine and purine | ko0106 |                 | 13 out of 221                  | 0.04696710 |  |   |
|                                                             | 5      | 6 out of 50 12% | 5.88235294117647%              | 7          |  | 1 |
| Linoleic acid metabolism                                    | ko0059 |                 | 2 out of 221                   | 0.05039078 |  |   |
|                                                             | 1      | 2 out of 50 4%  | 0.904977375565611%             | 6          |  | 1 |
| D-Glutamine and D-glutamate metabolism                      | ko0047 |                 | 2 out of 221                   | 0.05039078 |  |   |
|                                                             | 1      | 2 out of 50 4%  | 0.904977375565611%             | 6          |  | 1 |
| Proximal tubule bicarbonate reclamation                     | ko0496 |                 | 2 out of 221                   | 0.05039078 |  |   |
|                                                             | 4      | 2 out of 50 4%  | 0.904977375565611%             | 6          |  | 1 |
| Nitrogen metabolism                                         | ko0091 |                 | 2 out of 221                   | 0.05039078 |  |   |
|                                                             | 0      | 2 out of 50 4%  | 0.904977375565611%             | 6          |  | 1 |
| Isoflavonoid biosynthesis                                   | ko0094 |                 |                                | 0.07775665 |  |   |
|                                                             | 3      | 3 out of 50 6%  | 5 out of 221 2.26244343891403% | 2          |  | 1 |
| Neuroactive ligand-receptor interaction                     | ko0408 |                 |                                | 0.11977911 |  |   |
|                                                             | 0      | 4 out of 50 8%  | 9 out of 221 4.07239819004525% | 9          |  | 1 |
| Glutamatergic synapse                                       | ko0472 |                 |                                | 0.12908324 |  |   |
|                                                             | 4      | 2 out of 50 4%  | 3 out of 221 1.35746606334842% | 6          |  | 1 |
| Choline metabolism in cancer                                | ko0523 |                 |                                | 0.12908324 |  |   |
|                                                             | 1      | 2 out of 50 4%  | 3 out of 221 1.35746606334842% | 6          |  | 1 |
| Benzoate degradation                                        | ko0036 |                 |                                | 0.12908324 |  |   |
|                                                             | 2      | 2 out of 50 4%  | 3 out of 221 1.35746606334842% | 6          |  | 1 |
| Histidine metabolism                                        | ko0034 |                 |                                | 0.13085854 |  |   |
|                                                             | 0      | 3 out of 50 6%  | 6 out of 221 2.71493212669683% | 6          |  | 1 |
| Protein digestion and absorption                            | ko0497 |                 | 24 out of 221                  | 0.14289466 |  |   |
|                                                             | 4      | 8 out of 50 16% | 10.8597285067873%              | 4          |  | 1 |
| Tropane, piperidine and pyridine alkaloid biosynthesis      | ko0096 |                 |                                | 0.19309890 |  |   |
|                                                             | 0      | 3 out of 50 6%  | 7 out of 221 3.16742081447964% | 5          |  | 1 |
| Lysine degradation                                          | ko0031 |                 |                                | 0.19309890 |  |   |
|                                                             | 0      | 3 out of 50 6%  | 7 out of 221 3.16742081447964% | 5          |  | 1 |
| Retrograde endocannabinoid signaling                        | ko0472 |                 |                                | 0.22113176 |  |   |
|                                                             | 3      | 2 out of 50 4%  | 4 out of 221 1.80995475113122% | 5          |  | 1 |
| Carbapenem biosynthesis                                     | ko0033 |                 |                                | 0.22113176 |  |   |
|                                                             | 2      | 2 out of 50 4%  | 4 out of 221 1.80995475113122% | 5          |  | 1 |

|                                                                             |        |                  |                                |            |   |
|-----------------------------------------------------------------------------|--------|------------------|--------------------------------|------------|---|
|                                                                             | ko0062 |                  |                                | 0.22113176 |   |
| Toluene degradation                                                         | 3      | 2 out of 50 4%   | 4 out of 221 1.80995475113122% | 5          | 1 |
|                                                                             | ko0056 |                  | 1 out of 221                   | 0.22624434 |   |
| Ether lipid metabolism                                                      | 5      | 1 out of 50 2%   | 0.452488687782805%             | 4          | 1 |
|                                                                             | ko0473 |                  | 1 out of 221                   | 0.22624434 |   |
| Long-term depression                                                        | 0      | 1 out of 50 2%   | 0.452488687782805%             | 4          | 1 |
|                                                                             | ko0501 |                  | 1 out of 221                   | 0.22624434 |   |
| Huntington's disease                                                        | 6      | 1 out of 50 2%   | 0.452488687782805%             | 4          | 1 |
|                                                                             | ko0062 |                  | 1 out of 221                   | 0.22624434 |   |
| Dioxin degradation                                                          | 1      | 1 out of 50 2%   | 0.452488687782805%             | 4          | 1 |
|                                                                             | ko0203 |                  | 1 out of 221                   | 0.22624434 |   |
| Bacterial chemotaxis                                                        | 0      | 1 out of 50 2%   | 0.452488687782805%             | 4          | 1 |
|                                                                             | ko0094 |                  | 1 out of 221                   | 0.22624434 |   |
| Anthocyanin biosynthesis                                                    | 2      | 1 out of 50 2%   | 0.452488687782805%             | 4          | 1 |
|                                                                             | ko0066 |                  | 1 out of 221                   | 0.22624434 |   |
| C5-Branched dibasic acid metabolism                                         | 0      | 1 out of 50 2%   | 0.452488687782805%             | 4          | 1 |
|                                                                             | ko0093 |                  | 1 out of 221                   | 0.22624434 |   |
| Caprolactam degradation                                                     | 0      | 1 out of 50 2%   | 0.452488687782805%             | 4          | 1 |
|                                                                             | ko0007 |                  | 1 out of 221                   | 0.22624434 |   |
| Fatty acid degradation                                                      | 1      | 1 out of 50 2%   | 0.452488687782805%             | 4          | 1 |
|                                                                             | ko0711 |                  | 1 out of 221                   | 0.22624434 |   |
| Benzoic acid family                                                         | 0      | 1 out of 50 2%   | 0.452488687782805%             | 4          | 1 |
|                                                                             | ko0022 |                  |                                | 0.26109795 |   |
| Arginine biosynthesis                                                       | 0      | 3 out of 50 6%   | 8 out of 221 3.61990950226244% | 2          | 1 |
|                                                                             | ko0110 |                  | 154 out of 221                 | 0.28399863 |   |
| Metabolic pathways                                                          | 0      | 37 out of 50 74% | 69.683257918552%               | 6          | 1 |
|                                                                             | ko0056 |                  |                                | 0.31671517 |   |
| Glycerophospholipid metabolism                                              | 4      | 2 out of 50 4%   | 5 out of 221 2.26244343891403% | 4          | 1 |
|                                                                             | ko0029 |                  |                                | 0.31671517 |   |
| Valine, leucine and isoleucine biosynthesis                                 | 0      | 2 out of 50 4%   | 5 out of 221 2.26244343891403% | 4          | 1 |
|                                                                             | ko0472 |                  |                                | 0.31671517 |   |
| GABAergic synapse                                                           | 7      | 2 out of 50 4%   | 5 out of 221 2.26244343891403% | 4          | 1 |
|                                                                             | ko0043 |                  |                                | 0.31671517 |   |
| Taurine and hypotaurine metabolism                                          | 0      | 2 out of 50 4%   | 5 out of 221 2.26244343891403% | 4          | 1 |
|                                                                             | ko0063 |                  |                                | 0.31671517 |   |
| Glyoxylate and dicarboxylate metabolism                                     | 0      | 2 out of 50 4%   | 5 out of 221 2.26244343891403% | 4          | 1 |
|                                                                             | ko0421 |                  |                                | 0.31671517 |   |
| Ferroptosis                                                                 | 6      | 2 out of 50 4%   | 5 out of 221 2.26244343891403% | 4          | 1 |
| Biosynthesis of alkaloids derived from ornithine, lysine and nicotinic acid | ko0106 |                  | 13 out of 221                  | 0.33427111 |   |
|                                                                             | 4      | 4 out of 50 8%   | 5.88235294117647%              | 8          | 1 |
|                                                                             | ko0033 |                  | 13 out of 221                  | 0.33427111 |   |
| Arginine and proline metabolism                                             | 0      | 4 out of 50 8%   | 5.88235294117647%              | 8          | 1 |

|                                              |        |                  |                                |            |   |
|----------------------------------------------|--------|------------------|--------------------------------|------------|---|
|                                              | ko0112 |                  | 38 out of 221                  | 0.34239703 |   |
| Microbial metabolism in diverse environments | 0      | 10 out of 50 20% | 17.1945701357466%              | 1          | 1 |
|                                              | ko0201 |                  | 30 out of 221                  | 0.35874073 |   |
| ABC transporters                             | 0      | 8 out of 50 16%  | 13.5746606334842%              | 6          | 1 |
|                                              | ko0415 |                  | 2 out of 221                   | 0.40209790 |   |
| mTOR signaling pathway                       | 0      | 1 out of 50 2%   | 0.904977375565611%             | 2          | 1 |
|                                              | ko0079 |                  | 2 out of 221                   | 0.40209790 |   |
| Folate biosynthesis                          | 0      | 1 out of 50 2%   | 0.904977375565611%             | 2          | 1 |
|                                              | ko0086 |                  | 2 out of 221                   | 0.40209790 |   |
| Porphyrin and chlorophyll metabolism         | 0      | 1 out of 50 2%   | 0.904977375565611%             | 2          | 1 |
|                                              | ko0503 |                  | 2 out of 221                   | 0.40209790 |   |
| Nicotine addiction                           | 3      | 1 out of 50 2%   | 0.904977375565611%             | 2          | 1 |
|                                              | ko0474 |                  | 2 out of 221                   | 0.40209790 |   |
| Phototransduction                            | 4      | 1 out of 50 2%   | 0.904977375565611%             | 2          | 1 |
|                                              | ko0471 |                  | 2 out of 221                   | 0.40209790 |   |
| Circadian entrainment                        | 3      | 1 out of 50 2%   | 0.904977375565611%             | 2          | 1 |
|                                              | ko0407 |                  | 2 out of 221                   | 0.40209790 |   |
| Phospholipase D signaling pathway            | 2      | 1 out of 50 2%   | 0.904977375565611%             | 2          | 1 |
|                                              | ko0472 |                  | 2 out of 221                   | 0.40209790 |   |
| Long-term potentiation                       | 0      | 1 out of 50 2%   | 0.904977375565611%             | 2          | 1 |
|                                              | ko0040 |                  | 2 out of 221                   | 0.40209790 |   |
| Benzoxazinoid biosynthesis                   | 2      | 1 out of 50 2%   | 0.904977375565611%             | 2          | 1 |
|                                              | ko0071 |                  | 2 out of 221                   | 0.40209790 |   |
| Carbon fixation in photosynthetic organisms  | 0      | 1 out of 50 2%   | 0.904977375565611%             | 2          | 1 |
|                                              | ko0501 |                  | 2 out of 221                   | 0.40209790 |   |
| Amyotrophic lateral sclerosis (ALS)          | 4      | 1 out of 50 2%   | 0.904977375565611%             | 2          | 1 |
|                                              | ko0513 |                  | 2 out of 221                   | 0.40209790 |   |
| Pertussis                                    | 3      | 1 out of 50 2%   | 0.904977375565611%             | 2          | 1 |
|                                              | ko0036 |                  | 2 out of 221                   | 0.40209790 |   |
| Bisphenol degradation                        | 3      | 1 out of 50 2%   | 0.904977375565611%             | 2          | 1 |
|                                              | ko0038 |                  | 10 out of 221                  | 0.40246439 |   |
| Tryptophan metabolism                        | 0      | 3 out of 50 6%   | 4.52488687782805%              | 8          | 1 |
|                                              | ko0202 |                  | 10 out of 221                  | 0.40246439 |   |
| Two-component system                         | 0      | 3 out of 50 6%   | 4.52488687782805%              | 8          | 1 |
|                                              | ko0025 |                  | 10 out of 221                  | 0.40246439 |   |
| Alanine, aspartate and glutamate metabolism  | 0      | 3 out of 50 6%   | 4.52488687782805%              | 8          | 1 |
|                                              | ko0030 |                  |                                | 0.40964348 |   |
| Lysine biosynthesis                          | 0      | 2 out of 50 4%   | 6 out of 221 2.71493212669683% | 8          | 1 |
|                                              | ko0077 |                  |                                | 0.40964348 |   |
| Pantothenate and CoA biosynthesis            | 0      | 2 out of 50 4%   | 6 out of 221 2.71493212669683% | 8          | 1 |
|                                              | ko0106 |                  | 40 out of 221                  | 0.41628772 |   |
| Biosynthesis of plant secondary metabolites  | 0      | 10 out of 50 20% | 18.0995475113122%              | 1          | 1 |

|                                          |        |                  |                                |            |   |
|------------------------------------------|--------|------------------|--------------------------------|------------|---|
| Biosynthesis of secondary metabolites    | ko0111 |                  | 84 out of 221                  | 0.43209234 |   |
|                                          | 0      | 20 out of 50 40% | 38.0090497737557%              | 7          | 1 |
| Purine metabolism                        | ko0023 |                  |                                | 0.43685733 |   |
|                                          | 0      | 5 out of 50 10%  | 19 out of 221 8.5972850678733% | 4          | 1 |
| 2-Oxocarboxylic acid metabolism          | ko0121 |                  | 15 out of 221                  | 0.45238205 |   |
|                                          | 0      | 4 out of 50 8%   | 6.78733031674208%              | 5          | 1 |
| Nicotinate and nicotinamide metabolism   | ko0076 |                  | 11 out of 221                  | 0.47116080 |   |
|                                          | 0      | 3 out of 50 6%   | 4.97737556561086%              | 2          | 1 |
| Carbon metabolism                        | ko0120 |                  | 11 out of 221                  | 0.47116080 |   |
|                                          | 0      | 3 out of 50 6%   | 4.97737556561086%              | 2          | 1 |
| Aminoacyl-tRNA biosynthesis              | ko0097 |                  | 20 out of 221                  | 0.48826943 |   |
|                                          | 0      | 5 out of 50 10%  | 9.04977375565611%              | 7          | 1 |
| Tyrosine metabolism                      | ko0035 |                  |                                | 0.49626132 |   |
|                                          | 0      | 2 out of 50 4%   | 7 out of 221 3.16742081447964% | 2          | 1 |
| beta-Alanine metabolism                  | ko0041 |                  |                                | 0.49626132 |   |
|                                          | 0      | 2 out of 50 4%   | 7 out of 221 3.16742081447964% | 2          | 1 |
| Glutathione metabolism                   | ko0048 |                  | 12 out of 221                  | 0.53633151 |   |
|                                          | 0      | 3 out of 50 6%   | 5.42986425339367%              | 8          | 1 |
| Amphetamine addiction                    | ko0503 |                  |                                |            |   |
|                                          | 1      | 1 out of 50 2%   | 3 out of 221 1.35746606334842% | 0.53860523 | 1 |
| FoxO signaling pathway                   | ko0406 |                  |                                |            |   |
|                                          | 8      | 1 out of 50 2%   | 3 out of 221 1.35746606334842% | 0.53860523 | 1 |
| Primary bile acid biosynthesis           | ko0012 |                  |                                |            |   |
|                                          | 0      | 1 out of 50 2%   | 3 out of 221 1.35746606334842% | 0.53860523 | 1 |
| Pyruvate metabolism                      | ko0062 |                  |                                |            |   |
|                                          | 0      | 1 out of 50 2%   | 3 out of 221 1.35746606334842% | 0.53860523 | 1 |
| Gap junction                             | ko0454 |                  |                                |            |   |
|                                          | 0      | 1 out of 50 2%   | 3 out of 221 1.35746606334842% | 0.53860523 | 1 |
| Dopaminergic synapse                     | ko0472 |                  |                                |            |   |
|                                          | 8      | 1 out of 50 2%   | 3 out of 221 1.35746606334842% | 0.53860523 | 1 |
| Pentose phosphate pathway                | ko0003 |                  |                                |            |   |
|                                          | 0      | 1 out of 50 2%   | 3 out of 221 1.35746606334842% | 0.53860523 | 1 |
| Cocaine addiction                        | ko0503 |                  |                                |            |   |
|                                          | 0      | 1 out of 50 2%   | 3 out of 221 1.35746606334842% | 0.53860523 | 1 |
| Central carbon metabolism in cancer      | ko0523 |                  | 22 out of 221                  |            |   |
|                                          | 0      | 5 out of 50 10%  | 9.95475113122172%              | 0.58589714 | 1 |
| Biosynthesis of amino acids              | ko0123 |                  | 32 out of 221                  | 0.62170716 |   |
|                                          | 0      | 7 out of 50 14%  | 14.4796380090498%              | 4          | 1 |
| Glycine, serine and threonine metabolism | ko0026 |                  |                                | 0.64404675 |   |
|                                          | 0      | 2 out of 50 4%   | 9 out of 221 4.07239819004525% | 3          | 1 |
| Phenylalanine metabolism                 | ko0036 |                  |                                | 0.64404675 |   |
|                                          | 0      | 2 out of 50 4%   | 9 out of 221 4.07239819004525% | 3          | 1 |

|                                                     |        |   |                 |                                |            |               |   |
|-----------------------------------------------------|--------|---|-----------------|--------------------------------|------------|---------------|---|
| Degradation of aromatic compounds                   | ko0122 | 0 | 2 out of 50 4%  | 9 out of 221 4.07239819004525% | 0.64404675 | 3             | 1 |
| Synaptic vesicle cycle                              | ko0472 | 1 | 1 out of 50 2%  | 4 out of 221 1.80995475113122% | 0.64442971 | 9             | 1 |
| Valine, leucine and isoleucine degradation          | ko0028 | 0 | 1 out of 50 2%  | 4 out of 221 1.80995475113122% | 0.64442971 | 9             | 1 |
| Butanoate metabolism                                | ko0065 | 0 | 1 out of 50 2%  | 4 out of 221 1.80995475113122% | 0.64442971 | 9             | 1 |
| Olfactory transduction                              | ko0474 | 0 | 1 out of 50 2%  | 4 out of 221 1.80995475113122% | 0.64442971 | 9             | 1 |
| Neomycin, kanamycin and gentamicin biosynthesis     | ko0052 | 4 | 1 out of 50 2%  | 4 out of 221 1.80995475113122% | 0.64442971 | 9             | 1 |
| Starch and sucrose metabolism                       | ko0050 | 0 | 1 out of 50 2%  | 4 out of 221 1.80995475113122% | 0.64442971 | 9             | 1 |
| Alcoholism                                          | ko0503 | 4 | 1 out of 50 2%  | 4 out of 221 1.80995475113122% | 0.64442971 | 9             | 1 |
| Vitamin B6 metabolism                               | ko0075 | 0 | 1 out of 50 2%  | 4 out of 221 1.80995475113122% | 0.64442971 | 9             | 1 |
| Ubiquinone and other terpenoid-quinone biosynthesis | ko0013 | 0 | 1 out of 50 2%  | 4 out of 221 1.80995475113122% | 0.64442971 | 9             | 1 |
| Pyrimidine metabolism                               | ko0024 | 0 | 3 out of 50 6%  | 14 out of 221                  | 0.65240144 | 1             | 1 |
| Taste transduction                                  | ko0474 | 2 | 2 out of 50 4%  | 6.33484162895928%              | 0.70444234 | 10 out of 221 | 1 |
| cGMP-PKG signaling pathway                          | ko0402 | 2 | 2 out of 50 4%  | 4.52488687782805%              | 0.72635835 | 1             | 1 |
| Sulfur metabolism                                   | ko0092 | 2 | 1 out of 50 2%  | 5 out of 221 2.26244343891403% | 0.72635835 | 5             | 1 |
| Phenylpropanoid biosynthesis                        | ko0094 | 0 | 1 out of 50 2%  | 5 out of 221 2.26244343891403% | 0.74694010 | 16 out of 221 | 1 |
| Monobactam biosynthesis                             | ko0026 | 1 | 3 out of 50 6%  | 7.23981900452489%              | 0.78970132 | 4             | 1 |
| Antifolate resistance                               | ko0152 | 1 | 1 out of 50 2%  | 6 out of 221 2.71493212669683% | 0.78970132 | 8             | 1 |
| Zeatin biosynthesis                                 | ko0090 | 3 | 1 out of 50 2%  | 6 out of 221 2.71493212669683% | 0.78970132 | 8             | 1 |
| Aminobenzoate degradation                           | ko0062 | 7 | 1 out of 50 2%  | 6 out of 221 2.71493212669683% | 0.80027291 | 12 out of 221 | 1 |
| Biosynthesis of phenylpropanoids                    | ko0106 | 1 | 2 out of 50 4%  | 5.42986425339367%              | 0.81031811 | 6             | 1 |
| Glucosinolate biosynthesis                          | ko0096 | 6 | 5 out of 50 10% | 12.6696832579186%              | 0.83860799 | 28 out of 221 | 1 |
|                                                     |        | 6 | 1 out of 50 2%  | 7 out of 221 3.16742081447964% |            | 6             | 1 |

|                                                          |        |   |                 |                                |            |   |   |
|----------------------------------------------------------|--------|---|-----------------|--------------------------------|------------|---|---|
| Phosphotransferase system (PTS)                          | ko0206 | 0 | 1 out of 50 2%  | 7 out of 221 3.16742081447964% | 0.83860799 | 6 | 1 |
| Phenylalanine, tyrosine and tryptophan biosynthesis      | ko0040 | 0 | 1 out of 50 2%  | 7 out of 221 3.16742081447964% | 0.83860799 | 6 | 1 |
| Mineral absorption                                       | ko0497 | 8 | 2 out of 50 4%  | 14 out of 221                  | 0.86804734 | 2 | 1 |
| Cyanoamino acid metabolism                               | ko0046 | 0 | 1 out of 50 2%  | 6.33484162895928%              | 0.87631640 | 8 | 1 |
| Biosynthesis of antibiotics                              | ko0113 | 0 | 6 out of 50 12% | 8 out of 221 3.61990950226244% | 0.89510301 | 2 | 1 |
| Bile secretion                                           | ko0497 | 6 | 1 out of 50 2%  | 37 out of 221                  | 0.92767320 | 1 | 1 |
| Cysteine and methionine metabolism                       | ko0027 | 0 | 1 out of 50 2%  | 4.52488687782805%              | 0.94481225 | 3 | 1 |
| Biosynthesis of alkaloids derived from shikimate pathway | ko0106 | 3 | 1 out of 50 2%  | 4.97737556561086%              | 0.96801147 | 7 | 1 |
| Flavonoid biosynthesis                                   | ko0094 | 1 | 2 out of 50 4%  | 5.88235294117647%              | 0.97300535 | 8 | 1 |
| Flavone and flavonol biosynthesis                        | ko0094 | 4 | 1 out of 50 2%  | 9.50226244343891%              | 0.97570102 | 6 | 1 |
| Biosynthesis of plant hormones                           | ko0107 | 0 | 1 out of 50 2%  | 6.33484162895928%              | 0.98157034 | 3 | 1 |
